# Supplementary material for: Altered DNA methylation of glycolytic and lipogenic genes in liver from obese and type 2 diabetic patients
Source: PubMed Central journal article supplement — Mol Metab. 2016 Jan 2;5(3):171–83. doi: 10.1016/j.molmet.2015.12.004 (PMC4770265; doi:10.1016/j.molmet.2015.12.004), 2016-01-02
Supplement: mmc1.pdf [file mmc1.pdf]

Table S1 Differentially methylated sites among three phenotypic groups: obese non-diabetic group, the obese type 2 diabetic and non-obese

Total number of sites detected after multiplex comparison: 5834 sites with 3129 unique sites  
 Total number of sites detected in obese non-diabetic group (ND) versus non-obese (non) : 5682 sites with 3058 unique genes  
 Total number of sites detected obese type 2 diabetic group (T2D) versus non-obese (non) : 2255 sites with 1388 unique genes

| Probe ID   | CHR | ADDRESS ID | MAPINFO_start | MainInfo_end | RELATION TO UCSC CPG ISLAND | SOURCE                                        | STRAND | UCSC REFGENE GROUP | UCSC REFGENE NAME | ND-obese vs non-obese |           | T2D-obese vs non-obese |            |
|------------|-----|------------|---------------|--------------|-----------------------------|-----------------------------------------------|--------|--------------------|-------------------|-----------------------|-----------|------------------------|------------|
|            |     |            |               |              |                             |                                               |        |                    |                   | Area ND               | Area non  | Area T2D               | Area non   |
| cg00000024 | 11  | 23801481   | 2720463       | 2720514      | island                      | CDC                                           | F      | Body:Body          | KCNM2             | 0.526897              | 0.5810729 | 0.05247174             | 0.0555025  |
| cg00000073 | 11  | 24652013   | 14166750      | 14168800     | island                      | CGCCTTCCGATTTCCCGCCGGTCTTACGCTGCTACGGCCGCTGCA | F      | Body:Body          | CHCHD4            | 0.1142709             | 0.129171  | 0.05846236             | 0.05179053 |
| cg00000649 | 11  | 14885716   | 14885716      | 14885716     | island                      | CGCTTCCGATTTCCCGCCGGTCTTACGCTGCTACGGCCGCTGCA  | F      | Body:Body          | CHCHD4            | 0.1142709             | 0.129171  | 0.05846236             | 0.05179053 |
| cg00000871 | 10  | 5268362    | 8608196       | 8608801      | N_Share                     | CGCTTCCGATTTCCCGCCGGTCTTACGCTGCTACGGCCGCTGCA  | R      | TSS:1500           | FAM109B           | 0.79135               | 0.858258  | -0.0698071             |            |
| cg00001201 | 10  | 5268362    | 8608196       | 8608801      | N_Share                     | CGCTTCCGATTTCCCGCCGGTCTTACGCTGCTACGGCCGCTGCA  | R      | TSS:1500           | FAM109B           | 0.79135               | 0.858258  | -0.0698071             |            |
| cg00001513 | 10  | 5268362    | 8608196       | 8608801      | N_Share                     | CGCTTCCGATTTCCCGCCGGTCTTACGCTGCTACGGCCGCTGCA  | R      | TSS:1500           | FAM109B           | 0.79135               | 0.858258  | -0.0698071             |            |
| cg00002036 | 17  | 64754683   | 7377612       | 7377682      | island                      | CGCTTCCGATTTCCCGCCGGTCTTACGCTGCTACGGCCGCTGCA  | R      | UTR                | HP3B              | 0.089869              | 0.117267  | -0.027834              | 0.093065   |
| cg00002578 | 10  | 5268362    | 8608196       | 8608801      | N_Share                     | CGCTTCCGATTTCCCGCCGGTCTTACGCTGCTACGGCCGCTGCA  | R      | TSS:1500           | FAM109B           | 0.79135               | 0.858258  | -0.0698071             |            |
| cg00002742 | 2   | 11852841   | 11852841      | 11852841     | N_Share                     | CGCTTCCGATTTCCCGCCGGTCTTACGCTGCTACGGCCGCTGCA  | R      | UTR                | CPX               | 0.6428323             | 0.714729  | -0.088196              | 0.67335    |
| cg00002801 | 9   | 70817229   | 14868349      | 14868399     | island                      | CGCTTCCGATTTCCCGCCGGTCTTACGCTGCTACGGCCGCTGCA  | R      | UTR                | VPC2C             | 0.17884               | 0.152787  | -0.0258426             |            |
| cg00003454 | 9   | 5968419    | 10337163      | 10337210     | N_Share                     | CGCTTCCGATTTCCCGCCGGTCTTACGCTGCTACGGCCGCTGCA  | F      | UTR                | SPR2              | 0.5227271             | 0.634265  | 0.1116174              |            |
| cg00003536 | 1   | 51791481   | 17291209      | 17291258     | N_Share                     | CGCTTCCGATTTCCCGCCGGTCTTACGCTGCTACGGCCGCTGCA  | R      | Body               | ORCC8             | 0.6221671             | 0.673838  | -0.05147129            |            |
| cg00003826 | 10  | 5268362    | 8608196       | 8608801      | N_Share                     | CGCTTCCGATTTCCCGCCGGTCTTACGCTGCTACGGCCGCTGCA  | R      | TSS:1500           | HR7B              | 0.0288203             | 0.7937    | 0.111097143            |            |
| cg00004165 | 17  | 1861464    | 8311838       | 8311886      | NA                          | CGCTTCCGATTTCCCGCCGGTCTTACGCTGCTACGGCCGCTGCA  | F      | NA                 | NA                | 0.795043              | 0.842643  | 0.04823                |            |
| cg00004792 | 10  | 5268362    | 8608196       | 8608801      | N_Share                     | CGCTTCCGATTTCCCGCCGGTCTTACGCTGCTACGGCCGCTGCA  | R      | TSS:1500           | HOXC2             | 0.683743              | 0.735371  | -0.0994287             |            |
| cg00005154 | 9   | 4832398    | 12980192      | 12980192     | N_Share                     | CGCTTCCGATTTCCCGCCGGTCTTACGCTGCTACGGCCGCTGCA  | F      | Body               | HE2               | 0.793486              | 0.868621  | -0.0737287             |            |
| cg00005207 | 19  | 1065247    | 1288752       | 1288754      | N_Share                     | CGCTTCCGATTTCCCGCCGGTCTTACGCTGCTACGGCCGCTGCA  | F      | TSS:1500           | HOXC2             | 0.683743              | 0.735371  | -0.0994287             |            |
| cg00005401 | 9   | 4832398    | 12980192      | 12980192     | N_Share                     | CGCTTCCGATTTCCCGCCGGTCTTACGCTGCTACGGCCGCTGCA  | F      | Body               | HE2               | 0.793486              | 0.868621  | -0.0737287             |            |
| cg00005524 | 9   | 4832398    | 12980192      | 12980192     | N_Share                     | CGCTTCCGATTTCCCGCCGGTCTTACGCTGCTACGGCCGCTGCA  | F      | Body               | HE2               | 0.793486              | 0.868621  | -0.0737287             |            |
| cg00005524 | 9   | 4832398    | 12980192      | 12980192     | N_Share                     | CGCTTCCGATTTCCCGCCGGTCTTACGCTGCTACGGCCGCTGCA  | F      | Body               | HE2               | 0.793486              | 0.868621  | -0.0737287             |            |
| cg00005524 | 9   | 4832398    | 12980192      | 12980192     | N_Share                     | CGCTTCCGATTTCCCGCCGGTCTTACGCTGCTACGGCCGCTGCA  | F      | Body               | HE2               | 0.793486              | 0.868621  | -0.0737287             |            |
| cg00005524 | 9   | 4832398    | 12980192      | 12980192     | N_Share                     | CGCTTCCGATTTCCCGCCGGTCTTACGCTGCTACGGCCGCTGCA  | F      | Body               | HE2               | 0.793486              | 0.868621  | -0.0737287             |            |
| cg00005524 | 9   | 4832398    | 12980192      | 12980192     | N_Share                     | CGCTTCCGATTTCCCGCCGGTCTTACGCTGCTACGGCCGCTGCA  | F      | Body               | HE2               | 0.793486              | 0.868621  | -0.0737287             |            |
| cg00005524 | 9   | 4832398    | 12980192      | 12980192     | N_Share                     | CGCTTCCGATTTCCCGCCGGTCTTACGCTGCTACGGCCGCTGCA  | F      | Body               | HE2               | 0.793486              | 0.868621  | -0.0737287             |            |
| cg00005524 | 9   | 4832398    | 12980192      | 12980192     | N_Share                     | CGCTTCCGATTTCCCGCCGGTCTTACGCTGCTACGGCCGCTGCA  | F      | Body               | HE2               | 0.793486              | 0.868621  | -0.0737287             |            |
| cg00005524 | 9   | 4832398    | 12980192      | 12980192     | N_Share                     | CGCTTCCGATTTCCCGCCGGTCTTACGCTGCTACGGCCGCTGCA  | F      | Body               | HE2               | 0.793486              | 0.868621  | -0.0737287             |            |
| cg00005524 | 9   | 4832398    | 12980192      | 12980192     | N_Share                     | CGCTTCCGATTTCCCGCCGGTCTTACGCTGCTACGGCCGCTGCA  | F      | Body               | HE2               | 0.793486              | 0.868621  | -0.0737287             |            |
| cg00005524 | 9   | 4832398    | 12980192      | 12980192     | N_Share                     | CGCTTCCGATTTCCCGCCGGTCTTACGCTGCTACGGCCGCTGCA  | F      | Body               | HE2               | 0.793486              | 0.868621  | -0.0737287             |            |
| cg00005524 | 9   | 4832398    | 12980192      | 12980192     | N_Share                     | CGCTTCCGATTTCCCGCCGGTCTTACGCTGCTACGGCCGCTGCA  | F      | Body               | HE2               | 0.793486              | 0.868621  | -0.0737287             |            |
| cg00005524 | 9   | 4832398    | 12980192      | 12980192     | N_Share                     | CGCTTCCGATTTCCCGCCGGTCTTACGCTGCTACGGCCGCTGCA  | F      | Body               | HE2               | 0.793486              | 0.868621  | -0.0737287             |            |
| cg00005524 | 9   | 4832398    | 12980192      | 12980192     | N_Share                     | CGCTTCCGATTTCCCGCCGGTCTTACGCTGCTACGGCCGCTGCA  | F      | Body               | HE2               | 0.793486              | 0.868621  | -0.0737287             |            |
| cg00005524 | 9   | 4832398    | 12980192      | 12980192     | N_Share                     | CGCTTCCGATTTCCCGCCGGTCTTACGCTGCTACGGCCGCTGCA  | F      | Body               | HE2               | 0.793486              | 0.868621  | -0.0737287             |            |
| cg00005524 | 9   | 4832398    | 12980192      | 12980192     | N_Share                     | CGCTTCCGATTTCCCGCCGGTCTTACGCTGCTACGGCCGCTGCA  | F      | Body               | HE2               | 0.793486              | 0.868621  | -0.0737287             |            |
| cg00005524 | 9   | 4832398    | 12980192      | 12980192     | N_Share                     | CGCTTCCGATTTCCCGCCGGTCTTACGCTGCTACGGCCGCTGCA  | F      | Body               | HE2               | 0.793486              | 0.868621  | -0.0737287             |            |
| cg00005524 | 9   | 4832398    | 12980192      | 12980192     | N_Share                     | CGCTTCCGATTTCCCGCCGGTCTTACGCTGCTACGGCCGCTGCA  | F      | Body               | HE2               | 0.793486              | 0.868621  | -0.0737287             |            |
| cg00005524 | 9   | 4832398    | 12980192      | 12980192     | N_Share                     | CGCTTCCGATTTCCCGCCGGTCTTACGCTGCTACGGCCGCTGCA  | F      | Body               | HE2               | 0.793486              | 0.868621  | -0.0737287             |            |
| cg00005524 | 9   | 4832398    | 12980192      | 12980192     | N_Share                     | CGCTTCCGATTTCCCGCCGGTCTTACGCTGCTACGGCCGCTGCA  | F      | Body               | HE2               | 0.793486              | 0.868621  | -0.0737287             |            |
| cg00005524 | 9   | 4832398    | 12980192      | 12980192     | N_Share                     | CGCTTCCGATTTCCCGCCGGTCTTACGCTGCTACGGCCGCTGCA  | F      | Body               | HE2               | 0.793486              | 0.868621  | -0.0737287             |            |
| cg00005524 | 9   | 4832398    | 12980192      | 12980192     | N_Share                     | CGCTTCCGATTTCCCGCCGGTCTTACGCTGCTACGGCCGCTGCA  | F      | Body               | HE2               | 0.793486              | 0.868621  | -0.0737287             |            |
| cg00005524 | 9   | 4832398    | 12980192      | 12980192     | N_Share                     | CGCTTCCGATTTCCCGCCGGTCTTACGCTGCTACGGCCGCTGCA  | F      | Body               | HE2               | 0.793486              | 0.868621  | -0.0737287             |            |
| cg00005524 | 9   | 4832398    | 12980192      | 12980192     | N_Share                     | CGCTTCCGATTTCCCGCCGGTCTTACGCTGCTACGGCCGCTGCA  | F      | Body               | HE2               | 0.793486              | 0.868621  | -0.0737287             |            |
| cg00005524 | 9   | 4832398    | 12980192      | 12980192     | N_Share                     | CGCTTCCGATTTCCCGCCGGTCTTACGCTGCTACGGCCGCTGCA  | F      | Body               | HE2               | 0.793486              | 0.868621  | -0.0737287             |            |
| cg00005524 | 9   | 4832398    | 12980192      | 12980192     | N_Share                     | CGCTTCCGATTTCCCGCCGGTCTTACGCTGCTACGGCCGCTGCA  | F      | Body               | HE2               | 0.793486              | 0.868621  | -0.0737287             |            |
| cg00005524 | 9   | 4832398    | 12980192      | 12980192     | N_Share                     | CGCTTCCGATTTCCCGCCGGTCTTACGCTGCTACGGCCGCTGCA  | F      | Body               | HE2               | 0.793486              | 0.868621  | -0.0737287             |            |
| cg00005524 | 9   | 4832398    | 12980192      | 12980192     | N_Share                     | CGCTTCCGATTTCCCGCCGGTCTTACGCTGCTACGGCCGCTGCA  | F      | Body               | HE2               | 0.793486              | 0.868621  | -0.0737287             |            |
| cg00005524 | 9   | 4832398    | 12980192      | 12980192     | N_Share                     | CGCTTCCGATTTCCCGCCGGTCTTACGCTGCTACGGCCGCTGCA  | F      | Body               | HE2               | 0.793486              | 0.868621  | -0.0737287             |            |
| cg00005524 | 9   | 4832398    | 12980192      | 12980192     | N_Share                     | CGCTTCCGATTTCCCGCCGGTCTTACGCTGCTACGGCCGCTGCA  | F      | Body               | HE2               | 0.793486              | 0.868621  | -0.0737287             |            |
| cg00005524 | 9   | 4832398    | 12980192      | 12980192     | N_Share                     | CGCTTCCGATTTCCCGCCGGTCTTACGCTGCTACGGCCGCTGCA  | F      | Body               | HE2               | 0.793486              | 0.868621  | -0.0737287             |            |
| cg00005524 | 9   | 4832398    | 12980192      | 12980192     | N_Share                     | CGCTTCCGATTTCCCGCCGGTCTTACGCTGCTACGGCCGCTGCA  | F      | Body               | HE2               | 0.793486              | 0.868621  | -0.0737287             |            |
| cg00005524 | 9   | 4832398    | 12980192      | 12980192     | N_Share                     | CGCTTCCGATTTCCCGCCGGTCTTACGCTGCTACGGCCGCTGCA  | F      | Body               | HE2               | 0.793486              | 0.868621  | -0.0737287             |            |
| cg00005524 | 9   | 4832398    | 12980192      | 12980192     | N_Share                     | CGCTTCCGATTTCCCGCCGGTCTTACGCTGCTACGGCCGCTGCA  | F      | Body               | HE2               | 0.793486              | 0.868621  | -0.0737287             |            |
| cg00005524 | 9   | 4832398    | 12980192      | 12980192     | N_Share                     | CGCTTCCGATTTCCCGCCGGTCTTACGCTGCTACGGCCGCTGCA  | F      | Body               | HE2               | 0.793486              | 0.868621  | -0.0737287             |            |
| cg00005524 | 9   | 4832398    | 12980192      | 12980192     | N_Share                     | CGCTTCCGATTTCCCGCCGGTCTTACGCTGCTACGGCCGCTGCA  | F      | Body               | HE2               | 0.793486              | 0.868621  | -0.0737287             |            |
| cg00005524 | 9   | 4832398    | 12980192      | 12980192     | N_Share                     | CGCTTCCGATTTCCCGCCGGTCTTACGCTGCTACGGCCGCTGCA  | F      | Body               | HE2               | 0.793486              | 0.868621  | -0.0737287             |            |
| cg00005524 | 9   | 4832398    | 12980192      | 12980192     | N_Share                     | CGCTTCCGATTTCCCGCCGGTCTTACGCTGCTACGGCCGCTGCA  | F      | Body               | HE2               | 0.793486              | 0.868621  | -0.0737287             |            |
| cg00005524 | 9   | 4832398    | 12980192      | 12980192     | N_Share                     | CGCTTCCGATTTCCCGCCGGTCTTACGCTGCTACGGCCGCTGCA  | F      | Body               | HE2               | 0.793486              | 0.868621  | -0.0737287             |            |
| cg00005524 | 9   | 4832398    | 12980192      | 12980192     | N_Share                     | CGCTTCCGATTTCCCGCCGGTCTTACGCTGCTACGGCCGCTGCA  | F      | Body               | HE2               | 0.793486              | 0.868621  | -0.0737287             |            |
| cg00005524 | 9   | 4832398    | 12980192      | 12980192     | N_Share                     | CGCTTCCGATTTCCCGCCGGTCTTACGCTGCTACGGCCGCTGCA  | F      | Body               | HE2               | 0.793486              | 0.868621  | -0.0737287             |            |
| cg00005524 | 9   | 4832398    | 12980192      | 12980192     | N_Share                     | CGCTTCCGATTTCCCGCCGGTCTTACGCTGCTACGGCCGCTGCA  | F      | Body               | HE2               | 0.793486              | 0.868621  | -0.0737287             |            |
| cg00005524 | 9   | 4832398    | 12980192      | 12980192     | N_Share                     | CGCTTCCGATTTCCCGCCGGTCTTACGCTGCTACGGCCGCTGCA  | F      | Body               | HE2               | 0.793486              | 0.868621  | -0.0737287             |            |
| cg00005524 | 9   | 4832398    | 12980192      | 12980192     | N_Share                     | CGCTTCCGATTTCCCGCCGGTCTTACGCTGCTACGGCCGCTGCA  | F      | Body               | HE2               | 0.793486              | 0.868621  | -0.0737287             |            |
| cg00005524 | 9   | 4832398    | 12980192      | 12980192     | N_Share                     | CGCTTCCGATTTCCCGCCGGTCTTACGCTGCTACGGCCGCTGCA  | F      | Body               | HE2               | 0.793486              | 0.868621  | -0.0737287             |            |
| cg00005524 | 9   | 4832398    | 12980192      | 12980192     | N_Share                     | CGCTTCCGATTTCCCGCCGGTCTTACGCTGCTACGGCCGCTGCA  | F      | Body               | HE2               | 0.793486              | 0.868621  | -0.0737287             |            |
| cg00005524 | 9   | 4832398    | 12980192      | 12980192     | N_Share                     | CGCTTCCGATTTCCCGCCGGTCTTACGCTGCTACGGCCGCTGCA  | F      | Body               | HE2               | 0.793486              | 0.868621  | -0.0737287             |            |
| cg00005524 | 9   | 4832398    | 12980192      | 12980192     | N_Share                     | CGCTTCCGATTTCCCGCCGGTCTTACGCTGCTACGGCCGCTGCA  | F      | Body               | HE2               | 0.793486              | 0.868621  | -0.0737287             |            |
| cg00005524 | 9   | 4832398    | 12980192      | 12980192     | N_Share                     | CGCTTCCGATTTCCCGCCGGTCTTACGCTGCTACGGCCGCTGCA  | F      | Body               | HE2               | 0.793486              | 0.868621  | -0.0737287             |            |
| cg00005524 | 9   |            |               |              |                             |                                               |        |                    |                   |                       |           |                        |            |

|           |    |           |           |           |         |                                               |   |                  |         |           |           |             |           |           |           |
|-----------|----|-----------|-----------|-----------|---------|-----------------------------------------------|---|------------------|---------|-----------|-----------|-------------|-----------|-----------|-----------|
| 007021016 | 11 | 2580320   | 7674587   | 7674517   | NA      | C05C02CAAAAGTTGACCTGAGTTCGCTGAAAGATGTTG       | R | TSS1500          | BQ8NTE  | 0.7790343 | 0.83854   | -0.0586574  |           |           |           |
| 007021017 | 11 | 7554427   | 7674587   | 7674517   | NA      | C05C02CAAAAGTTGACCTGAGTTCGCTGAAAGATGTTG       | R | TSS1500          | BQ8NTE  | 0.6337866 | 0.925858  | -0.03991    |           |           |           |
| 007021018 | 14 | 2574411   | 5333122   | 5333122   | NA      | AGAGACGATTTACACCTGCTGATGATACCCAGCAGCATG       | F | Body/Body        | BERT    | 0.8779292 | 0.901867  | -0.0243827  |           |           |           |
| 007021019 | 14 | 4071746   | 7601332   | 7601332   | S_Shore | TAAAGTAGCTTACCCCTGACCCAGCAGCAGCAGCAGCAGC      | F | UTR              | FARM2   | 0.8516271 | 0.706841  | -0.0548326  |           |           |           |
| 007021020 | 14 | 7871327   | 7601332   | 7601332   | S_Shore | C05C1TTCAGTTCGCTGCTGCTGCTGCTGCTGCTGCTGCTG     | F | Body             | PEP1    | 0.9310814 | 0.873588  | -0.0394877  | 0.8353688 | 0.8739486 | -0.02035  |
| 007021021 | 14 | 1413789   | 14143799  | 14143799  | N_Shore | GGTCTTTCCTCCAGGGCAGGCTGCTGCTGCTGCTGCTGCTG     | R | TSS1500/Body     | SSP1    | 0.8071777 | 0.115439  | -0.0236243  | 0.0837444 | 0.1114338 | -0.027799 |
| 007021022 | 14 | 5174447   | 13973793  | 13973793  | N_Shore | GGTCTTTCCTCCAGGGCAGGCTGCTGCTGCTGCTGCTGCTG     | R | TSS1500          | Chw12   | 0.2877474 | 0.361789  | -0.0274614  |           |           |           |
| 007021023 | 14 | 1523629   | 1523629   | 1523629   | N_Shore | CGACAGACTCTGCTGCTGCTGCTGCTGCTGCTGCTGCTG       | R | Body             | PEP1    | 0.9310814 | 0.873588  | -0.0394877  | 0.8052813 | 0.81433   | -0.03699  |
| 007021024 | 14 | 4897781   | 4897781   | 4897781   | NA      | C05C02CAAAAGTTGACCTGAGTTCGCTGAAAGATGTTG       | F | NA               | NA      | 0.7698886 | 0.81147   | -0.0415814  |           |           |           |
| 007021025 | 14 | 3386025   | 3386025   | 3386025   | NA      | CTTACAGCACTGATGATGATGATGATGATGATGATGATGATG    | F | TSS1500, TSS1500 | NA      | 0.8884868 | 0.91257   | -0.02247143 |           |           |           |
| 007021026 | 14 | 20033584  | 20033584  | 20033584  | Island  | CGCCACCTCCAGCCAGCAGCAGCAGCAGCAGCAGCAGCAGC     | R | Body             | FLJ2063 | 0.1461743 | 0.10436   | -0.03978286 | 0.0133506 | 0.106436  | -0.026676 |
| 007021027 | 14 | 1163143   | 13139625  | 13139630  | NA      | GTCGTGGTTCATGAGTTCGCTGCTGCTGCTGCTGCTGCTG      | R | TSS200           | PL3     | 0.7839174 | 0.82797   | -0.0427871  | 0.7966913 | 0.82797   | -0.031279 |
| 007021028 | 14 | 11581     | 2574411   | 2574411   | NA      | CTGACAGACTCTGCTGCTGCTGCTGCTGCTGCTGCTGCTG      | R | Body             | PEP1    | 0.9310814 | 0.873588  | -0.0394877  |           |           |           |
| 007021029 | 14 | 8189486   | 8189486   | 8189486   | NA      | CTGACAGACTCTGCTGCTGCTGCTGCTGCTGCTGCTGCTG      | R | Body             | L02     | 0.6814371 | 0.01291   | -0.1347287  | 0.7357375 | 0.81461   | -0.07833  |
| 007021030 | 14 | 7262406   | 16732979  | 16732979  | S_Shore | TATTTCTTCATGATGATGATGATGATGATGATGATGATGATG    | F | Body             | PEP1    | 0.6738806 | 0.752157  | -0.0737917  |           |           |           |
| 007021031 | 14 | 18732979  | 18732979  | 18732979  | S_Shore | CTGACAGACTCTGCTGCTGCTGCTGCTGCTGCTGCTGCTG      | F | Body             | WGAN    | 0.255343  | 0.36291   | -0.0394877  | 0.2970938 | 0.36291   | -0.06538  |
| 007021032 | 14 | 6180944   | 10100760  | 10100760  | S_Shore | CTGACAGACTCTGCTGCTGCTGCTGCTGCTGCTGCTGCTG      | F | Body             | WGAN    | 0.8576686 | 0.89421   | -0.0394877  |           |           |           |
| 007021033 | 14 | 5853253   | 5853253   | 5853253   | NA      | CTGACAGACTCTGCTGCTGCTGCTGCTGCTGCTGCTGCTG      | F | Body/Body        | WGAN    | 0.8884868 | 0.91257   | -0.02247143 |           |           |           |
| 007021034 | 14 | 1792454   | 1792454   | 1792454   | NA      | CGTGTTCATGATGATGATGATGATGATGATGATGATGATGATG   | F | TSS1500/Body     | MRS48N  | 0.819826  | 0.888243  | -0.06841429 |           |           |           |
| 007021035 | 14 | 1375272   | 5022573   | 5022623   | S_Shore | CGTGTTCATGATGATGATGATGATGATGATGATGATGATGATG   | R | NA               | NA      | 0.8748143 | 0.923209  | -0.04188671 | 0.8924263 | 0.923209  | -0.030577 |
| 007021036 | 14 | 3206254   | 3206254   | 3206254   | NA      | C05C02CAAAAGTTGACCTGAGTTCGCTGAAAGATGTTG       | F | Body             | CNP13   | 0.7489343 | 0.806329  | -0.0677871  | 0.7633043 | 0.806329  | -0.043897 |
| 007021037 | 14 | 7972428   | 3825488   | 3825518   | Island  | C05C02CAAAAGTTGACCTGAGTTCGCTGAAAGATGTTG       | R | Body             | WDR88   | 0.0308    | 0.562394  | -0.05879149 |           |           |           |
| 007021038 | 14 | 6943917   | 6943917   | 6943917   | NA      | CGCCACCTCCAGCCAGCAGCAGCAGCAGCAGCAGCAGCAGC     | R | TSS1500          | GNE3    | 0.8216257 | 0.854291  | -0.03369574 |           |           |           |
| 007021039 | 14 | 12604376  | 10744488  | 10744488  | NA      | GATATCTTGAATTTTTCTCCAGCCAGCTCAGGCTGAGTGAAG    | R | NA               | NA      | 0.8735134 | 0.06297   | -0.04173486 | 0.8928265 | 0.912567  | -0.02241  |
| 007021040 | 14 | 1098989   | 1098989   | 1098989   | S_Shelf | TGGGATGGGATGCTCCAGGAGCCAGCAGCAGCAGCAGCAGC     | R | NA               | NA      | 0.8316186 | 0.87491   | -0.04249149 | 0.8407863 | 0.87491   | -0.034124 |
| 007021041 | 14 | 4766984   | 4766984   | 4766984   | NA      | CGTGTTCATGATGATGATGATGATGATGATGATGATGATGATG   | F | Body/Body        | GFA1    | 0.875424  | 0.9046    | -0.03986971 |           |           |           |
| 007021042 | 14 | 1073610   | 1073610   | 1073610   | S_Shore | CGACAGCCCTCTCTGACAGCCAGCAGCAGCAGCAGCAGCAGC    | R | NA               | NA      | 0.7688587 | 0.838271  | -0.06424129 |           |           |           |
| 007021043 | 14 | 5402729   | 5402729   | 5402729   | NA      | GATATCTTGAATTTTTCTCCAGCCAGCTCAGGCTGAGTGAAG    | R | Body             | YTH1    | 0.2274742 | 0.19004   | -0.07193426 |           |           |           |
| 007021044 | 14 | 1489819   | 8320213   | 8320213   | S_Shore | AATATGTCGATTTTTCTCCAGCCAGCTCAGGCTGAGTGAAG     | R | TSS1500, TSS1500 | CLTR    | 0.7444877 | 0.806329  | -0.0677871  |           |           |           |
| 007021045 | 14 | 3860434   | 3860434   | 3860434   | N_Shore | CTCAGTCTGATGATGATGATGATGATGATGATGATGATGATGATG | R | Body             | CNP2    | 0.8735134 | 0.06297   | -0.04173486 |           |           |           |
| 007021046 | 14 | 294392    | 294392    | 294392    | NA      | CGTGTTCATGATGATGATGATGATGATGATGATGATGATGATG   | R | 1xNon-UTR        | PEP2    | 0.4925714 | 0.566107  | -0.07354286 |           |           |           |
| 007021047 | 14 | 2938969   | 2938969   | 2938969   | NA      | CGTGTTCATGATGATGATGATGATGATGATGATGATGATGATG   | R | Body             | CNP2    | 0.8735134 | 0.06297   | -0.04173486 |           |           |           |
| 007021048 | 14 | 1910459   | 5201282   | 5201282   | NA      | CGAGGAAAGGATTAATAACTTCTGATGATGATGATGATGATG    | F | UTR              | PCNTD1  | 0.7396114 | 0.800403  | -0.06792857 |           |           |           |
| 007021049 | 14 | 5071111   | 5071111   | 5071111   | NA      | CGTGTTCATGATGATGATGATGATGATGATGATGATGATGATG   | F | Body/Body        | CNP1    | 0.7674    | 0.800403  | -0.06792857 |           |           |           |
| 007021050 | 14 | 2575444   | 2575444   | 2575444   | N_Shore | CGCCAGCAAAAGTGGAGCTGAGCAGTCACTCAATGAATGTTGCTG | R | NA               | NA      | 0.8905129 | 0.7639214 | -0.07340571 |           |           |           |
| 007021051 | 14 | 4073042   | 4073042   | 4073042   | Island  | CGCCCAAAAGTGGAGCTGAGCAGTCACTCAATGAATGTTGCTG   | R | Body             | ORZ21   | 0.8776743 | 0.814937  | -0.03728149 | 0.8486838 | 0.814937  | -0.06632  |
| 007021052 | 14 | 123232875 | 123232875 | 123232875 | NA      | CTTCTCTGATGATGATGATGATGATGATGATGATGATGATGATG  | R | TSS1500          | ORZ21   | 0.8776743 | 0.814937  | -0.03728149 |           |           |           |
| 007021053 | 14 | 8841510   | 8841510   | 8841510   | NA      | GGTCTGCTGATGATGATGATGATGATGATGATGATGATGATGATG | R | 1xNon-UTR        | CNP2    | 0.6463857 | 0.723387  | -0.05887771 |           |           |           |
| 007021054 | 14 | 3794327   | 3794327   | 3794327   | S_Shelf | CGTGTTCATGATGATGATGATGATGATGATGATGATGATGATG   | R | Body             | ZNF132A | 0.771014  | 0.898957  | -0.08884266 |           |           |           |
| 007021055 | 14 | 1449819   | 8320213   | 8320213   | S_Shore | AATATGTCGATTTTTCTCCAGCCAGCTCAGGCTGAGTGAAG     | R | Body             | ORZ21   | 0.7489343 | 0.806329  | -0.0677871  |           |           |           |
| 007021056 | 14 | 1053018   | 1053018   | 1053018   | NA      | CGTGTTCATGATGATGATGATGATGATGATGATGATGATGATG   | R | Body             | CH74    | 0.8804386 | 0.775086  | -0.02962    |           |           |           |
| 007021057 | 14 | 5498225   | 5498225   | 5498225   | NA      | CGTGTTCATGATGATGATGATGATGATGATGATGATGATGATG   | R | 1xNon-UTR        | CNP1    | 0.8735134 | 0.06297   | -0.04173486 |           |           |           |
| 007021058 | 14 | 115892913 | 115892913 | 115892913 | NA      | CGTGTTCATGATGATGATGATGATGATGATGATGATGATGATG   | R | UTR              | IRP2    | 0.8061329 | 0.8728129 | -0.06668    |           |           |           |
| 007021059 | 14 | 8405871   | 8405871   | 8405871   | NA      | CGTGTTCATGATGATGATGATGATGATGATGATGATGATGATG   | R | NA               | NA      | 0.8327314 | 0.887489  | -0.0574129  | 0.8352113 | 0.887489  | -0.05272  |
| 007021060 | 14 | 3794327   | 3794327   | 3794327   | S_Shelf | CGTGTTCATGATGATGATGATGATGATGATGATGATGATGATG   | R | Body             | ZNF132A | 0.771014  | 0.898957  | -0.08884266 |           |           |           |
| 007021061 | 14 | 1053018   | 1053018   | 1053018   | NA      | CGTGTTCATGATGATGATGATGATGATGATGATGATGATGATG   | R | Body             | CH74    | 0.8804386 | 0.775086  | -0.02962    |           |           |           |
| 007021062 | 14 | 5498225   | 5498225   | 5498225   | NA      | CGTGTTCATGATGATGATGATGATGATGATGATGATGATGATG   | R | 1xNon-UTR        | CNP1    | 0.8735134 | 0.06297   | -0.04173486 |           |           |           |
| 007021063 | 14 | 115892913 | 115892913 | 115892913 | NA      | CGTGTTCATGATGATGATGATGATGATGATGATGATGATGATG   | R | UTR              | IRP2    | 0.8061329 | 0.8728129 | -0.06668    |           |           |           |
| 007021064 | 14 | 8405871   | 8405871   | 8405871   | NA      | CGTGTTCATGATGATGATGATGATGATGATGATGATGATGATG   | R | NA               | NA      | 0.8327314 | 0.887489  | -0.0574129  | 0.8352113 | 0.887489  | -0.05272  |
| 007021065 | 14 | 3794327   | 3794327   | 3794327   | S_Shelf | CGTGTTCATGATGATGATGATGATGATGATGATGATGATGATG   | R | Body             | ZNF132A | 0.771014  | 0.898957  | -0.08884266 |           |           |           |
| 007021066 | 14 | 1053018   | 1053018   | 1053018   | NA      | CGTGTTCATGATGATGATGATGATGATGATGATGATGATGATG   | R | Body             | CH74    | 0.8804386 | 0.775086  | -0.02962    |           |           |           |
| 007021067 | 14 | 5498225   | 5498225   | 5498225   | NA      | CGTGTTCATGATGATGATGATGATGATGATGATGATGATGATG   | R | 1xNon-UTR        | CNP1    | 0.8735134 | 0.06297   | -0.04173486 |           |           |           |
| 007021068 | 14 | 115892913 | 115892913 | 115892913 | NA      | CGTGTTCATGATGATGATGATGATGATGATGATGATGATGATG   | R | UTR              | IRP2    | 0.8061329 | 0.8728129 | -0.06668    |           |           |           |
| 007021069 | 14 | 8405871   | 8405871   | 8405871   | NA      | CGTGTTCATGATGATGATGATGATGATGATGATGATGATGATG   | R | NA               | NA      | 0.8327314 | 0.887489  | -0.0574129  | 0.8352113 | 0.887489  | -0.05272  |
| 007021070 | 14 | 3794327   | 3794327   | 3794327   | S_Shelf | CGTGTTCATGATGATGATGATGATGATGATGATGATGATGATG   | R | Body             | ZNF132A | 0.771014  | 0.898957  | -0.08884266 |           |           |           |
| 007021071 | 14 | 1053018   | 1053018   | 1053018   | NA      | CGTGTTCATGATGATGATGATGATGATGATGATGATGATGATG   | R | Body             | CH74    | 0.8804386 | 0.775086  | -0.02962    |           |           |           |
| 007021072 | 14 | 5498225   | 5498225   | 5498225   | NA      | CGTGTTCATGATGATGATGATGATGATGATGATGATGATGATG   | R | 1xNon-UTR        | CNP1    | 0.8735134 | 0.06297   | -0.04173486 |           |           |           |
| 007021073 | 14 | 115892913 | 115892913 | 115892913 | NA      | CGTGTTCATGATGATGATGATGATGATGATGATGATGATGATG   | R | UTR              | IRP2    | 0.8061329 | 0.8728129 | -0.06668    |           |           |           |
| 007021074 | 14 | 8405871   | 8405871   | 8405871   | NA      | CGTGTTCATGATGATGATGATGATGATGATGATGATGATGATG   | R | NA               | NA      | 0.8327314 | 0.887489  | -0.0574129  | 0.8352113 | 0.887489  | -0.05272  |
| 007021075 | 14 | 3794327   | 3794327   | 3794327   | S_Shelf | CGTGTTCATGATGATGATGATGATGATGATGATGATGATGATG   | R | Body             | ZNF132A | 0.771014  | 0.898957  | -0.08884266 |           |           |           |
| 007021076 | 14 | 1053018   | 1053018   | 1053018   | NA      | CGTGTTCATGATGATGATGATGATGATGATGATGATGATGATG   | R | Body             | CH74    | 0.8804386 | 0.775086  | -0.02962    |           |           |           |
| 007021077 | 14 | 5498225   | 5498225   | 5498225   | NA      | CGTGTTCATGATGATGATGATGATGATGATGATGATGATGATG   | R | 1xNon-UTR        | CNP1    | 0.8735134 | 0.06297   | -0.04173486 |           |           |           |
| 007021078 | 14 | 115892913 | 115892913 | 115892913 |         |                                               |   |                  |         |           |           |             |           |           |           |



|           |    |          |          |          |          |                                             |   |                     |           |          |            |             |           |          |             |
|-----------|----|----------|----------|----------|----------|---------------------------------------------|---|---------------------|-----------|----------|------------|-------------|-----------|----------|-------------|
| 022023607 | 7  | 4860485  | 279881   | 279881   | S, Shore | CGGCTCTCTCTGCAAGCCGCGTATATACCCAGCGGAGCCCAT  | F | N/A                 | N/A       | 0.869207 | 0.898183   | -0.03696617 | 0.885425  | 0.899813 | -0.014372   |
| 022023414 | 7  | 23402281 | 23402281 | 23402281 | S, Shore | CATCAAGGATTTGGGAGGAGGAGGAGGAGGAGGAGGAGGAGG  | F | N/A                 | N/A       | 0.869207 | 0.898183   | -0.03696617 | 0.885425  | 0.899813 | -0.014372   |
| 022023487 | 14 | 3074531  | 3074531  | 3074531  | S, Shelf | AAAGCGCTGGCTGGTGTGACAGCCAGCCATGTTTCTGCTGAGC | R | TSS1500             | FERS      | 0.738663 | 0.836202   | -0.09615871 | 0.806899  | 0.92026  | -0.13337    |
| 022023484 | 14 | 5979312  | 15438650 | 15438650 | N, Shore | CGGCTGAAGGACAGGATTAAGTCAATGAGATCCGAGTTCAGCT | R | TSS1500             | KAA0922   | 0.678371 | 0.775279   | -0.09630714 | 0.806899  | 0.92026  | -0.13337    |
| 022023451 | 14 | 7811919  | 7811919  | 7811919  | N, Shore | CCGACGAGAGGAGGCTCTGAGGAGGAGGAGGAGGAGGAGGAGG | R | TSS1500             | 1.2144845 | 0.862471 | -0.2862471 | 0.806899    | 0.92026   | -0.13337 |             |
| 022023510 | 14 | 2724646  | 3731066  | 3731066  | N, Shore | CGGAGAGATATGTTGGTATGATTTAGAAAGAACTGATGTTATG | R | Body                | HEATRSB   | 0.758629 | 0.816514   | -0.09628751 | 0.816005  | 0.856974 | -0.040606   |
| 022023947 | 14 | 4786484  | 4786484  | 4786484  | N, Shore | AAAGTCAAGGAGGAGGAGGAGGAGGAGGAGGAGGAGGAGGAGG | F | 1xEnem:UTR          | MF5DL     | 0.734718 | 0.799230   | -0.06494286 | 0.806899  | 0.92026  | -0.13337    |
| 022023947 | 14 | 10417256 | 10417256 | 10417256 | N, Shore | CGGCTCTCTCTGCAAGCCGCGTATATACCCAGCGGAGCCCAT  | F | N/A                 | N/A       | 0.869207 | 0.898183   | -0.03696617 | 0.885425  | 0.899813 | -0.014372   |
| 022027163 | 16 | 7278459  | 7807870  | 7807870  | N, Shore | CGGCTCTCTCTGCAAGCCGCGTATATACCCAGCGGAGCCCAT  | F | Body/Body           | ANAA      | 0.872697 | 0.920274   | -0.04782268 | 0.905578  | 0.920274 | -0.014749   |
| 022027163 | 16 | 598209   | 598209   | 598209   | N, Shore | CGGCTCTCTCTGCAAGCCGCGTATATACCCAGCGGAGCCCAT  | F | Body/Body           | ANAA      | 0.868257 | 0.918847   | -0.06825717 | 0.868257  | 0.918847 | -0.068257   |
| 022027743 | 16 | 598209   | 598209   | 598209   | N, Shore | CGGCTCTCTCTGCAAGCCGCGTATATACCCAGCGGAGCCCAT  | F | Body/Body           | ANAA      | 0.868257 | 0.918847   | -0.06825717 | 0.868257  | 0.918847 | -0.068257   |
| 022029945 | 6  | 2670450  | 3324759  | 3324759  | S, Shore | CGGCTCTCTCTGCAAGCCGCGTATATACCCAGCGGAGCCCAT  | F | Body                | WDR46     | 0.726807 | 0.864186   | -0.04043129 | 0.806899  | 0.92026  | -0.13337    |
| 022029945 | 6  | 3371749  | 3783169  | 3783169  | N, Shore | CGGCTCTCTCTGCAAGCCGCGTATATACCCAGCGGAGCCCAT  | F | Body                | SONF      | 0.825111 | 0.891291   | -0.03696617 | 0.806899  | 0.92026  | -0.13337    |
| 022029414 | 6  | 2911258  | 3313138  | 3313138  | S, Shore | CGGCTCTCTCTGCAAGCCGCGTATATACCCAGCGGAGCCCAT  | F | UTR:3UTR:3UTR       | COL11A2   | 0.768157 | 0.818567   | -0.05148071 | 0.785688  | 0.819567 | -0.020897   |
| 022029414 | 6  | 2911258  | 3313138  | 3313138  | S, Shore | CGGCTCTCTCTGCAAGCCGCGTATATACCCAGCGGAGCCCAT  | F | UTR                 | CBY502    | 0.465557 | 0.542769   | -0.08273123 | 0.745305  | 0.817443 | -0.082109   |
| 022029414 | 6  | 2911258  | 3313138  | 3313138  | S, Shelf | CGGCTCTCTCTGCAAGCCGCGTATATACCCAGCGGAGCCCAT  | F | UTR                 | TYK2      | 0.8462   | 0.886287   | -0.04043129 | 0.806899  | 0.92026  | -0.13337    |
| 022029414 | 6  | 2911258  | 3313138  | 3313138  | S, Shelf | CGGCTCTCTCTGCAAGCCGCGTATATACCCAGCGGAGCCCAT  | F | UTR                 | VP53C     | 0.692771 | 0.815847   | -0.05027    | 0.806899  | 0.92026  | -0.13337    |
| 022029414 | 6  | 2911258  | 3313138  | 3313138  | S, Shelf | CGGCTCTCTCTGCAAGCCGCGTATATACCCAGCGGAGCCCAT  | F | UTR                 | RKX3      | 0.608257 | 0.676122   | -0.07197143 | 0.806899  | 0.92026  | -0.13337    |
| 022029414 | 6  | 2911258  | 3313138  | 3313138  | S, Shelf | CGGCTCTCTCTGCAAGCCGCGTATATACCCAGCGGAGCCCAT  | F | UTR                 | MOBK12A   | 0.922647 | 0.913043   | -0.02924713 | 0.7346    | 0.813443 | -0.078404   |
| 022029414 | 6  | 2911258  | 3313138  | 3313138  | S, Shelf | CGGCTCTCTCTGCAAGCCGCGTATATACCCAGCGGAGCCCAT  | F | N/A                 | N/A       | 0.897087 | 0.945445   | -0.04686871 | 0.914183  | 0.934453 | -0.029271   |
| 022029414 | 6  | 2911258  | 3313138  | 3313138  | S, Shelf | CGGCTCTCTCTGCAAGCCGCGTATATACCCAGCGGAGCCCAT  | F | N/A                 | N/A       | 0.751714 | 0.8202     | -0.05708871 | 0.847375  | 0.903249 | -0.081586   |
| 022029414 | 6  | 2911258  | 3313138  | 3313138  | S, Shelf | CGGCTCTCTCTGCAAGCCGCGTATATACCCAGCGGAGCCCAT  | F | N/A                 | N/A       | 0.870457 | 0.938714   | -0.06325774 | 0.907373  | 0.938714 | -0.0285     |
| 022029414 | 6  | 2911258  | 3313138  | 3313138  | S, Shelf | CGGCTCTCTCTGCAAGCCGCGTATATACCCAGCGGAGCCCAT  | F | Body                | FAM107B   | 0.806257 | 0.888797   | -0.02924713 | 0.806257  | 0.888797 | -0.02924713 |
| 022029414 | 6  | 2911258  | 3313138  | 3313138  | S, Shelf | CGGCTCTCTCTGCAAGCCGCGTATATACCCAGCGGAGCCCAT  | F | Body                | MAP4      | 0.869207 | 0.898183   | -0.03696617 | 0.869207  | 0.898183 | -0.03696617 |
| 022029414 | 6  | 2911258  | 3313138  | 3313138  | S, Shelf | CGGCTCTCTCTGCAAGCCGCGTATATACCCAGCGGAGCCCAT  | F | Body                | KCNJ1     | 0.851677 | 0.892204   | -0.04694286 | 0.866775  | 0.892204 | -0.026124   |
| 022029414 | 6  | 2911258  | 3313138  | 3313138  | S, Shelf | CGGCTCTCTCTGCAAGCCGCGTATATACCCAGCGGAGCCCAT  | F | N/A                 | N/A       | 0.768743 | 0.832587   | -0.06494286 | 0.806899  | 0.92026  | -0.13337    |
| 022029414 | 6  | 2911258  | 3313138  | 3313138  | S, Shelf | CGGCTCTCTCTGCAAGCCGCGTATATACCCAGCGGAGCCCAT  | F | TSS200              | RETN      | 0.117228 | 0.770114   | -0.05028871 | 0.716217  | 0.770114 | -0.05498    |
| 022029414 | 6  | 2911258  | 3313138  | 3313138  | S, Shelf | CGGCTCTCTCTGCAAGCCGCGTATATACCCAGCGGAGCCCAT  | F | Body                | PNX3      | 0.232824 | 0.321414   | -0.04707162 | 0.863793  | 0.91414  | -0.062248   |
| 022029414 | 6  | 2911258  | 3313138  | 3313138  | S, Shelf | CGGCTCTCTCTGCAAGCCGCGTATATACCCAGCGGAGCCCAT  | F | Body                | UTR       | 0.100228 | 0.155829   | -0.05384229 | 0.1201578 | 0.155829 | -0.038425   |
| 022029414 | 6  | 2911258  | 3313138  | 3313138  | S, Shelf | CGGCTCTCTCTGCAAGCCGCGTATATACCCAGCGGAGCCCAT  | F | Body:5UTR:5UTR      | PLK3      | 0.552858 | 0.624278   | -0.05384229 | 0.552858  | 0.624278 | -0.05384229 |
| 022029414 | 6  | 2911258  | 3313138  | 3313138  | S, Shelf | CGGCTCTCTCTGCAAGCCGCGTATATACCCAGCGGAGCCCAT  | F | N/A                 | N/A       | 0.689614 | 0.817543   | -0.08312857 | 0.806899  | 0.92026  | -0.13337    |
| 022029414 | 6  | 2911258  | 3313138  | 3313138  | S, Shelf | CGGCTCTCTCTGCAAGCCGCGTATATACCCAGCGGAGCCCAT  | F | N/A                 | N/A       | 0.877828 | 0.920274   | -0.04191429 | 0.894305  | 0.920274 | -0.026569   |
| 022029414 | 6  | 2911258  | 3313138  | 3313138  | S, Shelf | CGGCTCTCTCTGCAAGCCGCGTATATACCCAGCGGAGCCCAT  | F | Body:Body           | PLK3      | 0.689614 | 0.817543   | -0.08312857 | 0.806899  | 0.92026  | -0.13337    |
| 022029414 | 6  | 2911258  | 3313138  | 3313138  | S, Shelf | CGGCTCTCTCTGCAAGCCGCGTATATACCCAGCGGAGCCCAT  | F | Body:Body:Body      | MLPL      | 0.714628 | 0.831043   | -0.12012429 | 0.74305   | 0.831043 | -0.082109   |
| 022029414 | 6  | 2911258  | 3313138  | 3313138  | S, Shelf | CGGCTCTCTCTGCAAGCCGCGTATATACCCAGCGGAGCCCAT  | F | Body:5UTR:5UTR:Body | SEGF7     | 0.751714 | 0.8202     | -0.05708871 | 0.847375  | 0.903249 | -0.081586   |
| 022029414 | 6  | 2911258  | 3313138  | 3313138  | S, Shelf | CGGCTCTCTCTGCAAGCCGCGTATATACCCAGCGGAGCCCAT  | F | N/A                 | N/A       | 0.868451 | 0.770114   | -0.101445   | 0.70119   | 0.770114 | -0.099111   |
| 022029414 | 6  | 2911258  | 3313138  | 3313138  | S, Shelf | CGGCTCTCTCTGCAAGCCGCGTATATACCCAGCGGAGCCCAT  | F | TSS1500             | CLU       | 0.860280 | 0.894477   | -0.03094286 | 0.860280  | 0.894477 | -0.03094286 |
| 022029414 | 6  | 2911258  | 3313138  | 3313138  | S, Shelf | CGGCTCTCTCTGCAAGCCGCGTATATACCCAGCGGAGCCCAT  | F | Body:Body           | ARNTL     | 0.608257 | 0.676122   | -0.07197143 | 0.806899  | 0.92026  | -0.13337    |
| 022029414 | 6  | 2911258  | 3313138  | 3313138  | S, Shelf | CGGCTCTCTCTGCAAGCCGCGTATATACCCAGCGGAGCCCAT  | F | Body                | CYP2C1    | 0.859614 | 0.890757   | -0.03194286 | 0.859614  | 0.890757 | -0.03194286 |
| 022029414 | 6  | 2911258  | 3313138  | 3313138  | S, Shelf | CGGCTCTCTCTGCAAGCCGCGTATATACCCAGCGGAGCCCAT  | F | Body                | TNFR2     | 0.804729 | 0.848286   | -0.04555714 | 0.804813  | 0.848286 | -0.03807    |
| 022029414 | 6  | 2911258  | 3313138  | 3313138  | S, Shelf | CGGCTCTCTCTGCAAGCCGCGTATATACCCAGCGGAGCCCAT  | F | TSS1500             | NPW       | 0.869207 | 0.898183   | -0.03696617 | 0.869207  | 0.898183 | -0.03696617 |
| 022029414 | 6  | 2911258  | 3313138  | 3313138  | S, Shelf | CGGCTCTCTCTGCAAGCCGCGTATATACCCAGCGGAGCCCAT  | F | Body                | KMPD      | 0.804729 | 0.848286   | -0.04555714 | 0.804813  | 0.848286 | -0.03807    |
| 022029414 | 6  | 2911258  | 3313138  | 3313138  | S, Shelf | CGGCTCTCTCTGCAAGCCGCGTATATACCCAGCGGAGCCCAT  | F | Body                | TRAP2     | 0.869207 | 0.898183   | -0.03696617 | 0.869207  | 0.898183 | -0.03696617 |
| 022029414 | 6  | 2911258  | 3313138  | 3313138  | S, Shelf | CGGCTCTCTCTGCAAGCCGCGTATATACCCAGCGGAGCCCAT  | F | Body                | TRAP2     | 0.869207 | 0.898183   | -0.03696617 | 0.869207  | 0.898183 | -0.03696617 |
| 022029414 | 6  | 2911258  | 3313138  | 3313138  | S, Shelf | CGGCTCTCTCTGCAAGCCGCGTATATACCCAGCGGAGCCCAT  | F | Body                | TRAP2     | 0.869207 | 0.898183   | -0.03696617 | 0.869207  | 0.898183 | -0.03696617 |
| 022029414 | 6  | 2911258  | 3313138  | 3313138  | S, Shelf | CGGCTCTCTCTGCAAGCCGCGTATATACCCAGCGGAGCCCAT  | F | Body                | TRAP2     | 0.869207 | 0.898183   | -0.03696617 | 0.869207  | 0.898183 | -0.03696617 |
| 022029414 | 6  | 2911258  | 3313138  | 3313138  | S, Shelf | CGGCTCTCTCTGCAAGCCGCGTATATACCCAGCGGAGCCCAT  | F | Body                | TRAP2     | 0.869207 | 0.898183   | -0.03696617 | 0.869207  | 0.898183 | -0.03696617 |
| 022029414 | 6  | 2911258  | 3313138  | 3313138  | S, Shelf | CGGCTCTCTCTGCAAGCCGCGTATATACCCAGCGGAGCCCAT  | F | Body                | TRAP2     | 0.869207 | 0.898183   | -0.03696617 | 0.869207  | 0.898183 | -0.03696617 |
| 022029414 | 6  | 2911258  | 3313138  | 3313138  | S, Shelf | CGGCTCTCTCTGCAAGCCGCGTATATACCCAGCGGAGCCCAT  | F | Body                | TRAP2     | 0.869207 | 0.898183   | -0.03696617 | 0.869207  | 0.898183 | -0.03696617 |
| 022029414 | 6  | 2911258  | 3313138  | 3313138  | S, Shelf | CGGCTCTCTCTGCAAGCCGCGTATATACCCAGCGGAGCCCAT  | F | Body                | TRAP2     | 0.869207 | 0.898183   | -0.03696617 | 0.869207  | 0.898183 | -0.03696617 |
| 022029414 | 6  | 2911258  | 3313138  | 3313138  | S, Shelf | CGGCTCTCTCTGCAAGCCGCGTATATACCCAGCGGAGCCCAT  | F | Body                | TRAP2     | 0.869207 | 0.898183   | -0.03696617 | 0.869207  | 0.898183 | -0.03696617 |
| 022029414 | 6  | 2911258  | 3313138  | 3313138  | S, Shelf | CGGCTCTCTCTGCAAGCCGCGTATATACCCAGCGGAGCCCAT  | F | Body                | TRAP2     | 0.869207 | 0.898183   | -0.03696617 | 0.869207  | 0.898183 | -0.03696617 |
| 022029414 | 6  | 2911258  | 3313138  | 3313138  | S, Shelf | CGGCTCTCTCTGCAAGCCGCGTATATACCCAGCGGAGCCCAT  | F | Body                | TRAP2     | 0.869207 | 0.898183   | -0.03696617 | 0.869207  | 0.898183 | -0.03696617 |
| 022029414 | 6  | 2911258  | 3313138  | 3313138  | S, Shelf | CGGCTCTCTCTGCAAGCCGCGTATATACCCAGCGGAGCCCAT  | F | Body                | TRAP2     | 0.869207 | 0.898183   | -0.03696617 | 0.869207  | 0.898183 | -0.03696617 |
| 022029414 | 6  | 2911258  | 3313138  | 3313138  | S, Shelf | CGGCTCTCTCTGCAAGCCGCGTATATACCCAGCGGAGCCCAT  | F | Body                | TRAP2     | 0.869207 | 0.898183   | -0.03696617 | 0.869207  | 0.898183 | -0.03696617 |
| 022029414 | 6  | 2911258  | 3313138  | 3313138  | S, Shelf | CGGCTCTCTCTGCAAGCCGCGTATATACCCAGCGGAGCCCAT  | F | Body                | TRAP2     | 0.869207 | 0.898183   | -0.03696617 | 0.869207  | 0.898183 | -0.03696617 |
| 022029414 | 6  | 2911258  | 3313138  | 3313138  | S, Shelf | CGGCTCTCTCTGCAAGCCGCGTATATACCCAGCGGAGCCCAT  | F | Body                | TRAP2     | 0.869207 | 0.898183   | -0.03696617 | 0.869207  | 0.898183 | -0.03696617 |
| 022029414 | 6  | 2911258  | 3313138  | 3313138  | S, Shelf | CGGCTCTCTCTGCAAGCCGCGTATATACCCAGCGGAGCCCAT  | F | Body                | TRAP2     | 0.869207 |            |             |           |          |             |



























































Table\_S2 Number of significantly changed genes or CpG-sties

|                        | Methylome                                                                 | Transcriptome               | Overlay                                                              | Negative correlation                                                                                                     |
|------------------------|---------------------------------------------------------------------------|-----------------------------|----------------------------------------------------------------------|--------------------------------------------------------------------------------------------------------------------------|
| ND-obese vs non-obese  | Genes: 3058<br>↓ 2915 + ↑ 143<br>metylation sites: 5682<br>↓ 5485 + ↑ 197 | Genes: 713<br>↓ 432 + ↑ 281 | mRNA genes: 36<br>↓ 13 + ↑ 23<br>methylation sites: 46<br>↓ 45 + ↑ 1 | mRNA ↑ and me sites ↓<br>Genes: 23<br>methylation sites: 26<br>mRNA ↓ and me sites ↑<br>Genes: 0<br>methylation sites: 0 |
| T2D-obese vs non-obese | Genes: 1388<br>↓ 1259 + ↑ 129<br>metylation sites: 2255<br>↓ 2079 + ↑ 176 | Genes: 920<br>↓ 510 + ↑ 410 | mRNA genes: 61<br>↓ 23 + ↑ 38<br>methylation sites: 73<br>↓ 66 + ↑ 7 | mRNA ↑ and me sites ↓<br>Genes: 33<br>methylation sites: 40<br>mRNA ↓ and me sites ↑<br>Genes: 2<br>methylation sites: 2 |

Table\_S3 Differentially expressed genes between any pairs of three phenotypic groups, obese non-diabetic group, obese non-diabetic group, the obese type 2 diabetic and non-obese

| Name      | Obese non-diabetic group versus non-obese group |           |          |           |          |          | Obese type2 diabetic group versus non-obese group |          |         |           |          |          | Obese non-diabetic group versus obese type2 diabetic group |          |          |          |         |          |          |          |         |          |          |          |
|-----------|-------------------------------------------------|-----------|----------|-----------|----------|----------|---------------------------------------------------|----------|---------|-----------|----------|----------|------------------------------------------------------------|----------|----------|----------|---------|----------|----------|----------|---------|----------|----------|----------|
|           | probe_ID                                        | logFC     | AvExpr   | P.Value   | FDR      | B        | probe_ID                                          | logFC    | AvExpr  | P.Value   | FDR      | B        | Name                                                       | probe_ID | logFC    | AvExpr   | P.Value | FDR      | B        |          |         |          |          |          |
| PRKCE     | 8041763                                         | 0.885949  | 6.86951  | 2.908569  | 0.002959 | 0.311677 | -2.52271                                          | PRKCE    | 8041763 | 1.236419  | 6.86951  | 4.356631 | 0.000369                                                   | 0.095471 | 0.266886 | SNORA55  | 7915227 | -1.12042 | 6.174885 | -6.4721  | 0.02026 | 0.13382  | 3.649661 |          |
| RPL13     | 7997940                                         | -0.17861  | 8.178815 | -6.26888  | 1.94606  | 0.097874 | 4.091509                                          | ACLY     | 8015460 | -0.325385 | 7.015875 | 3.23275  | 0.000454                                                   | 0.19962  | -1.94936 | SNHG12   | 7914212 | -0.84869 | 7.771999 | -5.87655 | 1.36605 | 0.168211 | 2.584545 |          |
| SNV       | 7896112                                         | 0.734514  | 5.693033 | 5.890917  | 2.57605  | 0.123468 | 2.780948                                          | NRS2A2   | 7908597 | 0.052949  | 8.843344 | -7.00991 | 1.039406                                                   | 0.02993  | 5.930808 | SNORD14E | 7912211 | -1.19041 | 6.672392 | -5.82489 | 1.52605 | 0.162211 | 2.505182 |          |
| SCS8      | 7910046                                         | -0.64544  | 6.125789 | -5.80698  | 1.57605  | 0.123468 | 2.77755                                           | GAS5     | 7970329 | 0.854495  | 6.40888  | 6.564718 | 3.74006                                                    | 0.02993  | 4.317044 | SNV      | 7980610 | 0.557174 | 7.219183 | 5.537525 | 2.78605 | 0.204247 | 2.055104 |          |
| RPL13     | 8010318                                         | -0.74322  | 5.75806  | -5.687808 | 2.02605  | 0.123468 | 2.577822                                          | NUT19P1  | 7994993 | -0.52452  | 4.018086 | -6.51337 | 3.30676                                                    | 0.02993  | 4.231488 | BS2      | 8001507 | 0.552304 | 6.616208 | 5.50203  | 2.38505 | 0.204247 | 1.915551 |          |
| SNV       | 7982377                                         | -0.70747  | 3.806939 | -5.14829  | 2.35605  | 0.123468 | 2.577822                                          | RPL13    | 7993281 | 0.673965  | 7.72016  | 6.53212  | 5.106106                                                   | 0.02993  | 3.963782 | SNUL4    | 8176570 | -0.86528 | 6.318763 | -5.40595 | 3.68605 | 0.204247 | 1.844805 |          |
| RFX5      | 7919971                                         | 0.492369  | 6.086236 | 5.576398  | 2.56605  | 0.123468 | 2.387929                                          | CDKN1A   | 8118088 | 1.037604  | 6.11616  | 6.27491  | 6.63606                                                    | 0.02993  | 3.742311 | SNV      | 8032862 | -0.46834 | 6.266997 | -5.31307 | 4.02605 | 0.200899 | 1.693776 |          |
| DDP3      | 7941621                                         | 0.459435  | 6.85951  | 5.569645  | 0.62065  | 0.123468 | 2.376412                                          | SNV      | 8096077 | -0.6113   | 7.248785 | -6.13967 | 7.98066                                                    | 0.02993  | 3.595344 | SNV      | 7894322 | -1.1757  | 5.27015  | -5.26127 | 5.02605 | 0.200899 | 1.692028 |          |
| IL2       | 7942828                                         | 1.434413  | 7.730106 | 5.499983  | 3.36605  | 0.130579 | 2.167195                                          | FAM134B  | 8111136 | -0.97088  | 7.673045 | -6.13    | 8.05606                                                    | 0.02993  | 3.578562 | SNV      | 7894719 | -0.80989 | 6.696957 | -5.16526 | 6.18605 | 0.223374 | 1.451335 |          |
| AGK       | 8136614                                         | 0.400572  | 6.410806 | 5.307885  | 4.52605  | 0.130579 | 1.926865                                          | SNV      | 7931168 | -0.61398  | 10.1272  | -6.039   | 0.04609                                                    | 0.02993  | 3.480946 | RPS8     | 7910406 | -0.56914 | 5.125789 | -5.1277  | 6.7105  | 0.223374 | 1.389172 |          |
| SNORD41   | 8034512                                         | -0.64852  | 11.06296 | -5.28441  | 4.78605  | 0.130579 | 1.88222                                           | ALPK2    | 8023258 | 2.007309  | 5.646617 | 6.065706 | 9.19606                                                    | 0.02993  | 3.466647 | CLDN12   | 8134091 | 0.300003 | 9.09801  | 5.067851 | 7.64605 | 0.231302 | 1.289681 |          |
| UNBDL     | 7940621                                         | -0.70423  | 4.089339 | -5.28125  | 4.41805  | 0.130579 | 1.876673                                          | TNRC6    | 8010188 | -0.53906  | 6.466669 | -6.03204 | 8.95606                                                    | 0.02993  | 3.407781 | RPL13    | 7997940 | -0.53526 | 8.178815 | -4.97343 | 0.00210 | 0.254446 | 1.078611 |          |
| TNRC6C    | 8010188                                         | -0.47106  | 6.846999 | -5.22719  | 4.92605  | 0.130579 | 1.859012                                          | KYNU     | 8045339 | -0.51685  | 8.846554 | -6.0195  | 10.2025                                                    | 0.02993  | 3.379562 | SNV      | 7895841 | -0.57451 | 7.561394 | -4.93251 | 0.00210 | 0.254446 | 1.06271  |          |
| NUSAP1    | 7982889                                         | 0.42734   | 4.937349 | 5.24794   | 1.5065   | 0.130579 | 1.821293                                          | CRELD2   | 8045339 | 0.70553   | 6.114955 | 5.904059 | 1.28E+05                                                   | 0.02993  | 3.182265 | SNV      | 8139887 | -0.46279 | 6.429649 | -4.91388 | 0.00210 | 0.254446 | 1.031257 |          |
| RAP2A     | 7969693                                         | 0.536908  | 6.644343 | 5.184426  | 5.93605  | 0.130579 | 1.706033                                          | CDNF     | 7932177 | -0.61859  | 6.64075  | -5.89561 | 1.31E+05                                                   | 0.02993  | 3.167281 | FAM134B  | 8111136 | 0.771795 | 5.630405 | 4.873004 | 0.00210 | 0.252925 | 0.962079 |          |
| SNORD32E  | 8117746                                         | -0.55496  | 5.17442  | -5.13946  | 6.00605  | 0.130579 | 1.618268                                          | REF      | 7927210 | 0.75329   | 4.313304 | 5.884939 | 1.34E+05                                                   | 0.02993  | 3.148345 | CCDC9    | 8029894 | -0.49195 | 5.760045 | -4.85042 | 0.00210 | 0.252925 | 0.923754 |          |
| PIGR      | 7923929                                         | 0.519416  | 7.662899 | 5.10365   | 7.07605  | 0.130579 | 1.526233                                          | C4orf37  | 8101816 | -0.33999  | 4.580864 | -5.88082 | 1.35E+05                                                   | 0.02993  | 3.141038 | SNHG12   | 7914212 | -0.68707 | 5.572051 | -4.7737  | 0.00210 | 0.247092 | 0.793037 |          |
| MIR1292   | 7946078                                         | 0.585226  | 5.981893 | 5.072889  | 7.56645  | 0.130579 | 1.398245                                          | H2AFV2   | 7928107 | 0.837605  | 5.157294 | 5.844228 | 1.55E+05                                                   | 0.030963 | 3.022399 | RNS5491  | 8068510 | -0.33384 | 4.634801 | -4.76579 | 0.00210 | 0.247092 | 0.779515 |          |
| SNV       | 8117055                                         | -0.455244 | 4.87543  | 5.011698  | 8.64605  | 0.130579 | 1.398245                                          | AJUBA    | 7973784 | 0.390244  | 6.251157 | 5.804743 | 1.58E+05                                                   | 0.030963 | 3.005439 | SNORA2   | 7920273 | -1.5089  | 10.33362 | -4.72897 | 0.00210 | 0.247092 | 0.713086 |          |
| ZNF69     | 8025968                                         | -0.46164  | 6.759015 | -0.99698  | 8.73E+05 | 0.130579 | 1.389683                                          | SNV      | 7840748 | 0.664782  | 5.488189 | 5.76246  | 1.72E+05                                                   | 0.01058  | 2.929678 | BS5      | 7984686 | 0.343089 | 4.617662 | 4.704959 | 0.00210 | 0.247092 | 0.675252 |          |
| SNV       | 7892680                                         | -0.59244  | 8.356215 | -4.95585  | 8.07605  | 0.130579 | 1.376499                                          | PPM1K    | 8101701 | -0.94763  | 5.587076 | -5.78246 | 1.02E+05                                                   | 0.031058 | 2.887039 | TRMT1L   | 7922870 | 0.29041  | 7.478181 | 4.657235 | 0.00210 | 0.247092 | 0.593118 |          |
| SNV       | 7894980                                         | -0.53441  | 6.412599 | -4.9887   | 8.99E+05 | 0.130579 | 1.374921                                          | PLD1     | 8092134 | -0.49978  | 8.549163 | -5.7259  | 1.87E+05                                                   | 0.031058 | 2.863945 | WHAMM    | 7985482 | 0.31379  | 6.07118  | 4.631518 | 0.00210 | 0.247092 | 0.548739 |          |
| SNORD11E  | 7981994                                         | -0.64248  | 5.789905 | -4.9834   | 9.05E+05 | 0.130579 | 1.356303                                          | C5orf24  | 8101863 | 0.401212  | 8.744946 | 5.672255 | 2.09E+05                                                   | 0.03229  | 2.67115  | SNV      | 7984929 | 0.517681 | 4.99211  | 4.612077 | 0.00210 | 0.247092 | 0.301348 |          |
| RPL13A    | 8030360                                         | -0.46692  | 10.57052 | -4.98149  | 9.23E+05 | 0.130579 | 1.343987                                          | NAPEPDL  | 8141872 | -0.79743  | 7.512023 | -5.66114 | 2.14E+05                                                   | 0.03229  | 2.747    | PION     | 8140478 | 0.50246  | 8.163154 | 4.582273 | 0.00210 | 0.247092 | 0.645336 |          |
| TP53I3    | 8102017                                         | -0.78967  | 6.6318   | 4.97374   | 9.41E+05 | 0.130579 | 1.327591                                          | LMNBTL3  | 8101203 | -0.76956  | 6.489783 | -5.83155 | 2.28E+05                                                   | 0.03229  | 2.693346 | SNV      | 7893100 | 0.833219 | 5.186104 | 4.532571 | 0.00210 | 0.247092 | 0.305103 |          |
| SNV       | 7895660                                         | -0.673786 | 7.340254 | -4.94354  | 0.0001   | 0.134522 | 1.275652                                          | CLDN12   | 8134091 | -0.3202   | 9.09801  | -5.60865 | 2.39E+05                                                   | 0.03229  | 2.651735 | SNV      | 8047459 | -0.65762 | 2.15554  | -5.15459 | 0.00210 | 0.247092 | 0.345966 |          |
| GNAI2     | 8137865                                         | 0.469257  | 6.700329 | 4.88942   | 0.00113  | 0.135261 | 1.177875                                          | SMPD3A   | 8121794 | -0.57539  | 3.444822 | -5.88683 | 2.50E+05                                                   | 0.03229  | 2.612004 | RNS5176  | 8104392 | -0.44193 | 2.61193  | -5.41511 | 0.00210 | 0.247092 | 0.303381 |          |
| C5orf24   | 8101863                                         | 0.343993  | 8.744946 | 4.85761   | 0.00021  | 0.149268 | 1.120294                                          | RNF50    | 7910590 | -0.87183  | 5.86822  | -5.5834  | 2.72E+05                                                   | 0.03229  | 2.605649 | SNV      | 7895696 | 0.510138 | 2.035539 | 4.48101  | 0.00210 | 0.247092 | 0.287443 |          |
| ULBP2     | 8127210                                         | -0.33088  | 2.59687  | -4.80453  | 0.00016  | 0.159597 | 1.023733                                          | KRMO1    | 8056201 | -0.85566  | 7.12728  | -5.4548  | 2.35E+05                                                   | 0.033495 | 2.536532 | SEPECS   | 8099696 | 0.371215 | 8.807067 | 4.462024 | 0.00210 | 0.247092 | 0.254288 |          |
| SNV       | 8011258                                         | -0.30863  | 6.379181 | -4.79445  | 0.000139 | 0.159597 | 1.005383                                          | GYS2     | 7961673 | -0.34685  | 10.46994 | -5.52122 | 2.82E+05                                                   | 0.033495 | 2.510427 | CDNF     | 7932177 | 0.466979 | 6.44075  | 4.50623  | 0.00210 | 0.247092 | 0.234868 |          |
| SNV       | 8011511                                         | -0.35189  | 6.816953 | -4.78989  | 0.000141 | 0.159597 | 1.005383                                          | GNAI2    | 8137865 | 0.523829  | 6.700329 | 5.0678   | 2.78E+05                                                   | 0.033495 | 2.505429 | SNHG12   | 7914212 | -0.68707 | 5.572051 | -4.7737  | 0.00210 | 0.247092 | 0.779515 |          |
| WDR45L    | 8019253                                         | -0.315849 | 8.195043 | -4.72457  | 0.000162 | 0.174428 | 0.877187                                          | RBM51P1  | 7964757 | -0.77343  | 6.33267  | -5.49731 | 3.66E+05                                                   | 0.037341 | 2.647818 | RPL13A   | 8030360 | -0.46692 | 8.9233   | 7.82827  | -4.8027 | 0.00210  | 0.247092 | 0.305103 |
| VPS3A     | 7967240                                         | 0.487316  | 5.785354 | 4.69556   | 0.000173 | 0.179498 | 0.822748                                          | MIR4800L | 8098995 | 0.410388  | 6.530454 | 3.69522  | 3.98E+05                                                   | 0.042059 | 2.124627 | SCRNA2   | 7953383 | -0.7427  | 8.093806 | -4.37993 | 0.00210 | 0.247092 | 0.110522 |          |
| RET       | 7927120                                         | 0.597166  | 4.133004 | 4.67064   | 0.000183 | 0.179498 | 0.778858                                          | ATG2B    | 7891192 | -0.3677   | 9.022724 | -5.36226 | 4.00E+05                                                   | 0.042059 | 2.198993 | SCRNA1   | 8102050 | 0.519146 | 6.146737 | 4.37977  | 0.00210 | 0.247092 | 0.305103 |          |
| ARNDCA    | 7986350                                         | 0.717193  | 6.64736  | 4.651926  | 0.000191 | 0.179498 | 0.744458                                          | NCD13    | 7928342 | 0.50277   | 5.310278 | -5.33219 | 4.31E+05                                                   | 0.042722 | 2.143138 | SNV      | 7894923 | 0.401774 | 6.280037 | 4.369696 | 0.00210 | 0.247092 | 0.305103 |          |
| LNDC00575 | 8101359                                         | -0.40321  | 8.846601 | -4.64167  | 0.000195 | 0.179498 | 0.724458                                          | UTOR1F   | 7962344 | -0.76276  | 6.36028  | -5.32671 | 4.36E+05                                                   | 0.042722 | 2.133058 | SCRNA5   | 8049297 | -0.77432 | 8.216163 | -4.32579 | 0.00210 | 0.247092 | 0.305103 |          |
| PDE7A     | 8151074                                         | 0.288314  | 5.028451 | 4.620813  | 0.000204 | 0.179498 | 0.687192                                          | HNMT     | 8045499 | -0.38059  | 8.786716 | -5.30108 | 4.61E+05                                                   | 0.043861 | 2.085208 | PEX1     | 8140915 | 0.335725 | 7.519196 | 4.320089 | 0.00210 | 0.247092 | 0.305103 |          |
| SNV       | 8084122                                         | -0.43077  | 4.482891 | -4.61564  | 0.000207 | 0.179498 | 0.677657                                          | INHBE    | 7956426 | 1.38783   | 9.06172  | 5.27039  | 4.90E+05                                                   | 0.045294 | 2.032983 | SNV      | 7892605 | 0.576009 | 7.07588  | 4.318547 | 0.0001  | 0.247092 |          |          |



|           |         |          |          |           |          |          |          |          |         |          |          |          |          |          |          |           |         |          |          |           |          |          |          |
|-----------|---------|----------|----------|-----------|----------|----------|----------|----------|---------|----------|----------|----------|----------|----------|----------|-----------|---------|----------|----------|-----------|----------|----------|----------|
| MSN       | 8167965 | 0.604048 | 8.704564 | 0.418557  | 0.000784 | 0.197693 | -0.43842 | MNV      | 8133110 | -0.33035 | 6.191567 | -4.35099 | 0.000372 | 0.095471 | 0.259724 | ANGTT     | 8128052 | 0.33341  | 6.329663 | 3.814609  | 0.001239 | 0.316412 | -0.89452 |
| #NV       | 7893327 | 0.587043 | 2.285655 | 0.401146  | 0.000785 | 0.197693 | -0.44048 | MNV      | 7595801 | -0.61944 | 5.302723 | -4.34994 | 0.000373 | 0.095471 | 0.257657 | MNV       | 8144669 | 0.677331 | 7.166358 | 3.814222  | 0.00124  | 0.316412 | -0.89521 |
| SIGLE12   | 8003852 | -0.31179 | 3.988818 | -0.101359 | 0.000792 | 0.197693 | -0.4478  | MNV      | 8014664 | -0.54833 | 6.78313  | -4.36877 | 0.000376 | 0.095471 | 0.251628 | CHIC2     | 8100638 | 0.235471 | 6.003627 | 3.810311  | 0.001251 | 0.316412 | -0.90223 |
| TCTA      | 8079746 | 0.380017 | 7.489008 | 0.411326  | 0.000793 | 0.197693 | -0.44841 | MNV      | 8019649 | -0.54833 | 6.78313  | -4.36877 | 0.000376 | 0.095471 | 0.251628 | SNORA49   | 7960052 | -0.63115 | 7.559655 | -3.80623  | 0.001262 | 0.316412 | -0.90956 |
| #NV       | 7893838 | -0.43833 | 1.409834 | -0.101358 | 0.000796 | 0.197693 | -0.4517  | FAM1108  | 8146533 | -0.38664 | 5.773252 | -4.33557 | 0.000387 | 0.096976 | 0.225457 | CDK18     | 7909104 | -0.47793 | 6.64099  | -3.80253  | 0.001273 | 0.316412 | -0.91619 |
| ZBTB33    | 8169683 | 0.470959 | 7.845789 | 0.400753  | 0.000803 | 0.197693 | -0.45923 | LOC40094 | 8050227 | 0.856076 | 3.959898 | 4.33085  | 0.000387 | 0.096976 | 0.224494 | UHR3      | 8046213 | 0.249058 | 8.210763 | 3.798275  | 0.001285 | 0.316412 | -0.92381 |
| RLP13A // | 8030366 | -0.81586 | 6.782847 | -4.00712  | 0.000804 | 0.197693 | -0.46095 | EPOR1    | 8132369 | 0.570504 | 5.476251 | 4.32716  | 0.000393 | 0.097246 | 0.212746 | MIR308    | 8153905 | 0.423155 | 6.899938 | 3.795217  | 0.001294 | 0.316412 | -0.92982 |
| #NV       | 8147475 | 0.259922 | 2.599122 | 0.403881  | 0.000821 | 0.197693 | -0.46628 | MNV      | 8007228 | -0.39094 | 6.465481 | -4.32008 | 0.000394 | 0.097978 | 0.198889 | HM1218    | 8133083 | 0.324993 | 6.607372 | 3.790399  | 0.001309 | 0.316412 | -0.9386  |
| #NV       | 8149627 | -0.24268 | 2.076711 | -0.40079  | 0.000815 | 0.197693 | -0.47199 | AKR1A1   | 7901110 | 0.284377 | 6.687642 | 4.31891  | 0.0004   | 0.098798 | 0.195764 | SETD9     | 8105456 | 0.369529 | 6.583889 | 3.789936  | 0.001309 | 0.316412 | -0.93878 |
| #NV       | 7893702 | 0.772845 | 2.076713 | 3.995739  | 0.000825 | 0.197693 | -0.48153 | SNORD12C | 8063435 | 0.291756 | 5.929373 | 4.31325  | 0.000405 | 0.098394 | 0.185591 | HGDFR2    | 8024864 | -0.27997 | 6.076792 | -3.78826  | 0.001314 | 0.316412 | -0.94179 |
| #NV       | 7893263 | -0.52998 | 1.06148  | -0.99467  | 0.000827 | 0.197693 | -0.48356 | PARP2    | 7946201 | 0.28403  | 6.722995 | 4.20743  | 0.00041  | 0.099018 | 0.173611 | RF3       | 7985563 | 0.328544 | 6.043501 | 3.780237  | 0.001338 | 0.316412 | -0.95618 |
| ANX46     | 8115234 | 0.512979 | 1.512915 | 3.990855  | 0.000834 | 0.197693 | -0.49076 | FAM123   | 7947801 | -0.48422 | 6.512889 | -4.37424 | 0.000429 | 0.098866 | 0.134577 | MNV       | 8102728 | 0.402644 | 5.576339 | 3.770151  | 0.001368 | 0.316412 | -0.97428 |
| LAL2      | 8130598 | -0.42007 | 0.128438 | -0.98876  | 0.000838 | 0.197693 | -0.49473 | MNV      | 7895099 | -2.24211 | 4.777332 | -2.8447  | 0.000432 | 0.100866 | 0.128739 | MNV       | 804664  | 0.475462 | 6.78313  | 3.769247  | 0.001371 | 0.316412 | -0.97591 |
| FAM9B     | 8171271 | -0.60129 | 3.085376 | -0.98575  | 0.00084  | 0.197693 | -0.49701 | SLC19A2  | 7921262 | -0.63043 | 7.400099 | -4.28447 | 0.000432 | 0.100866 | 0.128739 | MNV       | 8019669 | 0.475462 | 6.78313  | 3.769247  | 0.001371 | 0.316412 | -0.97591 |
| #NV       | 7896050 | 0.327801 | 10.56574 | 3.983264  | 0.000848 | 0.197693 | -0.50511 | MNV      | 8119580 | -0.64594 | 3.97217  | -4.28223 | 0.000434 | 0.100866 | 0.124331 | ZNF618    | 8157381 | -0.37016 | 4.410687 | -3.7684   | 0.001374 | 0.316412 | -0.97742 |
| #NV       | 7895857 | -0.53699 | 7.83354  | -0.98235  | 0.00085  | 0.197693 | -0.50684 | GOLM1    | 8162117 | 1.333075 | 6.357459 | 4.28213  | 0.000434 | 0.100866 | 0.12409  | RNU4-7P   | 8130181 | -0.4158  | 3.438394 | -3.76744  | 0.001377 | 0.316412 | -0.97915 |
| LOC10050  | 7982020 | -0.77803 | 3.01929  | -3.97969  | 0.000855 | 0.197693 | -0.51289 | MPL1     | 8076241 | 0.280303 | 6.015479 | 4.279938 | 0.000436 | 0.100866 | 0.119803 | EGFL7     | 8159354 | -0.32186 | 5.713925 | -3.76403  | 0.001387 | 0.316412 | -0.98828 |
| FAM98A    | 8051413 | 0.360918 | 7.53228  | 3.97068   | 0.000872 | 0.199926 | -0.5289  | AKO3     | 8075995 | 1.02059  | 6.134571 | 4.27445  | 0.000442 | 0.10141  | 0.108959 | ACAD8     | 7945283 | 0.284091 | 7.674979 | 3.726823  | 0.001393 | 0.316412 | -0.98241 |
| SNORD63   | 8114468 | -0.55417 | 5.371115 | -3.96854  | 0.000877 | 0.199926 | -0.52895 | RNS5A91  | 8068510 | 0.299    | 6.458481 | 4.26845  | 0.000448 | 0.101939 | 0.097121 | MNV       | 8047503 | -0.29102 | 2.934445 | -3.76099  | 0.001397 | 0.316412 | -0.99073 |
| GATL3     | 8075322 | -0.57697 | 5.439917 | -3.96418  | 0.000885 | 0.200519 | -0.5412  | ALDH6A1  | 7980006 | -0.59098 | 7.759881 | -4.2659  | 0.00045  | 0.101939 | 0.097121 | MNAT      | 8045499 | 0.269434 | 6.786716 | 3.752827  | 0.001423 | 0.318444 | -1.00538 |
| #NV       | 8180386 | 0.317752 | 5.940233 | 3.958824  | 0.000894 | 0.201117 | -0.54842 | MNV      | 7993270 | -0.48041 | 7.375885 | -4.26157 | 0.000455 | 0.101939 | 0.098385 | MMPK3     | 8051707 | 0.245612 | 7.46096  | 3.746374  | 0.001443 | 0.318444 | -1.00679 |
| RALG5P1   | 8159749 | 0.561224 | 1.95621  | 3.952741  | 0.000908 | 0.202973 | -0.56283 | MTX1     | 7995838 | -0.39544 | 1.177958 | -4.25994 | 0.000456 | 0.101939 | 0.080374 | FAM185A   | 8140461 | 0.382178 | 7.217166 | 3.744937  | 0.001448 | 0.318444 | -1.01954 |
| #NV       | 7894043 | -0.28178 | 2.706887 | -0.94296  | 0.000915 | 0.2032   | -0.56941 | ATG2B    | 7981217 | -0.35125 | 7.901307 | -4.2518  | 0.000465 | 0.103121 | 0.064315 | ALG10 /// | 7954777 | -0.25862 | 6.938194 | -3.738695 | 0.001452 | 0.318444 | -1.02477 |
| SNORD11E  | 7981996 | -0.50116 | 10.61273 | -3.94387  | 0.000927 | 0.204311 | -0.5796  | HY2      | 8121850 | -0.54476 | 6.147121 | -4.24608 | 0.000471 | 0.103301 | 0.053018 | C1D       | 8052688 | 0.507766 | 6.475387 | 3.737318  | 0.001474 | 0.318444 | -1.03447 |
| BAMBI     | 7926875 | -0.51788 | 6.737884 | -3.93568  | 0.000944 | 0.205389 | -0.5951  | PEV3     | 8061447 | 0.383704 | 7.429226 | 4.245104 | 0.000472 | 0.103301 | 0.051095 | LRPP3L    | 8051882 | 0.281425 | 6.297828 | 3.735652  | 0.001479 | 0.318444 | -1.03638 |
| #NV       | 7917276 | -0.33918 | 2.82336  | -3.93538  | 0.000944 | 0.205389 | -0.59567 | KLF11    | 8040211 | 0.285410 | 7.103212 | 4.238577 | 0.000479 | 0.104136 | 0.038213 | PEBP4     | 8149725 | 0.649556 | 6.490849 | 3.729403  | 0.001496 | 0.318444 | -1.04564 |
| SNORD11E  | 7987020 | -0.90207 | 5.02516  | -3.93213  | 0.000951 | 0.205389 | -0.60182 | FLI1     | 8013191 | 0.494004 | 5.310041 | 4.23238  | 0.000485 | 0.104589 | 0.025982 | SH2B1     | 7994445 | -0.31562 | 5.435951 | -3.73042  | 0.001499 | 0.318444 | -1.04741 |
| KIAA0100  | 801666  | 0.220127 | 8.044027 | 3.929885  | 0.000956 | 0.205389 | -0.60607 | TMEM154  | 8103026 | 1.587159 | 6.131823 | 4.230518 | 0.000487 | 0.104589 | 0.022304 | LOC10519  | 8071355 | -0.4459  | 3.246776 | -3.7277   | 0.001505 | 0.318444 | -1.05049 |
| PDHA1     | 8183933 | 0.382477 | 8.343663 | 3.919794  | 0.000978 | 0.207285 | -0.62516 | BLM1     | 8044225 | 0.50027  | 6.123542 | -4.2232  | 0.000495 | 0.104589 | 0.007857 | ACAP2     | 8092933 | 0.271382 | 7.126249 | 3.727472  | 0.001506 | 0.318444 | -1.05099 |
| PIIB      | 7989619 | 0.280539 | 10.60964 | 3.916162  | 0.000986 | 0.207285 | -0.63204 | MNV      | 8097116 | -0.69832 | 5.824057 | -4.22278 | 0.000496 | 0.104589 | 0.007028 | C2orf72   | 8061129 | 0.309328 | 6.536539 | 3.724787  | 0.001515 | 0.318444 | -1.05572 |
| TWSG1     | 8020090 | 0.515296 | 8.549973 | 3.913049  | 0.000993 | 0.207285 | -0.63793 | FRMD4B   | 8088745 | -0.38784 | 8.333177 | -4.21259 | 0.000503 | 0.104589 | -0.00656 | MNV       | 8106516 | 0.281197 | 6.354398 | 3.723166  | 0.001521 | 0.318444 | -1.05823 |
| TGMB1     | 7989107 | -0.63109 | 9.914981 | -3.8701   | 0.00101  | 0.207285 | -0.64403 | HTA1     | 7931937 | 0.65206  | 6.28241  | 4.21216  | 0.000508 | 0.104589 | 0.001478 | MNV       | 7955579 | -0.21907 | 7.770432 | -3.71042  | 0.001521 | 0.318444 | -1.06047 |
| LOC10050  | 7949955 | 0.48003  | 6.979661 | 3.91165   | 0.001006 | 0.207285 | -0.64058 | RF1      | 7903709 | 0.151836 | 7.899423 | 4.20705  | 0.000513 | 0.104589 | -0.02373 | MNV       | 8160953 | 0.240748 | 7.20234  | 3.70591   | 0.001581 | 0.316412 | -0.98652 |
| NIDP2T9   | 7951893 | -0.31378 | 4.10848  | -0.86467  | 0.001031 | 0.20829  | -0.6693  | RFX5     | 7919971 | 0.371793 | 6.086236 | 4.205676 | 0.000515 | 0.104589 | -0.02675 | TOR1AIP1  | 7922468 | 0.369697 | 5.411309 | 3.700597  | 0.001598 | 0.328511 | -1.09822 |
| TUBG1     | 8007502 | 0.376479 | 8.206375 | 3.894663  | 0.001035 | 0.20829  | -0.67273 | MNV      | 7916775 | -0.77114 | 5.60255  | -4.20553 | 0.000515 | 0.104589 | -0.02704 | PM21      | 8067017 | 0.390441 | 6.00241  | 3.695439  | 0.001618 | 0.330662 | -1.10843 |
| #NV       | 7919137 | -0.33893 | 1.89328  | -3.89108  | 0.001038 | 0.20829  | -0.67573 | DYNC1H1  | 7978768 | 0.26056  | 8.514497 | 4.203617 | 0.000517 | 0.104589 | -0.03082 | DPM3      | 8163107 | 0.630463 | 5.92408  | 3.692374  | 0.001629 | 0.330812 | -1.11399 |
| SNORD11E  | 7981992 | -0.33429 | 11.22942 | -3.8831   | 0.001062 | 0.20829  | -0.69463 | MNV      | 8180246 | -0.61457 | 6.899692 | -4.19926 | 0.000523 | 0.104589 | -0.03942 | MNV       | 7992756 | -0.79922 | 2.345337 | -3.68469  | 0.001658 | 0.332515 | -1.12772 |
| SNORD11E  | 7981986 | -0.33429 | 11.22942 | -3.8831   | 0.001062 | 0.20829  | -0.69463 | C1orf81  | 8020308 | 0.340309 | 8.600428 | 4.194195 | 0.000528 | 0.104589 | -0.04944 | OSBP1L    | 7965064 | 0.434311 | 7.260234 | 3.682785  | 0.001665 | 0.332515 | -1.13175 |
| FBXO2     | 7912473 | 0.607956 | 8.580583 | 3.882774  | 0.001063 | 0.20829  | -0.69524 | EPH81    | 8082846 | -0.79536 | 4.351744 | -4.19264 | 0.00053  | 0.104589 | -0.05252 | MNV       | 7893150 | -0.37304 | 6.078217 | -3.68249  |          |          |          |

|           |          |          |           |           |          |          |          |           |          |          |           |           |          |          |          |           |          |           |           |           |          |          |          |
|-----------|----------|----------|-----------|-----------|----------|----------|----------|-----------|----------|----------|-----------|-----------|----------|----------|----------|-----------|----------|-----------|-----------|-----------|----------|----------|----------|
| MTMR10    | 7987048  | -0.26193 | 8.831583  | -6.4957   | 0.001794 | 0.221643 | -1.13705 | PIBF1     | 7969390  | -0.31221 | 6.445221  | -3.90257  | 0.001017 | 0.129046 | -0.62719 | ULK1      | 7959957  | -0.40484  | 7.078957  | -3.44419  | 0.00284  | 0.351451 | -1.55953 |
| SLC16A12  | 7943936  | -0.84692 | 4.256379  | -6.6494   | 0.001794 | 0.221643 | -1.13734 | AMDH01    | 7957654  | -0.98885 | 8.798245  | -3.9028   | 0.001017 | 0.129046 | -0.62775 | ULK1      | 8065196  | -0.41058  | 4.374004  | -4.34704  | 0.002885 | 0.351451 | -1.57235 |
| SLC16A12  | 7958015  | -0.51963 | 5.302723  | -6.6494   | 0.001796 | 0.221643 | -1.13705 | ADADT     | 7970765  | -0.9506  | 9.799298  | -3.9028   | 0.001018 | 0.129046 | -0.62865 | GABRE /// | 8056636  | -0.93078  | 6.186229  | -3.4361   | 0.002901 | 0.351451 | -1.57671 |
| SLC16A12  | 8006028  | -0.60522 | 3.950711  | -6.6407   | 0.0018   | 0.221643 | -1.13988 | CEPB3     | 7935011  | -0.42832 | 6.882543  | -3.89939  | 0.001024 | 0.129046 | -0.6335  | ULK1      | 8128245  | -0.52352  | 5.294668  | -3.42749  | 0.002947 | 0.351451 | -1.58948 |
| DLD       | 8014285  | 0.41835  | 8.124891  | -3.64809  | 0.001806 | 0.221643 | -1.14284 | SLC25A20  | 8028724  | 0.518462 | 8.579656  | -3.89854  | 0.001026 | 0.129046 | -0.63523 | KIAA0196  | 8152782  | 0.22185   | 7.399615  | -3.42779  | 0.002952 | 0.351451 | -1.59076 |
| Clorf122  | 7900192  | 0.36451  | 5.182256  | -3.642133 | 0.001824 | 0.221643 | -1.15113 | CS7B      | 8070701  | 0.43526  | 7.923635  | -3.89747  | 0.001027 | 0.129046 | -0.63636 | RN5S119   | 8055149  | -0.5111   | 4.855349  | -3.42494  | 0.002964 | 0.351451 | -1.59405 |
| LOC10050  | 8008078  | 0.41157  | 6.962794  | -3.64209  | 0.001824 | 0.221643 | -1.15121 | CS7B      | 8180255  | 0.72151  | 6.245055  | -3.89603  | 0.001025 | 0.129046 | -0.64299 | UNK       | 7984650  | -0.77374  | 2.754309  | -3.42074  | 0.002996 | 0.351451 | -1.60269 |
| SLC11A1   | 8051031  | 0.340849 | 5.28498   | -3.64089  | 0.001824 | 0.221643 | -1.15121 | CS7B      | 8086263  | 0.23151  | 7.249587  | -3.89603  | 0.001025 | 0.129046 | -0.64299 | MBIP      | 7978566  | 0.322341  | 3.73079   | -3.41987  | 0.003    | 0.351451 | -1.60651 |
| UGT1      | 8045090  | 0.364933 | 8.443343  | -3.64007  | 0.001829 | 0.221643 | -1.15371 | GP88A /// | 7904930  | -0.38731 | 5.737882  | -3.8916   | 0.001042 | 0.129046 | -0.64894 | NOSP      | 8038395  | -0.2943   | 4.89343   | -3.41799  | 0.003011 | 0.351451 | -1.60652 |
| SLC17A5   | 8127549  | 0.358483 | 7.447238  | -3.64005  | 0.001832 | 0.221643 | -1.15516 | SULF2     | 8066822  | -0.80851 | 8.181016  | -3.89747  | 0.001046 | 0.129046 | -0.65263 | ALG10 /// | 7954789  | 0.241229  | 7.005036  | -3.417057 | 0.003017 | 0.351451 | -1.60818 |
| TSTA3     | 8153474  | 0.411763 | 7.285439  | -3.639832 | 0.001833 | 0.221643 | -1.15549 | HNV       | 7944147  | 0.330032 | 3.773168  | -3.89862  | 0.001046 | 0.129046 | -0.65276 | LAMAS     | 8067409  | -0.5234   | 3.68012   | -3.41694  | 0.003018 | 0.351451 | -1.60839 |
| H2AFY2    | 7928107  | 0.58766  | 5.157024  | -3.638856 | 0.001838 | 0.221643 | -1.15785 | HNV       | 7901456  | -0.62871 | 6.623663  | -3.88457  | 0.001058 | 0.129762 | -0.66291 | SNORD13P  | 8132623  | -0.49026  | 5.32006   | -3.41654  | 0.00302  | 0.351451 | -1.60911 |
| ELOVL4    | 8123920  | 0.792387 | 8.808599  | -3.637169 | 0.001844 | 0.221643 | -1.16053 | HNV       | 7982705  | -0.5738  | 7.339449  | -3.8893   | 0.00106  | 0.129762 | -0.66418 | STXBPA    | 8008566  | 0.322044  | 5.37095   | -3.41646  | 0.003021 | 0.351451 | -1.60925 |
| C1QL4     | 7963061  | -0.33056 | 3.233133  | -3.63711  | 0.001844 | 0.221643 | -1.16065 | ART4      | 7929322  | -0.40621 | 3.832305  | -3.87927  | 0.001071 | 0.130162 | -0.67342 | UNK       | 7984406  | -0.34621  | 10.44998  | -3.41515  | 0.00303  | 0.351451 | -1.61161 |
| HNV       | 7981523  | -0.43664 | 3.891333  | -3.63624  | 0.001848 | 0.221643 | -1.1623  | C10orf62  | 7929674  | -0.8343  | 5.896426  | -3.87796  | 0.001074 | 0.130104 | -0.67602 | PPP1R14B  | 7949060  | -0.24015  | 7.511319  | -3.41489  | 0.003031 | 0.351451 | -1.61206 |
| RHOX1F    | 8114755  | -0.22082 | 3.094433  | -3.63655  | 0.00185  | 0.221643 | -1.1634  | FOU1H /// | 7948258  | -0.4582  | 8.645299  | -3.87631  | 0.001078 | 0.130104 | -0.6793  | MMP17     | 7959946  | -0.23353  | 7.282824  | -3.41414  | 0.00306  | 0.351451 | -1.6134  |
| IQCI-SCHF | 8083677  | 0.530597 | 7.170171  | -3.632387 | 0.001864 | 0.221643 | -1.16959 | SGB3      | 8100318  | 0.506436 | 7.158806  | -3.87591  | 0.001081 | 0.130104 | -0.68151 | UNK       | 7908885  | 0.349683  | 7.109666  | -3.413451 | 0.003041 | 0.351451 | -1.61644 |
| 8062842   | -0.36927 | 3.820621 | -3.63231  | 0.001864  | 0.221643 | -1.16973 | IFICE    | 8152323   | -0.32611 | 5.917585 | -3.87464  | 0.001082  | 0.130104 | -0.68276 | RNCD10B  | 8034986   | -0.26503 | 4.821867  | -3.4128   | 0.003046  | 0.351451 | -1.6158  |          |
| VTAL      | 8163964  | 0.33476  | 5.352408  | -3.63189  | 0.001866 | 0.221643 | -1.1704  | KIAA1804  | 7910600  | -0.40638 | 5.538647  | -3.87139  | 0.00109  | 0.130358 | -0.68905 | PHFE      | 8169969  | 0.28915   | 5.96307   | -3.41223  | 0.003049 | 0.351451 | -1.61665 |
| 8122348   | 0.297564 | 7.917415 | -3.629213 | 0.001877  | 0.221643 | -1.17156 | HMO4     | 7987772   | 0.465457 | 5.913824 | -3.868732 | 0.001097  | 0.130887 | -0.69493 | FAM59B   | 8040632   | -0.26187 | 4.236227  | -3.42117  | 0.00305   | 0.351451 | -1.61693 |          |
| SPR1      | 8125941  | 0.308458 | 7.06191   | -3.628949 | 0.001878 | 0.221643 | -1.17161 | HNV       | 7983530  | 0.383535 | 10.21835  | -3.865387 | 0.001105 | 0.130413 | -0.70097 | UNK       | 7985764  | 0.447485  | 2.501407  | -3.41697  | 0.003053 | 0.351451 | -1.61778 |
| SELL1     | 7980547  | 0.370454 | 5.110985  | -3.62834  | 0.001881 | 0.221643 | -1.17725 | LMNR2     | 8032491  | 0.264487 | 5.474876  | -3.85758  | 0.001127 | 0.133507 | -0.71809 | UNK       | 8119716  | -0.21429  | 7.379875  | -3.41055  | 0.003061 | 0.351451 | -1.61984 |
| HCA83     | 7967322  | -0.53805 | 2.710666  | -3.62679  | 0.001882 | 0.221643 | -1.17793 | FLJ3360   | 8110882  | -0.73208 | 4.724938  | -3.85707  | 0.001139 | 0.13417  | -0.7274  | HEY2      | 8121805  | -0.437406 | 1.47121   | -3.409293 | 0.003069 | 0.351451 | -1.62209 |
| ATOH      | 7933978  | -0.55065 | 6.443289  | -3.62765  | 0.001884 | 0.221643 | -1.17856 | C11orf71  | 7951781  | -0.35431 | 4.797607  | -3.85908  | 0.001141 | 0.13417  | -0.72956 | KYNU      | 8045539  | 0.29274   | 8.846854  | -3.40735  | 0.003083 | 0.351451 | -1.62557 |
| MC7       | 7928318  | 0.28969  | 6.584869  | -3.625803 | 0.001903 | 0.222651 | -1.18721 | MVP       | 7994659  | 0.459814 | 5.772679  | -3.84982  | 0.001144 | 0.13417  | -0.73186 | UNK       | 7982832  | 0.519318  | 6.909038  | -3.40369  | 0.003108 | 0.351451 | -1.63212 |
| 8054866   | -0.61573 | 7.331346 | -3.62248  | 0.001906  | 0.222651 | -1.18834 | CYP26A1  | 7929322   | -1.60585 | 6.643954 | -3.84401  | 0.001159  | 0.134695 | -0.7434  | VT1      | 8122348   | 0.279047 | 7.917415  | -3.403364 | 0.00311   | 0.351451 | -1.63271 |          |
| HNV       | 8094625  | 0.10125  | 7.422276  | -3.616225 | 0.001993 | 0.224632 | -1.20019 | HNV       | 7994531  | -0.73197 | 5.930135  | -3.84029  | 0.001162 | 0.134695 | -0.74559 | HINT2     | 8161147  | 0.29068   | 9.614563  | -3.40101  | 0.00312  | 0.351451 | -1.63514 |
| STAT6     | 7964360  | -0.28963 | 8.631733  | -3.61499  | 0.001938 | 0.224632 | -1.20254 | HNV       | 8180202  | -0.82108 | 6.09462   | -3.84207  | 0.001164 | 0.134695 | -0.74724 | UNK       | 7985531  | -0.68937  | 4.315986  | -3.40176  | 0.003121 | 0.351451 | -1.63536 |
| RAE1      | 8063566  | 0.28189  | 6.226038  | -3.613855 | 0.001943 | 0.224632 | -1.20468 | HNV       | 8190677  | -0.27489 | 6.941042  | -3.84185  | 0.001165 | 0.134695 | -0.74768 | SMAD6     | 7984353  | -0.29187  | 6.57176   | -3.40129  | 0.003125 | 0.351451 | -1.63643 |
| HNV       | 8192593  | -0.49026 | 4.622439  | -3.61088  | 0.001956 | 0.2247   | -1.21032 | METT121C  | 7969555  | -0.82517 | 4.641479  | -3.83666  | 0.001179 | 0.135801 | -0.75797 | UNK       | 7983079  | 0.417414  | 7.570113  | -3.39882  | 0.003142 | 0.351451 | -1.64091 |
| 8079939   | 0.932286 | 4.395939 | -3.610631 | 0.001957  | 0.2247   | -1.21078 | HNV      | 8169000   | -0.50846 | 8.481486 | -3.82924  | 0.001198  | 0.137508 | -0.77269 | GNP3     | 7966321   | 0.380412 | 5.955434  | -3.398787 | 0.003142  | 0.351451 | -1.64096 |          |
| DCIF      | 8007917  | 0.44705  | 3.940784  | -3.60856  | 0.001975 | 0.225207 | -1.2185  | VTG911-1  | 8108627  | 0.13813  | 6.001697  | -3.82903  | 0.001202 | 0.137508 | -0.775   | UNK       | 7954568  | 0.32746   | 4.596977  | -3.39704  | 0.003146 | 0.351451 | -1.64405 |
| HNV       | 7918876  | -0.43061 | 4.000429  | -3.60689  | 0.002    | 0.226005 | -1.22923 | LOC100132 | 7933261  | -0.55373 | 4.607331  | -3.82332  | 0.001215 | 0.138021 | -0.78445 | GIB3      | 7999932  | -0.24449  | 4.68453   | -3.39455  | 0.003172 | 0.351451 | -1.64845 |
| HNV       | 7986446  | -0.64996 | 6.166601  | -3.60602  | 0.002001 | 0.226005 | -1.22974 | ACSA1     | 7935172  | 0.253166 | 7.244018  | -3.82099  | 0.001221 | 0.138272 | -0.78907 | GPTR8P    | 8081676  | 0.27553   | 5.969436  | -3.39359  | 0.003179 | 0.351451 | -1.65035 |
| RCF3      | 8096353  | 0.312915 | 6.043501  | -3.604013 | 0.002002 | 0.226005 | -1.23013 | COP1      | 7975598  | 0.84251  | 9.921335  | -3.817049 | 0.001232 | 0.138397 | -0.79689 | FOPNL     | 7999718  | 0.290938  | 6.931964  | -3.393333 | 0.003181 | 0.351451 | -1.65068 |
| SULF2     | 8066822  | 0.747764 | 6.183016  | -3.597498 | 0.002015 | 0.226718 | -1.23565 | ZNF69     | 8029568  | -0.3516  | 7.9015    | -3.81342  | 0.001242 | 0.138397 | -0.80408 | ADAT3     | 8024356  | -0.27479  | 5.413455  | -3.39048  | 0.003201 | 0.351451 | -1.65579 |
| HNV       | 7982611  | 0.4674   | 8.090232  | -3.595946 | 0.002022 | 0.226741 | -1.23858 | C11orf83  | 7949694  | 0.296892 | 4.223516  | -3.81328  | 0.001242 | 0.138397 | -0.80428 | NSUN5 /// | 8139947  | -0.26539  | 6.583087  | -3.38815  | 0.003218 | 0.351451 | -1.65996 |
| ZNF577    | 8038904  | -0.3352  | 6.60833   | -3.59402  | 0.002031 | 0.226956 | -1.24223 | ALDH5A1   | 8117270  | -0.25409 | 8.89434   | -3.81031  | 0.001251 | 0.138397 | -0.81027 | LOC100121 | 8017344  | 0.466594  | 6.599996  | -3.387865 | 0.00322  | 0.351451 | -1.66048 |
| LOC10063  | 7922351  | -0.51966 | 7.40738   | -3.58665  | 0.002065 | 0.229296 | -1.25618 | PH4A1     | 8174408  | -0.34153 | 6.409374  | -3.80849  | 0.001256 | 0.138397 | -0.81388 | SIGLEC12  | 8038852  | -0.26299  | 3.988818  | -3.38539  | 0.003237 | 0.351451 | -1.66649 |
| ATP6V1B2  | 8144931  | 0.234061 | 8.884514  | -3.586453 | 0.002066 | 0.229296 | -1.25655 | HAL       | 7966006  | -0.8899  | 9.015643  | -3.80727  | 0.001259 | 0.138397 | -0.8163  | UNK       | 7986186  | 0.364374  | 10.02907  | -3.383943 | 0.003248 | 0.351451 | -1.66675 |
| HNV       | 8096025  | -0.32879 | 3.934322  | -3.58083  | 0.002092 | 0.229377 | -1.2672  | FKBP1A-SC | 8064418  | 0.499432 | 5.050999  | -3.806895 | 0.001216 | 0.138397 | -0.81704 | UNK       | 8066459  | 0.406716  | 3.465311  | -3.383287 | 0.003253 | 0.351451 | -1.66877 |
| APC2 ///  | 8029547  | -0.38834 | 6.808804  | -3.58006  | 0.002093 | 0.229377 | -1.26777 | HNV       | 7985857  | -0.51316 | 7.83354   | -3.80558  | 0.001224 | 0.138397 | -0.81965 | ZNF42     | 8052834  | 0.320781  | 7.160239  | -3.38273  | 0.003257 | 0.351451 | -1.66987 |
| TSST2     | 8018187  | 0.26025  | 5.184646  | -3.58052  | 0.0021   | 0.229377 | -1.26875 | CFH2      | 7975322  | 0.28325  | 6.20585   | -3.80473  | 0.001217 | 0.138397 | -0.82195 | CFH2      | 7951563  | 0.44061   | 4.36628   |           |          |          |          |

|            |         |          |          |          |          |          |          |          |         |           |          |           |          |          |          |            |         |           |          |           |          |          |          |
|------------|---------|----------|----------|----------|----------|----------|----------|----------|---------|-----------|----------|-----------|----------|----------|----------|------------|---------|-----------|----------|-----------|----------|----------|----------|
| MT1P       | 7959834 | -0.36792 | 6.470458 | -3.44013 | 0.00286  | 0.242378 | -1.5331  | MNV      | 8150214 | -0.40152  | 5.642976 | -3.61674  | 0.00193  | 0.163974 | -1.19403 | MNV        | 8165696 | -0.6388   | 11.20708 | -2.5586   | 0.004317 | 0.36437  | -1.8964  |
| PAC3IN3    | 7947801 | -0.38849 | 6.512889 | -4.4397  | 0.00268  | 0.242378 | -1.5331  | MNV      | 8088445 | -0.42875  | 7.245242 | -3.61459  | 0.00194  | 0.164076 | -1.19828 | ANOV6      | 7954997 | 0.2783    | 9.119777 | 7.325374  | 0.004438 | 0.36437  | -1.9002  |
| TPP2       | 7973142 | -0.65046 | 6.037695 | -3.4378  | 0.002875 | 0.242378 | -1.53582 | RN55S05  | 8076836 | -0.38382  | 8.286675 | -3.61521  | 0.001951 | 0.164076 | -1.20321 | BRD1       | 8076836 | -0.31477  | 5.791927 | -2.2535   | 0.004434 | 0.36437  | -1.9006  |
| GM2A       | 8109344 | 0.326567 | 8.135033 | 3.438035 | 0.002879 | 0.242378 | -1.53707 | MNV      | 7929664 | -0.45208  | 7.481821 | -3.61676  | 0.001956 | 0.164076 | -1.20585 | MKRA5      | 8171172 | 0.528711  | 6.023649 | 3.253104  | 0.004434 | 0.36437  | -1.9031  |
| MNV        | 7952513 | 0.374552 | 7.611679 | 3.437449 | 0.002883 | 0.242378 | -1.53817 | RAP2A    | 7969633 | -0.37867  | 6.644343 | -3.61086  | 0.001959 | 0.164076 | -1.2072  | SNORD43    | 8071223 | -0.94739  | 6.058736 | -2.2506   | 0.004434 | 0.36437  | -1.9034  |
| MT1P2      | 7952513 | -0.35582 | 6.353396 | -3.434   | 0.00295  | 0.242494 | -1.54467 | MNV      | 7909794 | -0.42186  | 3.459817 | -3.60971  | 0.001961 | 0.164076 | -1.20794 | ACP6       | 7919326 | 0.504296  | 7.254038 | 3.250073  | 0.004373 | 0.365865 | -1.90671 |
| MNV        | 7959887 | -0.36805 | 8.007654 | -3.4339  | 0.00295  | 0.242494 | -1.54467 | MNAV3    | 8051707 | -0.23658  | 7.469065 | -3.60856  | 0.001966 | 0.164076 | -1.21027 | ARFP2      | 7946201 | -0.21382  | 6.722995 | -3.24254  | 0.004447 | 0.370312 | -1.92015 |
| SEMAAG     | 7959887 | -0.36805 | 8.007654 | -3.43395 | 0.00296  | 0.242494 | -1.54467 | GM2A     | 8109343 | 0.341673  | 7.845793 | -3.60972  | 0.001972 | 0.164076 | -1.21341 | SNV6       | 8151572 | 0.348923  | 3.178752 | 3.24234   | 0.004447 | 0.370312 | -1.92047 |
| AK3        | 8159945 | 0.266449 | 5.984354 | 3.432071 | 0.002917 | 0.242715 | -1.54832 | ZNF383   | 8028227 | -0.41869  | 6.494063 | -3.60674  | 0.001974 | 0.164076 | -1.21382 | ANGEL2     | 7924190 | 0.211729  | 6.570669 | -3.23993  | 0.004473 | 0.370312 | -1.92485 |
| MNV        | 7892948 | -0.35774 | 7.25252  | -3.4117  | 0.00293  | 0.242715 | -1.54996 | MNV      | 8036989 | -0.45593  | 7.326768 | -3.60533  | 0.001976 | 0.164076 | -1.21464 | RNS5443    | 8016213 | -0.67982  | 3.911382 | -3.2393   | 0.004481 | 0.370312 | -1.92622 |
| MNV        | 7930915 | -0.44049 | 9.321971 | -3.4298  | 0.00293  | 0.242872 | -1.55261 | CENP7    | 8013015 | -0.46685  | 7.116961 | -3.60116  | 0.001999 | 0.165572 | -1.22486 | SNORD13    | 8145793 | -0.30955  | 12.29964 | -3.23899  | 0.004482 | 0.370312 | -1.92647 |
| NQ01       | 8002303 | 0.406208 | 6.034905 | 3.424708 | 0.00296  | 0.243668 | -1.56262 | YKT6     | 8132580 | -0.41465  | 7.036884 | -3.59885  | 0.002005 | 0.165634 | -1.22739 | CREBRF     | 8110032 | 0.295276  | 5.732701 | 3.236022  | 0.004511 | 0.371468 | -1.93175 |
| PDP        | 7942715 | -0.37907 | 5.310045 | -3.42442 | 0.00298  | 0.243668 | -1.56275 | MNV      | 8097062 | -0.37102  | 6.387812 | -3.59599  | 0.002022 | 0.166198 | -1.23509 | XTBP3      | 8905341 | 0.249672  | 6.918873 | 3.23289   | 0.004543 | 0.371468 | -1.93731 |
| OMH        | 8088384 | 0.280664 | 7.481004 | 3.424027 | 0.00297  | 0.243668 | -1.56349 | OR3A1    | 8011337 | -0.29486  | 6.284096 | -3.59599  | 0.002027 | 0.166198 | -1.23719 | MNV        | 7907652 | 0.335511  | 6.387812 | 3.23245   | 0.004547 | 0.371468 | -1.93781 |
| RFK        | 8161857 | 0.448859 | 6.858016 | 3.42381  | 0.002971 | 0.243668 | -1.56374 | PPPAR1   | 8022251 | -0.30262  | 6.650342 | -3.59479  | 0.002031 | 0.166198 | -1.23888 | KLIF6      | 8032365 | -0.65736  | 5.869034 | -2.23136  | 0.004558 | 0.371468 | -1.94005 |
| MNV        | 8031867 | -0.76407 | 7.067451 | -3.4216  | 0.002986 | 0.244117 | -1.56807 | EYS      | 8127391 | -0.36142  | 6.181775 | -3.59121  | 0.002044 | 0.166198 | -1.24455 | HP55       | 7946898 | -0.20546  | 7.681166 | -1.22088  | 0.004563 | 0.371468 | -1.94109 |
| MNV        | 7892633 | -0.5588  | 9.301479 | -3.42023 | 0.002995 | 0.244117 | -1.57065 | MNV      | 7911349 | -0.25632  | 4.243503 | -3.58972  | 0.002051 | 0.166198 | -1.24749 | PCMTD7     | 8150714 | 0.30395   | 8.398789 | 3.230701  | 0.004565 | 0.371468 | -1.94233 |
| HPGD       | 8103769 | 0.739077 | 6.100757 | 3.419765 | 0.002999 | 0.244117 | -1.57152 | SECL3    | 8085300 | -0.24598  | 7.539606 | -3.58903  | 0.002054 | 0.166198 | -1.24876 | HOXC9      | 7955865 | -0.22844  | 2.869488 | -3.22727  | 0.0046   | 0.371468 | -1.94373 |
| COG6       | 7959591 | 0.285253 | 6.289914 | 3.418533 | 0.00307  | 0.244192 | -1.57385 | HRV4M03  | 8110793 | -0.40984  | 7.494847 | -3.58494  | 0.002075 | 0.166198 | -1.25794 | NEK7       | 7905543 | 0.395227  | 7.801851 | 3.225738  | 0.004615 | 0.371468 | -1.95007 |
| CDOH       | 8026900 | -0.62442 | 6.668384 | -3.41728 | 0.003015 | 0.24428  | -1.57621 | RIC7R    | 8116998 | -0.31222  | 7.699955 | -3.58423  | 0.002076 | 0.166198 | -1.25836 | WDR74      | 7948894 | 0.52487   | 5.973884 | -3.22509  | 0.004622 | 0.371468 | -1.95122 |
| NV         | 7979044 | 0.352013 | 5.910172 | 3.411661 | 0.003052 | 0.245781 | -1.58643 | GRCS     | 8096361 | -0.6641   | 5.276742 | -3.585    | 0.00208  | 0.166198 | -1.2598  | LCORL      | 8099581 | 0.250576  | 6.072208 | 3.225058  | 0.004622 | 0.371468 | -1.95128 |
| IP09       | 7908732 | 0.216746 | 7.968774 | 3.41173  | 0.003053 | 0.245781 | -1.58667 | MNV      | 7984385 | 0.408646  | 7.667171 | -3.58344  | 0.002081 | 0.166198 | -1.26051 | MNV        | 7892639 | -0.56036  | 5.78182  | -2.22471  | 0.004626 | 0.371468 | -1.95219 |
| MNV        | 7895846 | 0.591743 | 8.883312 | 3.41127  | 0.003056 | 0.245781 | -1.58754 | NDFP2    | 790544  | -0.31997  | 3.232701 | -3.5822   | 0.002086 | 0.166198 | -1.26238 | LAG3       | 7953418 | -0.37672  | 5.105622 | -3.22433  | 0.00463  | 0.371468 | -1.95157 |
| BID        | 8074261 | 0.358877 | 7.231549 | 3.409149 | 0.00307  | 0.245991 | -1.59154 | MNV      | 8086181 | -0.54519  | 4.289664 | -3.58152  | 0.002089 | 0.166198 | -1.26373 | PP19R /    | 8016628 | -0.32511  | 5.56182  | -3.22092  | 0.00466  | 0.373381 | -1.95864 |
| MNV        | 8040415 | -0.38849 | 4.091487 | -3.40827 | 0.003073 | 0.245991 | -1.59234 | IHH      | 8059067 | -0.24465  | 4.182923 | -3.58256  | 0.00209  | 0.166198 | -1.26423 | FAM72A //  | 8039928 | 0.363831  | 3.101937 | 3.219438  | 0.004666 | 0.374422 | -1.96396 |
| MNV        | 7943193 | 0.243891 | 3.950779 | 3.406152 | 0.003091 | 0.246813 | -1.59719 | VP518    | 7982485 | 0.347456  | 5.906933 | -3.58172  | 0.00209  | 0.166198 | -1.26441 | ZFP161     | 8022110 | 0.210209  | 7.124049 | 3.214998  | 0.0047   | 0.374422 | -1.96474 |
| IL3BRA2    | 8109348 | 0.612809 | 6.460251 | 3.403036 | 0.003111 | 0.247674 | -1.60255 | SNORA70F | 8056359 | -0.37624  | 6.131067 | -3.58051  | 0.002094 | 0.166198 | -1.26573 | MNV        | 7894146 | -0.42678  | 6.515099 | -3.2122   | 0.004756 | 0.376495 | -1.97419 |
| ARF1 // NV | 7910229 | 0.249694 | 10.01941 | 3.39987  | 0.003135 | 0.247674 | -1.60902 | FBXO4    | 8100111 | -0.46197  | 5.545258 | -3.57753  | 0.002108 | 0.166198 | -1.27162 | MNV        | 7983849 | 0.601439  | 6.579002 | 3.218772  | 0.004759 | 0.376495 | -1.97475 |
| MNV        | 8158671 | -0.39157 | 11.78321 | -3.39966 | 0.003136 | 0.247674 | -1.60942 | ALDH6A1  | 8098528 | -0.35573  | 10.8461  | -3.57522  | 0.002109 | 0.166198 | -1.27223 | CREG1      | 7922051 | 0.395529  | 8.996797 | 3.211771  | 0.00476  | 0.376495 | -1.97495 |
| SNORD50F   | 8127987 | -0.47377 | 7.062494 | -3.39864 | 0.003143 | 0.247674 | -1.61134 | MNV      | 7972932 | 0.904296  | 3.855159 | -3.57959  | 0.002115 | 0.166198 | -1.27477 | PIAS4      | 8024740 | -0.21975  | 5.873337 | -3.20916  | 0.004788 | 0.377408 | -1.97958 |
| HPGFC      | 8093972 | -0.24078 | 9.025604 | -3.39602 | 0.003162 | 0.247674 | -1.61627 | COBLL1   | 8056343 | -0.24241  | 9.247197 | -3.57571  | 0.002116 | 0.166198 | -1.27522 | NKX01      | 7998668 | -0.25275  | 4.036634 | -3.20849  | 0.004795 | 0.377408 | -1.98077 |
| MNV        | 7959125 | 0.27591  | 4.236564 | 3.392084 | 0.003189 | 0.247674 | -1.61945 | LR2      | 8102673 | -0.3056   | 6.195756 | -3.57481  | 0.002121 | 0.166198 | -1.27579 | HPF25      | 7958158 | 0.198516  | 5.199656 | -3.207431 | 0.004806 | 0.377408 | -1.98265 |
| MNV        | 8166249 | 0.231521 | 5.275361 | 3.390284 | 0.003202 | 0.247674 | -1.62708 | MNV      | 7895941 | 0.883601  | 5.543909 | -3.57523  | 0.002119 | 0.166198 | -1.2762  | POD4 //    | 7998700 | -0.29376  | 6.649377 | -3.20575  | 0.004823 | 0.377408 | -1.9853  |
| SNORD114   | 7957816 | -0.83239 | 3.268982 | -3.38967 | 0.003207 | 0.247674 | -1.62843 | HN1      | 8018305 | -0.34404  | 5.996023 | -3.57463  | 0.002121 | 0.166198 | -1.27735 | TMX1       | 7974303 | 0.405868  | 6.60057  | 3.201975  | 0.004865 | 0.377408 | -1.99236 |
| OXER1      | 8005193 | -0.62227 | 6.829266 | -3.38882 | 0.003213 | 0.247674 | -1.62983 | AGRN     | 7989822 | -0.348024 | 6.242405 | -3.57359  | 0.002127 | 0.16628  | -1.27886 | SLC7A5     | 8003298 | -0.38107  | 5.34422  | -3.20156  | 0.004869 | 0.377408 | -1.99309 |
| SNORD42F   | 8051955 | -0.32547 | 6.039702 | -3.38708 | 0.003216 | 0.247674 | -1.63066 | MNV      | 7893144 | -0.84372  | 6.626385 | -3.56974  | 0.002145 | 0.167241 | -1.28703 | XPMPPE3    | 8073311 | -0.231565 | 4.74209  | 3.201286  | 0.004872 | 0.377408 | -1.99358 |
| CDC99      | 8109830 | 0.416144 | 5.296944 | 3.388333 | 0.003216 | 0.247674 | -1.63076 | KIAA0825 | 8113097 | -0.49869  | 5.676302 | -3.56422  | 0.002171 | 0.16838  | -1.29793 | ANKS1B     | 7965686 | -1.00187  | 6.895156 | -3.20039  | 0.004882 | 0.377408 | -1.99518 |
| ANO10      | 8086467 | 0.395329 | 6.857385 | 3.387803 | 0.003218 | 0.247674 | -1.63124 | CCT6B    | 8041472 | -0.48607  | 4.867404 | -3.56201  | 0.002175 | 0.16838  | -1.29956 | STAG2      | 8169750 | 0.263829  | 7.44392  | 3.19938   | 0.004893 | 0.377408 | -1.99697 |
| MNV        | 8136612 | -0.36274 | 2.480663 | -3.38785 | 0.00322  | 0.247674 | -1.63167 | ABR      | 8010983 | 0.350553  | 5.988546 | -3.563123 | 0.002177 | 0.16838  | -1.30011 | SEC61A2    | 7926189 | 0.35043   | 6.569813 | -3.19875  | 0.004898 | 0.377408 | -1.99787 |
| CSD2       | 8096663 | 0.389438 | 5.995914 | 3.387494 | 0.003222 | 0.247674 | -1.63234 | WNT11    | 8013054 | 0.783535  | 5.098973 | -3.56254  | 0.00218  | 0.16838  | -1.30126 | MNV        | 8171491 | -0.37061  | 4.525857 | -3.19601  | 0.004919 | 0.377408 | -2.00137 |
| EMC1       | 7913110 | 0.285339 | 7.589327 | 3.38639  | 0.00323  | 0.247674 | -1.63442 | TRIP1    | 7967056 | 0.320829  | 6.124604 | -3.56033  | 0.002189 | 0.168752 | -1.30529 | SLC37A4 // | 7952132 | 0.294438  | 9.378301 | 3.18411   | 0.004944 | 0.377408 | -2.00545 |
| MNV        | 8126627 | -0.26029 | 2.33629  | -3.3861  | 0.003232 | 0.247674 | -1.63497 | MNV      | 7891222 | 0.614852  | 6.22640  | -3.556387 | 0.00221  | 0.168752 | -1.31342 | RNS544     | 8021043 | -1.93684  | 7.274088 | -3.19463  | 0.004948 | 0.377408 | -2.00601 |
| MNV        | 7993017 | -0.40715 | 4.55434  | -3.38409 | 0.003247 | 0.247674 | -1.63875 | MNV      | 7961602 | -0.32953  | 4.11457  | -3.55481  | 0.002218 | 0.168752 | -1.31656 | MAP3K8     | 8054997 |           |          |           |          |          |          |

|           |         |          |          |          |          |          |          |            |         |          |          |           |          |          |          |            |         |          |          |          |          |          |          |
|-----------|---------|----------|----------|----------|----------|----------|----------|------------|---------|----------|----------|-----------|----------|----------|----------|------------|---------|----------|----------|----------|----------|----------|----------|
| SNORD114  | 7978626 | -0.64816 | 4.507551 | -3.2846  | 0.004051 | 0.255766 | -1.82574 | MNV        | 7896641 | -0.78886 | 2.662344 | -3.45385  | 0.002779 | 0.176188 | -1.51583 | NQ01       | 8002303 | 0.367904 | 4.035906 | 3.101764 | 0.006068 | 0.3785   | -1.27014 |
| ATG2B     | 7981192 | -0.22514 | 7.922274 | -2.3849  | 0.004061 | 0.255766 | -1.82782 | CYBASC3    | 7944855 | 0.27554  | 5.385857 | 3.45336   | 0.002782 | 0.176188 | -1.51683 | RNU2-1 /// | 8019631 | -0.34309 | 11.77976 | -3.1061  | 0.00607  | 0.3785   | -1.2704  |
| FBX04B    | 8052742 | 0.293651 | 4.952925 | 3.28349  | 0.004067 | 0.255766 | -1.82915 | PRODH      | 8074335 | -0.8006  | 5.244114 | -3.45214  | 0.002779 | 0.176188 | -1.5192  | RNU2-1 /// | 8019633 | -0.34309 | 11.77976 | -3.1061  | 0.00607  | 0.3785   | -1.2704  |
| NUD1T3    | 7978342 | -0.43265 | 5.310278 | -3.2879  | 0.00407  | 0.255766 | -1.82971 | GPANK1     | 8124998 | -0.23881 | 4.505455 | -3.4516   | 0.002793 | 0.176188 | -1.52026 | RNU2-1 /// | 8019635 | -0.34309 | 11.77976 | -3.1061  | 0.00607  | 0.3785   | -1.2704  |
| #NV       | 7981961 | -0.23692 | 6.257289 | -3.28244 | 0.004095 | 0.255766 | -1.83487 | MNV        | 8103725 | -0.2943  | 4.330768 | -3.45614  | 0.002794 | 0.176188 | -1.52054 | RNU2-1 /// | 8019637 | -0.34309 | 11.77976 | -3.1061  | 0.00607  | 0.3785   | -1.2704  |
| SCM1      | 8012823 | 0.27618  | 3.85223  | 3.278128 | 0.004109 | 0.255766 | -1.83788 | FAD3B      | 7896961 | 0.294241 | 6.10186  | 3.45096   | 0.002802 | 0.176188 | -1.52322 | RNU2-1 /// | 8019639 | -0.34309 | 11.77976 | -3.1061  | 0.00607  | 0.3785   | -1.2704  |
| TRO1      | 8151281 | 0.27549  | 3.852021 | 3.27793  | 0.004111 | 0.255766 | -1.83811 | ATAD3      | 7912473 | 0.295298 | 5.840583 | 3.448308  | 0.002814 | 0.176496 | -1.52676 | RNU2-1 /// | 8019641 | -0.34309 | 11.77976 | -3.1061  | 0.00607  | 0.3785   | -1.2704  |
| RL12      | 8120133 | 0.27423  | 4.697202 | -3.2137  | 0.004121 | 0.255766 | -1.83819 | TMEM161    | 8130023 | -0.28938 | 9.331024 | -3.44649  | 0.002817 | 0.176496 | -1.52811 | RNU2-1 /// | 8019709 | -0.34309 | 11.77976 | -3.1061  | 0.00607  | 0.3785   | -1.2704  |
| #NV       | 7896430 | 0.528821 | 8.00337  | 3.273084 | 0.004156 | 0.255766 | -1.84734 | SLC3C1     | 7939590 | 0.672783 | 7.048292 | 3.446847  | 0.002823 | 0.176496 | -1.52962 | RNU2-1 /// | 8019705 | -0.34309 | 11.77976 | -3.1061  | 0.00607  | 0.3785   | -1.2704  |
| MNV       | 7892738 | 0.418369 | 3.783738 | 3.272614 | 0.00416  | 0.255766 | -1.84822 | LOC10050   | 7982020 | -0.67378 | 3.019329 | -3.44645  | 0.002825 | 0.176496 | -1.5304  | RNU2-1 /// | 8019707 | -0.34309 | 11.77976 | -3.1061  | 0.00607  | 0.3785   | -1.2704  |
| MNV       | 7894597 | 0.418369 | 3.783738 | 3.272614 | 0.00416  | 0.255766 | -1.84822 | MNV        | 8152415 | -0.38271 | 3.233929 | -3.44319  | 0.002846 | 0.177144 | -1.53682 | TRMT10A    | 8101916 | 0.325381 | 5.160075 | 3.098213 | 0.006097 | 0.379457 | -1.27394 |
| FAM20B    | 7907680 | 0.200514 | 7.042034 | 3.271894 | 0.004168 | 0.255766 | -1.84977 | PIPL1      | 8126058 | 0.324229 | 5.537911 | 3.443133  | 0.002846 | 0.177144 | -1.53694 | MNV        | 7892838 | 0.327818 | 8.025629 | 3.098213 | 0.006115 | 0.379887 | -1.27635 |
| #NV       | 7896160 | -0.462   | 8.58675  | -3.2717  | 0.004173 | 0.255766 | -1.85092 | KHLH29     | 8044094 | 0.385568 | 6.019472 | 3.440487  | 0.002863 | 0.177835 | -1.54215 | RAD21      | 8152447 | 0.172527 | 7.198372 | 3.103744 | 0.006149 | 0.380987 | -1.28078 |
| SLC23A2   | 8064808 | -0.56278 | 9.263202 | -3.27013 | 0.004177 | 0.255766 | -1.85175 | RAB6A ///  | 8045136 | 0.255023 | 0.937770 | 3.439182  | 0.002871 | 0.177835 | -1.54472 | LOC10011   | 8061483 | -0.40301 | 5.310544 | -3.09494 | 0.00616  | 0.380987 | -1.28174 |
| CHURCH-F1 | 812121  | 0.319161 | 6.858862 | 3.270566 | 0.004179 | 0.255766 | -1.85206 | MNV        | 8154227 | -0.39244 | 3.751796 | -3.43888  | 0.002873 | 0.177835 | -1.54531 | CNO77      | 8149475 | 0.278817 | 8.505684 | 3.096341 | 0.006178 | 0.380987 | -1.28183 |
| LEVO15    | 7979745 | 0.398788 | 1.017493 | 3.265623 | 0.004198 | 0.255766 | -1.85589 | C12orf69   | 9106155 | -0.46823 | 3.848084 | -3.43753  | 0.002882 | 0.17804  | -1.54796 | C5orf51    | 8105404 | 0.281705 | 7.414146 | 3.092614 | 0.006192 | 0.380987 | -1.28425 |
| ERGIC1    | 8109999 | 0.330104 | 9.376765 | 3.268377 | 0.004199 | 0.255766 | -1.85616 | MNV        | 7896300 | 0.450429 | 8.009373 | 3.437535  | 0.002894 | 0.17831  | -1.55151 | HBSL1      | 8129706 | 0.196855 | 7.713277 | 3.092327 | 0.006195 | 0.380987 | -1.28663 |
| #NV       | 7892966 | 0.455607 | 4.832201 | 3.266353 | 0.004206 | 0.255766 | -1.85768 | ZCCHC14    | 8003263 | -0.28296 | 7.609137 | -3.4352   | 0.002897 | 0.17831  | -1.55257 | NUMBL      | 8036923 | -0.22987 | 5.830355 | -3.09187 | 0.006202 | 0.380987 | -1.28783 |
| SNORD11E  | 7919558 | -0.40405 | 9.099429 | -3.267   | 0.004212 | 0.255766 | -1.85874 | C11orf65   | 7951521 | -0.38002 | 4.224925 | -3.43173  | 0.00292  | 0.179214 | -1.55938 | STX10      | 8034631 | 0.27157  | 7.42789  | 3.09561  | 0.006281 | 0.382283 | -1.29782 |
| SNORD11E  | 7919562 | -0.40405 | 9.099429 | -3.267   | 0.004212 | 0.255766 | -1.85874 | C1orf40    | 8146225 | -0.26355 | 6.498281 | -3.43017  | 0.00293  | 0.179214 | -1.55246 | UPLA1      | 8150830 | 0.287263 | 8.468474 | 3.08608  | 0.006281 | 0.382283 | -1.29787 |
| ESY1      | 7956166 | 0.329644 | 9.19394  | 3.266901 | 0.004213 | 0.255766 | -1.85893 | ZMAT3      | 8092230 | 0.680974 | 6.37762  | 3.429905  | 0.002932 | 0.179214 | -1.56318 | KCNJ1      | 8172449 | -0.31346 | 4.54913  | -3.08018 | 0.006295 | 0.382283 | -1.29823 |
| #NV       | 7894668 | 0.330118 | 9.02223  | 3.266004 | 0.004221 | 0.255766 | -1.86061 | RG59       | 8009277 | 0.346242 | 3.931818 | 3.429909  | 0.002933 | 0.179214 | -1.56357 | PLS1       | 8083146 | 0.340159 | 6.729487 | 3.082795 | 0.006327 | 0.382283 | -2.20367 |
| MNV       | 7892968 | 0.268645 | 10.62338 | 3.264647 | 0.004234 | 0.255766 | -1.86315 | MNV        | 8092920 | -0.48446 | 4.330358 | -3.42865  | 0.002934 | 0.179214 | -1.56545 | FEM1B      | 7984470 | 0.24641  | 6.929203 | 3.082484 | 0.006331 | 0.382283 | -2.20427 |
| SLC39A9   | 7912304 | 0.229442 | 8.744013 | 3.264332 | 0.004237 | 0.255766 | -1.86374 | FURIN      | 7986092 | 0.36241  | 9.083367 | 3.427984  | 0.002944 | 0.179214 | -1.56677 | TESK2      | 7915718 | 0.231681 | 1.712171 | 3.081802 | 0.00634  | 0.382283 | -2.20543 |
| SLC9B2    | 8109554 | 0.387443 | 8.614676 | 3.264134 | 0.004239 | 0.255766 | -1.86402 | SPAT2      | 8125247 | 0.33842  | 6.063449 | 3.425929  | 0.002962 | 0.17999  | -1.57219 | MNV        | 7893612 | 0.590636 | 2.98377  | 3.081515 | 0.006344 | 0.382283 | -2.20593 |
| CF9a      | 8162039 | 0.363282 | 6.67803  | 3.263623 | 0.004244 | 0.255766 | -1.86507 | ADHF1E     | 8146687 | -0.37983 | 9.86029  | -3.42298  | 0.002977 | 0.180564 | -1.57661 | MNV        | 7896344 | 0.590636 | 2.98377  | 3.081515 | 0.006344 | 0.382283 | -2.20593 |
| G1G4      | 8121429 | 0.299228 | 6.56402  | 3.263436 | 0.004246 | 0.255766 | -1.86542 | PNF21      | 8011758 | 0.243767 | 1.014698 | 3.421585  | 0.002986 | 0.180564 | -1.57936 | HMGGA1 /// | 8118794 | -0.24567 | 5.008937 | -3.08119 | 0.006349 | 0.382283 | -2.20903 |
| #NV       | 7895135 | 0.53879  | 3.399873 | 3.263134 | 0.004248 | 0.255766 | -1.86599 | RABAC1     | 8030771 | 0.260783 | 7.381457 | 3.419479  | 0.003    | 0.180593 | -1.58351 | TUBE1      | 8128977 | 0.359465 | 6.767606 | 3.08023  | 0.006362 | 0.382283 | -2.20982 |
| MRAS      | 8082965 | 0.360571 | 5.479242 | 3.262313 | 0.004252 | 0.255766 | -1.86664 | RNU10-4P   | 8091855 | -0.45115 | 3.775397 | -3.41826  | 0.003009 | 0.180593 | -1.58591 | ORS21      | 7937948 | -0.24567 | 3.214076 | -3.07977 | 0.006369 | 0.382283 | -2.20982 |
| FANCI     | 7985829 | 0.355142 | 4.13213  | 3.262351 | 0.004256 | 0.255766 | -1.86745 | MNV        | 8064857 | -0.26991 | 8.039014 | -3.41735  | 0.003015 | 0.180593 | -1.58777 | ALFP       | 8049123 | -0.59951 | 3.40532  | -3.07962 | 0.006371 | 0.382283 | -2.20982 |
| PSD3      | 8149555 | -0.43479 | 8.84969  | -3.26184 | 0.004261 | 0.255766 | -1.86841 | KIA03513   | 7979662 | 0.34851  | 5.002613 | 3.416868  | 0.003019 | 0.180593 | -1.589   | MNV        | 7949019 | 0.320848 | 2.807936 | 3.079546 | 0.006372 | 0.382283 | -2.20987 |
| PTN21     | 8079741 | 0.32745  | 6.659936 | 3.26214  | 0.004263 | 0.255766 | -1.86918 | MNV        | 8045476 | -0.35703 | 5.562473 | -3.41659  | 0.00302  | 0.180593 | -1.59119 | HSD11B1    | 8092846 | 0.27745  | 9.85112  | 3.079308 | 0.00642  | 0.385165 | -2.2149  |
| TFB1M     | 8130438 | 0.336894 | 6.632352 | 3.258204 | 0.004295 | 0.255766 | -1.87522 | KDM8       | 8000411 | -0.6117  | 5.912755 | -3.415025 | 0.00303  | 0.180593 | -1.59227 | HPF        | 7947490 | -0.5006  | 5.436444 | -3.07795 | 0.006465 | 0.386464 | -2.22106 |
| CDH26     | 8063761 | -0.3238  | 3.701782 | -3.2657  | 0.004338 | 0.255766 | -1.88372 | MNV        | 8128695 | -0.29518 | 3.237516 | -3.41485  | 0.003032 | 0.180593 | -1.59263 | UPF3A      | 7970370 | -0.33841 | 6.32411  | -3.0705  | 0.0065   | 0.387101 | -2.22538 |
| #NV       | 7896348 | -0.33099 | 3.716279 | -3.2535  | 0.00434  | 0.255766 | -1.88403 | MNV        | 8163000 | -0.75772 | 6.715748 | -3.41368  | 0.00304  | 0.180593 | -1.59492 | EEF1B2     | 8047780 | -0.81359 | 6.321314 | -3.07017 | 0.006505 | 0.387101 | -2.22597 |
| SPTLC3    | 8095907 | 0.521905 | 8.78188  | 3.252781 | 0.004347 | 0.255766 | -1.88538 | APIP       | 7947490 | 0.555981 | 4.534644 | 3.41292   | 0.003045 | 0.180593 | -1.59643 | SCARN6     | 8049299 | -0.58049 | 7.170644 | -3.06796 | 0.00651  | 0.387101 | -2.22609 |
| FBX08     | 7912955 | 0.288246 | 8.017035 | 3.2517   | 0.004357 | 0.255766 | -1.8874  | MNV        | 7895405 | 0.316077 | 8.514917 | 3.41283   | 0.003045 | 0.180593 | -1.59659 | CNGA3      | 8043782 | -0.24662 | 2.794546 | -3.06622 | 0.006561 | 0.388499 | -2.23294 |
| BTRC      | 8097958 | 0.212251 | 6.812881 | 3.25074  | 0.004371 | 0.255766 | -1.89007 | PLP        | 7974035 | -0.17413 | 6.509745 | -3.41246  | 0.003048 | 0.180593 | -1.59732 | FOXO4L2    | 8161533 | -0.24386 | 4.158332 | -3.06615 | 0.006562 | 0.388499 | -2.23306 |
| MXRAS     | 8117112 | 0.528214 | 6.023649 | 3.250047 | 0.004373 | 0.255766 | -1.8905  | PIGN       | 8023605 | -0.26786 | 5.627029 | -3.41242  | 0.003048 | 0.180593 | -1.5974  | ZNF232     | 8011817 | 0.222841 | 4.25405  | 3.065672 | 0.006569 | 0.388499 | -2.23391 |
| CREB3     | 8155096 | 0.384289 | 6.888816 | 3.248185 | 0.004392 | 0.255766 | -1.89398 | MNV        | 8036363 | 0.318064 | 7.857374 | 3.411457  | 0.003055 | 0.180659 | -1.59929 | RNU2-1 /// | 8019709 | -0.34615 | 11.7336  | -3.06439 | 0.006588 | 0.388499 | -2.23417 |
| #NV       | 7892955 | -0.40084 | 8.276285 | -3.24694 | 0.004404 | 0.255766 | -1.89632 | SCAMP1 /// | 8103479 | -0.324   | 7.149899 | -3.40887  | 0.003072 | 0.181166 | -1.60439 | MNV        | 7916775 | 0.561724 | 5.60255  | 3.06344  | 0.006601 | 0.388499 | -2.23785 |
| NKX1      | 7995525 | -0.34926 | 5.959049 | -3.24599 | 0.004413 | 0.255766 | -1.89859 | MNV        | 8106774 | -0.34022 | 5.439529 | -3.40861  | 0.003074 | 0.181166 | -1.6049  | C16orf80   | 8001658 | 0.29367  | 6.00034  | 3.062366 | 0.006604 | 0.388499 | -2.23819 |
| ZNF32     | 7933116 | 0.313965 | 5.886941 | 3.24477  | 0.004417 | 0.255766 | -1.89879 | MNV        | 7896481 | -0.4258  | 8.456687 | -3.40632  | 0.00309  | 0.181543 | -1.60941 | TMEM17     | 8052585 | 0.134    |          |          |          |          |          |

|                 |         |          |          |           |          |          |          |            |         |          |          |          |            |          |          |           |         |          |          |           |          |          |          |
|-----------------|---------|----------|----------|-----------|----------|----------|----------|------------|---------|----------|----------|----------|------------|----------|----------|-----------|---------|----------|----------|-----------|----------|----------|----------|
| MAPK13          | 8119016 | -0.33202 | 4.959889 | -1.51241  | 0.005428 | 0.275304 | -0.07282 | TTTT7 ///  | 8177048 | -0.26214 | 3.014861 | -3.31213 | 0.003811   | 0.192201 | -1.79427 | 8789394   | -0.967  | 5.540027 | -2.98495 | 0.007839  | 0.396569 | -2.37597 |          |
| ATP6VD0         | 8002401 | 0.431088 | 8.410249 | 3.151593  | 0.005437 | 0.275304 | -0.07434 | CEBP       | 7969341 | 0.27667  | 6.694736 | 3.10776  | 0.003822   | 0.192201 | -1.79691 | LYPD4     | 8075601 | -0.21387 | 2.967338 | -2.98489  | 0.007874 | 0.396569 | -2.37670 |
| GASS /// S      | 7922402 | -0.41481 | 7.122621 | -1.515628 | 0.005441 | 0.275304 | -0.07495 | RNS129     | 8027866 | -0.49865 | 5.825695 | -3.1009  | 0.003828   | 0.192201 | -1.79825 | SYCP3     | 7936800 | -0.29687 | 3.872242 | -2.98499  | 0.007857 | 0.396569 | -2.37707 |
| SNORD11E        | 7919988 | -0.46689 | 6.320563 | -1.51005  | 0.005456 | 0.275304 | -0.07721 | TOM11      | 8008547 | -0.30764 | 7.656874 | -3.30919 | 0.003836   | 0.192201 | -1.80002 | RNUGATAC  | 8112176 | -0.5494  | 5.958171 | -2.9827   | 0.007878 | 0.396569 | -2.37893 |
| #NV             | 7896440 | 0.551463 | 3.873601 | 3.149952  | 0.005457 | 0.275304 | -0.07739 | STK3       | 8151967 | -0.28514 | 5.705977 | -3.3064  | 0.00384    | 0.192201 | -1.80111 | CETN3     | 8133090 | 0.395746 | 4.171742 | 2.982314  | 0.007885 | 0.396569 | -2.38006 |
| #NV             | 8094732 | -0.34176 | 7.896626 | -1.4846   | 0.005475 | 0.275749 | -0.08016 | #NV        | 7895044 | -0.78013 | 6.017428 | -3.3081  | 0.003841   | 0.192201 | -1.80135 | #NV       | 7972932 | -0.78459 | 3.855519 | -2.98134  | 0.007901 | 0.396569 | -2.3823  |
| KPN2            | 8077974 | 0.64791  | 6.277191 | 3.145526  | 0.005511 | 0.275749 | -0.08063 | TRD3       | 7969341 | -0.2301  | 6.45877  | -3.3081  | 0.003854   | 0.192201 | -1.80435 | SNORA31   | 7971386 | -0.48544 | 6.660009 | -2.98073  | 0.007912 | 0.396569 | -2.38389 |
| KAT3            | 8078673 | 0.30854  | 5.509697 | 3.144556  | 0.005522 | 0.275749 | -0.08143 | PCV1       | 7895044 | -0.23484 | 6.161153 | -3.3082  | 0.003857   | 0.192201 | -1.80477 | SNORD32   | 813746  | -0.3198  | 5.137442 | -2.98225  | 0.007938 | 0.396569 | -2.38598 |
| CCDC96          | 8099242 | -0.21715 | 3.117424 | -1.44444  | 0.005524 | 0.275749 | -0.08765 | YMHAA      | 8027577 | -0.30582 | 7.119733 | -3.30591 | 0.003868   | 0.192201 | -1.80746 | SLCO3A    | 8041257 | 0.297067 | 8.02071  | 2.978469  | 0.007951 | 0.396569 | -2.38734 |
| TMD02           | 8095957 | 0.305155 | 11.09629 | 3.141138  | 0.005527 | 0.275749 | -0.08721 | BTFP310    | 8072372 | -0.24764 | 3.906348 | -3.30521 | 0.00387    | 0.192201 | -1.80781 | LYRM2 /// | 7999752 | 0.404306 | 8.176881 | 2.977946  | 0.00796  | 0.396569 | -2.38826 |
| #NV             | 7894337 | 0.759623 | 4.607823 | 3.142586  | 0.005546 | 0.275749 | -0.09111 | #NV        | 7894299 | -0.52572 | 5.656218 | -3.30507 | 0.003871   | 0.192201 | -1.80809 | ADAMTSL5  | 8038229 | -0.257   | 6.81297  | -2.97781  | 0.007963 | 0.396569 | -2.3885  |
| USP5            | 7953483 | 0.269403 | 6.676857 | 3.142586  | 0.005555 | 0.275749 | -0.09171 | SNORD3A    | 8005547 | 1.206449 | 4.863336 | -3.30459 | 0.003875   | 0.192201 | -1.80909 | SNORD62A  | 8188262 | -0.27956 | 4.815515 | -2.97751  | 0.007968 | 0.396569 | -2.38920 |
| CTSD            | 8096566 | 0.24228  | 10.81515 | 3.140609  | 0.005571 | 0.275749 | -0.09478 | SNORD3A    | 8003553 | 1.206449 | 4.863336 | -3.30459 | 0.003875   | 0.192201 | -1.80909 | SNORD62A  | 8188262 | -0.27956 | 4.815515 | -2.97751  | 0.007968 | 0.396569 | -2.38902 |
| #NV             | 8186310 | 0.292511 | 7.299724 | 3.140489  | 0.005572 | 0.275749 | -0.09785 | SNORD3A    | 8013325 | 1.206449 | 4.863336 | -3.30459 | 0.003875   | 0.192201 | -1.80909 | AMZ2      | 8000434 | 0.224204 | 7.669503 | 2.974262  | 0.008056 | 0.39951  | -2.39788 |
| SNX29 ///       | 7994576 | -0.4117  | 7.681582 | -1.3939   | 0.005586 | 0.275749 | -0.09705 | SNORD3A    | 8013325 | 1.206449 | 4.863336 | -3.30459 | 0.003875   | 0.192201 | -1.80909 | AMZ2      | 8000434 | 0.224204 | 7.669503 | 2.974262  | 0.008056 | 0.39951  | -2.39788 |
| #NV             | 7894778 | 0.680617 | 3.343797 | 3.138772  | 0.005593 | 0.275749 | -0.09820 | SNORD3A    | 8013325 | 1.206449 | 4.863336 | -3.30459 | 0.003875   | 0.192201 | -1.80909 | THAP4     | 8089274 | -0.18563 | 6.873961 | -2.97139  | 0.008075 | 0.39951  | -2.39975 |
| #NV             | 7895669 | -0.50721 | 6.710496 | -1.3826   | 0.005599 | 0.275749 | -0.09915 | F138       | 7923073 | -0.30367 | 9.891021 | -3.30412 | 0.003879   | 0.192201 | -1.80995 | THAP4     | 8072750 | -0.18563 | 6.873961 | -2.97139  | 0.008075 | 0.39951  | -2.39975 |
| MOB1B           | 8095566 | 0.299663 | 6.127361 | 3.138034  | 0.005602 | 0.275749 | -0.09957 | LOC1062    | 8040073 | -0.50543 | 3.488877 | -3.30149 | 0.003902   | 0.193037 | -1.81509 | PP1R14C   | 8122734 | -0.15753 | 3.625604 | -2.96838  | 0.008028 | 0.40034  | -2.40073 |
| #NV             | 8035792 | -0.68565 | 5.550849 | -1.3801   | 0.005603 | 0.275749 | -0.09961 | FAM787A    | 7895756 | -0.28066 | 3.501088 | -3.29954 | 0.003919   | 0.193199 | -1.81891 | #NV       | 8048116 | -0.32467 | 6.127656 | -2.96778  | 0.008139 | 0.40034  | -2.40608 |
| #NV             | 7973734 | 0.27467  | 5.529044 | 3.138013  | 0.005603 | 0.275749 | -0.09961 | #NV        | 8159846 | -0.28059 | 2.787804 | -3.29947 | 0.003919   | 0.193199 | -1.81905 | C2orf49   | 8044127 | 0.308841 | 6.321078 | 2.967412  | 0.008145 | 0.40034  | -2.40673 |
| #NV             | 7955030 | 0.834372 | 4.010266 | 3.136856  | 0.005617 | 0.275749 | -0.10176 | CYF4F2     | 8026424 | 0.709022 | 6.576951 | 3.299111 | 0.003922   | 0.193199 | -1.81975 | #NV       | 7963931 | -0.4831  | 4.190109 | -2.9678   | 0.008163 | 0.40034  | -2.40855 |
| #NV             | 7959597 | 0.834372 | 4.010266 | 3.136856  | 0.005617 | 0.275749 | -0.10176 | #NV        | 7894432 | -0.55714 | 6.874345 | -3.29709 | 0.00394    | 0.193396 | -1.8237  | GSTM2 /// | 7919269 | -0.43543 | 12.93262 | -2.96637  | 0.008164 | 0.40034  | -2.40855 |
| SACM1L          | 8079346 | -0.21583 | 7.940598 | 3.136717  | 0.005619 | 0.275749 | -0.10276 | RNUSA-4P   | 7970945 | -0.19098 | 2.518683 | 2.96344  | 0.00394    | 0.193396 | -1.82516 | GSTM2 /// | 7919269 | -0.43543 | 12.93262 | -2.96637  | 0.008164 | 0.40034  | -2.40855 |
| ZBT87A          | 8032755 | -0.29242 | 6.531311 | -1.33635  | 0.005623 | 0.275749 | -0.1027  | BACH1 ///  | 8068105 | -0.27356 | 6.657053 | -3.29605 | 0.003949   | 0.193396 | -1.82574 | VP35      | 8001149 | 0.287651 | 7.51082  | 2.965194  | 0.008185 | 0.400283 | -2.41061 |
| PPM1E           | 7942503 | 0.274097 | 6.80072  | 3.13467   | 0.005644 | 0.276364 | -0.10582 | NUDT4 ///  | 7917913 | -0.52716 | 5.905572 | -3.29429 | 0.003965   | 0.193396 | -1.82919 | SVIP      | 7947147 | 0.05809  | 5.797748 | 2.963896  | 0.008206 | 0.40123  | -2.41273 |
| ESPR            | 7975876 | -0.22811 | 3.199719 | -1.3363   | 0.005657 | 0.276593 | -0.10776 | GJA9 /// G | 7915178 | 0.261234 | 2.556895 | 2.94156  | 0.003966   | 0.193396 | -1.82944 | #NV       | 7926539 | -0.22603 | 3.294933 | -2.96215  | 0.008239 | 0.401551 | -2.41595 |
| GCRL            | 8049670 | 0.356433 | 5.880173 | 3.132354  | 0.005673 | 0.276597 | -0.11013 | TSPAN3     | 7996020 | 0.432382 | 7.828036 | 3.29852  | 0.003969   | 0.193396 | -1.83008 | ORAN2     | 8188394 | -0.27651 | 2.604288 | -2.96126  | 0.008255 | 0.401551 | -2.41791 |
| LOC10050        | 7981992 | -0.5794  | 4.944669 | -1.3329   | 0.005674 | 0.276597 | -0.11025 | #NV        | 7990564 | -0.77942 | 5.472436 | -3.2921  | 0.003975   | 0.193396 | -1.83151 | HIST1HE   | 8117337 | 0.310653 | 11.04137 | 2.961182  | 0.008257 | 0.401551 | -2.41764 |
| BDP1            | 8013331 | 0.235689 | 6.33793  | 3.139201  | 0.0057   | 0.277468 | -0.11414 | IPO5       | 7969675 | -0.27654 | 8.440543 | -3.2942  | 0.003981   | 0.193396 | -1.83284 | MBO1      | 8023273 | -0.18068 | 6.89109  | -2.96096  | 0.008261 | 0.401551 | -2.41803 |
| ZNF3            | 8071260 | -0.22662 | 6.854416 | -1.1254   | 0.00576  | 0.27898  | -0.12306 | LSG1       | 8029905 | 0.251318 | 7.311427 | 3.29147  | 0.003985   | 0.193396 | -1.83376 | MEXD3     | 8032265 | -0.17476 | 6.133002 | -2.96017  | 0.008275 | 0.401653 | -2.41981 |
| BCAT1           | 7907619 | -0.33268 | 3.18897  | -1.24258  | 0.005772 | 0.27898  | -0.12468 | IRF7       | 7945462 | -0.42953 | 5.704007 | -3.29127 | 0.003992   | 0.193396 | -1.83519 | CDKN2B    | 8004763 | -0.19687 | 3.716266 | -2.95936  | 0.008289 | 0.401776 | -2.42042 |
| #NV             | 7892176 | -0.37129 | 6.528489 | -1.2378   | 0.005781 | 0.27898  | -0.12576 | SYT12      | 7932774 | -0.37465 | 8.293788 | -3.29127 | 0.004004   | 0.193396 | -1.83714 | #NV       | 8048116 | -0.32467 | 6.127656 | -2.96778  | 0.008139 | 0.40034  | -2.40608 |
| #NV             | 7896445 | -0.42671 | 7.320236 | -1.23204  | 0.00579  | 0.27898  | -0.12744 | CNBE8      | 7962150 | 0.3156   | 7.242641 | -3.28942 | 0.004008   | 0.193396 | -1.8387  | DDF2      | 8158249 | -0.23717 | 6.52066  | -2.9557   | 0.008356 | 0.402348 | -2.42723 |
| #NV             | 8086125 | -0.23579 | 6.96834  | -1.23245  | 0.005798 | 0.27898  | -0.12854 | #NV        | 8092922 | -0.59839 | 3.02086  | -3.2881  | 0.004019   | 0.193396 | -1.84128 | #NV       | 7895153 | 0.495439 | 6.77698  | 2.955155  | 0.008366 | 0.402348 | -2.42819 |
| NR3C2           | 8103904 | -0.2941  | 6.805903 | -1.23243  | 0.005798 | 0.27898  | -0.12858 | INPP4A     | 8043791 | 0.166726 | 6.627767 | 2.87813  | 0.004022   | 0.193396 | -1.84185 | KIF11     | 7929258 | 0.268713 | 3.107165 | 2.95837   | 0.008372 | 0.402348 | -2.42875 |
| RN193           | 7921840 | -0.29433 | 9.534539 | -1.1244   | 0.005811 | 0.27898  | -0.13045 | #NV        | 7892982 | 0.267736 | 4.009746 | 2.86931  | 0.004003   | 0.193396 | -1.84358 | FAM171A2  | 8016033 | -0.37037 | 4.551185 | -2.95439  | 0.008387 | 0.402348 | -2.43023 |
| LGSN            | 8122780 | -0.50799 | 5.249966 | -1.2141   | 0.005811 | 0.27898  | -0.13047 | #NV        | 7892555 | -0.3142  | 6.879703 | -3.28599 | 0.004038   | 0.193396 | -1.84542 | ITGA1     | 8105229 | 0.226802 | 7.75854  | 2.953458  | 0.008397 | 0.402348 | -2.43116 |
| PDE7B           | 8173322 | -0.44658 | 6.721057 | -1.2089   | 0.005818 | 0.27898  | -0.13144 | MIR30B     | 8153065 | -0.36636 | 6.998838 | -3.2853  | 0.00404    | 0.193396 | -1.84572 | #NV       | 7999430 | 0.346802 | 3.886793 | 2.952544  | 0.008414 | 0.402348 | -2.43276 |
| LOC14688        | 8016761 | -0.24968 | 6.432811 | -1.2085   | 0.005818 | 0.27898  | -0.13151 | KPNA2      | 8009417 | 0.694218 | 6.519137 | 3.28535  | 0.004044   | 0.193396 | -1.8466  | #NV       | 8013013 | 0.326229 | 4.264162 | -2.952109 | 0.008422 | 0.402348 | -2.43352 |
| SNX29P1 / GAPDH | 7993825 | -0.42001 | 7.565819 | -1.2041   | 0.005824 | 0.27898  | -0.13234 | SEMA5A     | 8110932 | -0.35431 | 7.538587 | -3.28449 | 0.004052   | 0.193396 | -1.84835 | #NV       | 8078153 | 0.506342 | 2.978153 | 2.951621  | 0.008431 | 0.402348 | -2.43438 |
| #NV             | 7953385 | 0.300356 | 11.78162 | 3.119533  | 0.005835 | 0.27898  | -0.13396 | ZC3H6      | 8044450 | -0.4441  | 6.883932 | -3.2842  | 0.004061   | 0.193396 | -1.85043 | #NV       | 8169000 | 0.391648 | 4.851486 | 2.949511  | 0.00847  | 0.402348 | -2.43807 |
| #NV             | 8122314 | -0.3508  | 5.540845 | -1.31918  | 0.00584  | 0.27898  | -0.13462 | FGD4       | 8094229 | -0.40225 | 8.201001 | -3.2827  | 0.004068   | 0.193396 | -1.85185 | TPGS1     | 8023948 | -0.22797 | 4.97369  | -2.94716  | 0.008513 | 0.402348 | -2.44219 |
| #NV             | 7895994 | -0.37485 | 6.05455  | -1.31789  | 0.005857 | 0.27898  | -0.13702 | LOC100478  | 8067932 | -0.34617 | 6.448821 | -3.28233 | 0.004071</ |          |          |           |         |          |          |           |          |          |          |

|          |          |          |          |           |          |          |           |            |          |           |          |          |          |          |          |           |         |          |          |           |          |          |          |
|----------|----------|----------|----------|-----------|----------|----------|-----------|------------|----------|-----------|----------|----------|----------|----------|----------|-----------|---------|----------|----------|-----------|----------|----------|----------|
| BICAP31  | 8175835  | 0.204295 | 8.073378 | 3.044408  | 0.066883 | 0.290836 | -2.273116 | #NV        | 8068214  | -0.30732  | 2.925711 | -3.20831 | 0.004797 | 0.20231  | -1.99697 | KBTBD11   | 8144317 | -0.35643 | 4.619788 | -2.88467  | 0.009752 | 0.410206 | -2.5512  |
| TES      | 8135576  | 0.37804  | 6.60296  | 3.043671  | 0.066894 | 0.290938 | -2.27452  | #NV        | 8013013  | -0.3545   | 4.264162 | -3.20797 | 0.004801 | 0.20231  | -1.99763 | HERCS     | 8096361 | 0.534549 | 5.276242 | 2.884457  | 0.009756 | 0.410206 | -2.55157 |
| LAR036   | 7990080  | 0.274289 | 8.537953 | 3.043564  | 0.066926 | 0.291579 | -2.27842  | NR3C2      | 8103904  | -0.3021   | 6.805903 | -3.20375 | 0.004807 | 0.20231  | -1.99884 | SLC30A3   | 8051050 | -0.24671 | 4.002094 | -2.88409  | 0.009764 | 0.410206 | -2.55221 |
| DSCR3    | 8072629  | 0.315049 | 8.282628 | 3.041236  | 0.066931 | 0.291579 | -2.27902  | CCBL2      | 7917482  | -0.34072  | 7.445044 | -3.20688 | 0.004812 | 0.20231  | -1.99976 | SLC35F5   | 8054771 | 0.190972 | 8.512474 | 2.883598  | 0.009774 | 0.410206 | -2.55307 |
| #NV      | 7893939  | -0.47007 | 7.612077 | -3.00126  | 0.066935 | 0.291579 | -2.27958  | SCARNAS    | 8160295  | 0.54645   | 4.997418 | 3.206608 | 0.004821 | 0.20231  | -2.00133 | #NV       | 7892771 | 0.328349 | 8.293798 | 2.883537  | 0.009776 | 0.410206 | -2.55377 |
| TAF4B    | 8032007  | -0.29705 | 7.252118 | -3.0397   | 0.066954 | 0.291666 | -2.28186  | EXL        | 8145624  | 0.250235  | 6.528482 | 3.20514  | 0.004831 | 0.202578 | -2.00314 | GLCC1     | 8131496 | 0.225889 | 7.042415 | 2.883248  | 0.009782 | 0.410206 | -2.55388 |
| NR0782   | -0.28627 | 4.629469 | -3.0374  | 0.066955  | 0.291666 | -2.28195 | CAT       | 8117132    | -0.28035 | 9.497634  | -3.2041  | 0.004842 | 0.202787 | -2.00516 | TNDC15   | 8108166   | 0.19576 | 6.750128 | 2.88247  | 0.009798  | 0.410382 | -2.55503 |          |
| TSK3     | 785790   | 0.30142  | 8.159662 | 3.0374    | 0.066989 | 0.292634 | -2.2861   | ABCN11     | 8095388  | -0.351    | 9.053693 | -3.20281 | 0.004856 | 0.202787 | -2.00767 | #NV       | 8014749 | -0.24288 | 6.251268 | -2.88122  | 0.009825 | 0.410391 | -2.5572  |
| CRED2    | 8079349  | 0.293487 | 8.114595 | 3.036989  | 0.066996 | 0.292634 | -2.28686  | TMT1C      | 7962058  | -0.67904  | 6.576305 | -3.2013  | 0.004872 | 0.203537 | -2.01061 | TSMXN /// | 7910550 | 0.309312 | 8.327712 | 2.880871  | 0.009832 | 0.410391 | -2.55781 |
| SMARCA1  | 8048175  | 0.18982  | 6.746521 | 3.03565   | 0.07013  | 0.29276  | -2.28892  | MFSDD2A    | 7900365  | 1.198806  | 8.37938  | 3.198082 | 0.004907 | 0.204733 | -2.01687 | ZP3       | 8133728 | 0.307109 | 6.36218  | 2.87947   | 0.009862 | 0.410391 | -2.56025 |
| LNOC047E | 8067932  | -0.32016 | 6.448521 | -3.03565  | 0.07016  | 0.29276  | -2.28934  | #NV        | 7895362  | -0.53423  | 7.156963 | -3.19664 | 0.004922 | 0.205129 | -2.01967 | CLECIA    | 7961111 | 0.290238 | 3.166267 | 2.879246  | 0.009867 | 0.410391 | -2.56064 |
| PNC1     | 8042381  | 0.223837 | 4.968889 | 3.034769  | 0.07003  | 0.292811 | -2.29097  | #NV        | 7895714  | -0.29146  | 10.34487 | -3.1964  | 0.004929 | 0.205129 | -2.02092 | MRF533    | 8143433 | 0.345244 | 5.294478 | 2.878447  | 0.009876 | 0.410391 | -2.56133 |
| RHG      | 7906163  | -1.15708 | 6.503403 | -3.03443  | 0.070035 | 0.292811 | -2.2916   | ALG13      | 8169419  | -0.36069  | 6.002038 | -3.19183 | 0.004975 | 0.206807 | -2.02904 | OR3A1     | 8011337 | 0.23604  | 2.824096 | 2.877786  | 0.009898 | 0.410391 | -2.56317 |
| FAM129B  | 8164217  | 0.370197 | 8.590549 | 3.032836  | 0.07006  | 0.293466 | -2.29354  | ZF585A     | 8036373  | -0.35031  | 9.498711 | -3.19125 | 0.004981 | 0.206811 | -2.03015 | SLC10A3   | 8176109 | -0.28227 | 10.22455 | -2.87759  | 0.009903 | 0.410391 | -2.56352 |
| MIR205   | 7909422  | -0.32424 | 3.151959 | -3.03218  | 0.07007  | 0.293499 | -2.29574  | MYO18      | 8047127  | -0.25503  | 10.09777 | -3.18944 | 0.005001 | 0.207383 | -2.03368 | MTTP      | 8096580 | 0.225257 | 10.22455 | -2.876544 | 0.009925 | 0.410391 | -2.56533 |
| PSMD10   | 8174379  | 0.35652  | 7.543031 | 3.031648  | 0.070078 | 0.293499 | -2.29673  | CD6C       | 8007071  | 0.685365  | 3.299927 | 3.188427 | 0.005013 | 0.207421 | -2.03565 | ZNF219    | 7977646 | -0.22074 | 5.109145 | -2.876544 | 0.009926 | 0.410391 | -2.56538 |
| MEI52    | 7987385  | -0.33102 | 6.327301 | -3.03041  | 0.070097 | 0.293733 | -2.299    | #NV        | 7902474  | -0.45584  | 4.780233 | -3.18823 | 0.005015 | 0.207421 | -2.03603 | WASL      | 8142671 | 0.174948 | 8.296281 | 2.87573   | 0.009943 | 0.410391 | -2.56673 |
| COPE54   | 8096908  | 0.247112 | 6.350656 | 3.030147  | 0.070101 | 0.293733 | -2.2995   | #NV        | 7996403  | -0.44583  | 6.254087 | -3.18716 | 0.005027 | 0.207656 | -2.03811 | #NV       | 7896458 | -0.27047 | 11.14697 | -2.87531  | 0.009947 | 0.410391 | -2.56715 |
| INGS     | 8049956  | -0.29291 | 5.727603 | -3.02871  | 0.070124 | 0.294297 | -2.30216  | RAMD564    | 7971246  | -0.22812  | 8.945494 | -3.18644 | 0.005038 | 0.207765 | -2.04009 | GSN       | 8178442 | -0.22292 | 4.067193 | -2.87498  | 0.009959 | 0.410391 | -2.56806 |
| #NV      | 8140127  | -0.2568  | 2.487895 | -3.02684  | 0.07016  | 0.294211 | -2.30641  | HEATR5B    | 8051464  | -0.20625  | 7.868867 | -3.18558 | 0.005042 | 0.207765 | -2.04076 | ORS2E2    | 7946019 | -0.20306 | 2.717155 | -2.87495  | 0.009959 | 0.410391 | -2.5681  |
| CALR     | 8021606  | 0.292623 | 10.69075 | 3.025509  | 0.070174 | 0.295631 | -2.30805  | #NV        | 7896499  | 0.736532  | 5.242094 | 3.184662 | 0.005052 | 0.207765 | -2.04257 | PPPR2     | 8092959 | 0.251327 | 7.099488 | 2.874406  | 0.009971 | 0.410391 | -2.56905 |
| #NV      | 7894464  | -0.46711 | 7.283079 | -3.02412  | 0.070196 | 0.296165 | -2.31062  | CAMK2D     | 8102415  | -0.27909  | 7.721468 | -3.18435 | 0.005058 | 0.207765 | -2.04357 | #NV       | 7977646 | -0.22074 | 5.109145 | -2.876544 | 0.009926 | 0.410391 | -2.56538 |
| KIF5B    | 7932911  | 0.234021 | 8.177614 | 3.020818  | 0.070248 | 0.297209 | -2.31671  | #NV        | 8022247  | 0.232506  | 5.240203 | 3.184123 | 0.00506  | 0.207765 | -2.04401 | #NV       | 7977646 | -0.22074 | 5.109145 | -2.876544 | 0.009926 | 0.410391 | -2.56538 |
| SNORD11E | 7982000  | -0.5458  | 6.805184 | -3.01987  | 0.070263 | 0.297209 | -2.31846  | PP1R14B    | 7949060  | 0.223871  | 7.511319 | 3.183355 | 0.005069 | 0.207861 | -2.0455  | #NV       | 7977646 | -0.22074 | 5.109145 | -2.876544 | 0.009926 | 0.410391 | -2.56538 |
| PC       | 7949719  | -0.30421 | 8.649778 | -3.01923  | 0.070273 | 0.297209 | -2.31963  | FLJ13197   | 8099817  | -0.49156  | 5.681908 | -3.18276 | 0.005076 | 0.207879 | -2.04666 | #NV       | 7977646 | -0.22074 | 5.109145 | -2.876544 | 0.009926 | 0.410391 | -2.56538 |
| #NV      | 8101285  | -0.24146 | 4.055192 | -3.01921  | 0.070274 | 0.297209 | -2.31968  | C8orf46    | 8146703  | -0.70543  | 6.663361 | -3.18151 | 0.00509  | 0.207992 | -2.04908 | #NV       | 7977646 | -0.22074 | 5.109145 | -2.876544 | 0.009926 | 0.410391 | -2.56538 |
| OTOP2    | 8009705  | -0.27697 | 3.647427 | -3.01905  | 0.070276 | 0.297209 | -2.31996  | PIK3R2     | 8026954  | 0.404123  | 6.327187 | 3.181402 | 0.005091 | 0.207992 | -2.0493  | #NV       | 7977646 | -0.22074 | 5.109145 | -2.876544 | 0.009926 | 0.410391 | -2.56538 |
| #NV      | 7894725  | 0.249149 | 10.28339 | 3.018591  | 0.070283 | 0.297209 | -2.32081  | PDD2A      | 8175860  | 0.322229  | 3.529775 | 3.179582 | 0.005111 | 0.20833  | -2.05283 | #NV       | 7977646 | -0.22074 | 5.109145 | -2.876544 | 0.009926 | 0.410391 | -2.56538 |
| #NV      | 7893258  | 0.748988 | 7.158325 | 3.018579  | 0.070284 | 0.297209 | -2.32084  | #NV        | 7988410  | -0.52592  | 4.037165 | -3.17956 | 0.005112 | 0.20833  | -2.05288 | #NV       | 7977646 | -0.22074 | 5.109145 | -2.876544 | 0.009926 | 0.410391 | -2.56538 |
| PRR25    | 7992121  | 0.24733  | 3.458513 | 3.017264  | 0.070305 | 0.297701 | -2.32326  | BBS2       | 8001507  | -0.32259  | 6.616028 | -3.17819 | 0.005127 | 0.208706 | -2.05555 | #NV       | 7977646 | -0.22074 | 5.109145 | -2.876544 | 0.009926 | 0.410391 | -2.56538 |
| SARDH    | 8164940  | -0.30519 | 8.888085 | -3.0163   | 0.07032  | 0.29783  | -2.32504  | CE53       | 7996361  | 0.363123  | 8.286936 | 3.174822 | 0.005165 | 0.209826 | -2.06208 | #NV       | 7977646 | -0.22074 | 5.109145 | -2.876544 | 0.009926 | 0.410391 | -2.56538 |
| #NV      | 8157144  | -0.30149 | 3.313566 | -3.015912 | 0.070384 | 0.298276 | -2.32735  | POU1F11L1E | 7971177  | -0.359833 | 8.855983 | -3.17463 | 0.00517  | 0.210322 | -2.06288 | #NV       | 7977646 | -0.22074 | 5.109145 | -2.876544 | 0.009926 | 0.410391 | -2.56538 |
| BLMH     | 8101408  | -0.35712 | 11.23542 | -3.01474  | 0.070345 | 0.29783  | -2.32792  | BAC1       | 7961829  | 0.337959  | 3.18997  | 3.174105 | 0.005174 | 0.209826 | -2.06347 | #NV       | 7977646 | -0.22074 | 5.109145 | -2.876544 | 0.009926 | 0.410391 | -2.56538 |
| SNORD11S | 7982054  | -0.3523  | 2.944708 | -3.01415  | 0.070355 | 0.29783  | -2.329    | RM14       | 7941707  | 0.243256  | 6.986593 | 3.173337 | 0.005182 | 0.209927 | -2.06496 | #NV       | 7977646 | -0.22074 | 5.109145 | -2.876544 | 0.009926 | 0.410391 | -2.56538 |
| MAG1I    | 8088602  | -0.22614 | 8.323196 | -3.01346  | 0.070366 | 0.29783  | -2.33027  | MFN1       | 8084045  | -0.21952  | 6.8485   | -3.17038 | 0.005216 | 0.211048 | -2.07071 | #NV       | 7977646 | -0.22074 | 5.109145 | -2.876544 | 0.009926 | 0.410391 | -2.56538 |
| #NV      | 7937508  | 0.525188 | 9.140524 | 3.013381  | 0.070367 | 0.29783  | -2.33042  | #NV        | 7895908  | 1.001205  | 5.309846 | 3.168992 | 0.005232 | 0.211436 | -2.0734  | #NV       | 7977646 | -0.22074 | 5.109145 | -2.876544 | 0.009926 | 0.410391 | -2.56538 |
| TMEM74   | 8152335  | 0.369259 | 3.71563  | 3.013168  | 0.07037  | 0.29783  | -2.33081  | UPF1       | 8027074  | 0.207289  | 7.746149 | 3.168388 | 0.005239 | 0.211462 | -2.07457 | #NV       | 7977646 | -0.22074 | 5.109145 | -2.876544 | 0.009926 | 0.410391 | -2.56538 |
| #NV      | 7961602  | -0.27919 | 4.11457  | -3.01173  | 0.070394 | 0.29812  | -2.33346  | C4orf36 // | 8101616  | -0.25212  | 3.257811 | -3.16779 | 0.005246 | 0.211483 | -2.07573 | #NV       | 7977646 | -0.22074 | 5.109145 | -2.876544 | 0.009926 | 0.410391 | -2.56538 |
| ZNF804A  | 8046815  | 0.254672 | 2.899832 | 3.011588  | 0.070396 | 0.29812  | -2.33372  | EGRF       | 8132860  | -0.27413  | 8.705534 | -3.16716 | 0.005254 | 0.211521 | -2.07691 | #NV       | 7977646 | -0.22074 | 5.109145 | -2.876544 | 0.009926 | 0.410391 | -2.56538 |
| ABC2     | 8101675  | -0.43906 | 7.029523 | -3.01079  | 0.070409 | 0.29812  | -2.33519  | MYADM1     | 8051422  | 0.225357  | 3.676816 | 3.165587 | 0.005272 | 0.212003 | -2.08005 | #NV       | 7977646 | -0.22074 | 5.109145 | -2.876544 | 0.009926 | 0.410391 | -2.56538 |
| #NV      | 8180286  | 0.30292  | 6.827515 | 3.010299  | 0.070417 | 0.29812  | -2.3361   | MCE        | 8052934  | -0.25874  | 6.021363 | -3.16088 | 0.005327 | 0.212972 | -2.08915 | #NV       | 7977646 | -0.22074 | 5.109145 | -2.876544 | 0.009926 | 0.410391 | -2.56538 |
| #NV      | 8154979  | -0.38114 | 3.970477 | -3.00996  | 0.070422 | 0.29812  | -2.33673  | ZEB1       | 7929619  | -0.30634  | 7.087143 | -3.16073 | 0.005329 | 0.212972 | -2.08944 | #NV       | 7977646 | -0.22074 | 5.109145 | -2.876544 | 0.009926 | 0.410391 | -2.56538 |
| #NV      | 8168627  | -0.38364 | 4.941866 | -3.00875  | 0.070442 | 0.298268 | -2.34296  | NOTDL      | 8101228  | -0.28569  | 6.375201 | -3.15983 |          |          |          |           |         |          |          |           |          |          |          |

|           |         |          |          |           |          |          |          |           |         |          |          |           |          |          |          |
|-----------|---------|----------|----------|-----------|----------|----------|----------|-----------|---------|----------|----------|-----------|----------|----------|----------|
| VIEWF3    | 8027213 | -0.2684  | 5.755457 | -2.95433  | 0.008381 | 0.302059 | -2.43898 | ZCCHC8    | 7967287 | -0.25138 | 6.962385 | -3.10611  | 0.00601  | 0.216536 | -2.19519 |
|           | 7895362 | -0.49364 | 7.156663 | -2.95373  | 0.008392 | 0.302059 | -2.44007 | BAZ28     | 8056060 | -0.27611 | 7.572145 | -3.10611  | 0.00601  | 0.216536 | -2.1952  |
| CMTM8     | 8078397 | -0.28423 | 6.877245 | -2.9536   | 0.008395 | 0.302059 | -2.44033 | STX4      | 7995017 | 0.248874 | 7.160396 | -3.10566  | 0.00601  | 0.216536 | -2.19547 |
| ALG1      | 7993071 | 0.255953 | 7.002775 | -2.95324  | 0.008396 | 0.302059 | -2.44046 | FNIP1     | 8113914 | -0.21522 | 7.699603 | -3.10545  | 0.00601  | 0.216536 | -2.19647 |
| CASP14    | 8026398 | -0.23622 | 7.804139 | -2.95336  | 0.008399 | 0.302059 | -2.44075 | MOGAT3    | 8141676 | 0.768303 | 6.861926 | -3.105305 | 0.006021 | 0.216536 | -2.19675 |
| PNPLR8    | 8142307 | 0.305584 | 6.530992 | -2.95282  | 0.008409 | 0.302059 | -2.44175 |           | 7895440 | -0.30152 | 9.685641 | -3.10524  | 0.00602  | 0.216536 | -2.19688 |
| HGD       | 8089951 | -0.36239 | 11.26647 | -2.95215  | 0.008421 | 0.302059 | -2.44287 | GCV111    | 7966938 | 0.214235 | 7.488282 | -3.10329  | 0.006048 | 0.216598 | -2.20064 |
| HSD       | 8043728 | -0.95123 | 11.25647 | -2.95215  | 0.009423 | 0.302059 | -2.44287 |           | 7993054 | 0.647739 | 7.095937 | -3.10289  | 0.006053 | 0.216598 | -2.20141 |
| LOC10050  | 7982084 | -0.77853 | 7.778157 | -2.95196  | 0.008425 | 0.302059 | -2.44333 |           | 7987282 | -0.31428 | 10.56344 | -3.10288  | 0.006053 | 0.216598 | -2.20143 |
| SIGMAR1   | 8160857 | 0.289066 | 6.028893 | -2.951793 | 0.008428 | 0.302059 | -2.44363 |           | 8156339 | -0.28856 | 2.678131 | -3.10107  | 0.006077 | 0.217474 | -2.20494 |
| ANAPC15   | 7950128 | 0.32106  | 6.837543 | -2.950267 | 0.008456 | 0.302776 | -2.44643 |           | 7894282 | 0.171672 | 10.50796 | -3.100102 | 0.00609  | 0.217474 | -2.2068  |
| SEC6A1    | 8082408 | 0.369119 | 9.851948 | -2.948073 | 0.008496 | 0.302776 | -2.45045 |           | 8145685 | -0.68109 | 5.673704 | -3.09986  | 0.006094 | 0.217474 | -2.20728 |
| LYRM2 /// | 7999752 | 0.435795 | 7.816881 | -2.947434 | 0.008508 | 0.302776 | -2.45162 | NANOG     | 7987365 | -0.38988 | 5.408491 | -3.09943  | 0.006099 | 0.217474 | -2.2081  |
| DPYSL2    | 8145470 | 0.401392 | 7.958623 | -2.947246 | 0.008511 | 0.302776 | -2.45197 | TBC1D22B  | 8119169 | 0.226757 | 6.079057 | -3.099365 | 0.0061   | 0.217474 | -2.20822 |
| CAMK2G    | 7934477 | 0.212471 | 7.633156 | -2.946843 | 0.008519 | 0.302776 | -2.4527  | FAM59A    | 8022803 | -0.33917 | 6.676395 | -3.09887  | 0.006107 | 0.217477 | -2.20918 |
|           | 7919160 | 0.397915 | 4.002433 | -2.946794 | 0.00852  | 0.302776 | -2.45279 | TTCC40    | 7937112 | -0.24897 | 3.071979 | -3.09712  | 0.00613  | 0.218083 | -2.21256 |
|           | 7919166 | 0.397915 | 4.002433 | -2.946794 | 0.00852  | 0.302776 | -2.45279 |           | 7892615 | 0.668639 | 6.48823  | -3.094673 | 0.00614  | 0.21878  | -2.21278 |
|           | 7957536 | -0.50474 | 5.81491  | -2.94677  | 0.00852  | 0.302776 | -2.45284 | FABP5 /// | 8147049 | 0.45551  | 4.702001 | -3.094142 | 0.006171 | 0.21878  | -2.21831 |
| FRK030    | 8130032 | 0.279422 | 7.151905 | -2.945118 | 0.008551 | 0.303544 | -2.45687 | DSG1      | 8020774 | -0.55945 | 7.367165 | -3.09332  | 0.006182 | 0.21878  | -2.21989 |
|           | 7893514 | -0.77113 | 5.215833 | -2.94359  | 0.008579 | 0.303578 | -2.45866 |           | 7893570 | -1.22218 | 3.655849 | -3.09308  | 0.006185 | 0.21878  | -2.22035 |
| MAGEA4    | 8170531 | -0.25569 | 2.187296 | -2.9425   | 0.008581 | 0.303578 | -2.45883 | CENPC1    | 8100603 | -0.50749 | 7.388889 | -3.0928   | 0.006189 | 0.21878  | -2.22089 |
|           | 8109303 | 0.27456  | 2.384237 | -2.94283  | 0.008594 | 0.303578 | -2.46006 |           | 7892898 | -0.54023 | 5.566705 | -3.09262  | 0.006191 | 0.21878  | -2.22125 |
|           | 7893253 | -0.47782 | 4.560832 | -2.94271  | 0.008596 | 0.303578 | -2.46029 | ODF2      | 8158269 | 0.248124 | 6.52066  | -3.092282 | 0.006196 | 0.21878  | -2.2219  |
| YWHAB     | 8062880 | 0.255716 | 6.731866 | -2.942626 | 0.008598 | 0.303578 | -2.46043 | FAM160A1  | 8097801 | -0.54243 | 6.684559 | -3.09146  | 0.006207 | 0.218828 | -2.22348 |
| HARS      | 8114628 | 0.255789 | 7.437574 | -2.940739 | 0.008633 | 0.303979 | -2.46389 | VIPR2     | 8144213 | -0.56076 | 3.356046 | -3.09094  | 0.006214 | 0.218828 | -2.22449 |
|           | 7893127 | -0.97133 | 3.684063 | -2.94057  | 0.008636 | 0.303979 | -2.46419 |           | 7895917 | -0.41714 | 8.445625 | -3.09018  | 0.006225 | 0.218828 | -2.22595 |
| CMAS      | 7954407 | 0.380451 | 7.329814 | -2.940561 | 0.008636 | 0.303979 | -2.46421 | ZNF347    | 8039054 | -0.35151 | 4.678369 | -3.09005  | 0.006226 | 0.218828 | -2.2262  |
|           | 7960898 | -0.23984 | 5.024254 | -2.9393   | 0.00866  | 0.304311 | -2.46652 | CYP2C19   | 7929478 | -1.10367 | 10.15104 | -3.08875  | 0.006244 | 0.218828 | -2.22872 |
| TRH       | 8082574 | -0.21692 | 3.97469  | -2.93909  | 0.008664 | 0.304311 | -2.46691 |           | 7892879 | 0.571824 | 2.809583 | -3.088601 | 0.006246 | 0.218828 | -2.229   |
| AMPD3     | 7938396 | 0.374947 | 4.334543 | -2.936041 | 0.008722 | 0.306015 | -2.47249 | MYD88     | 8078729 | 0.283731 | 7.589438 | -3.088368 | 0.00625  | 0.218828 | -2.22945 |
| RIKC2     | 8113286 | 0.265851 | 5.823547 | -2.935107 | 0.008739 | 0.306315 | -2.4742  | PHF7      | 8080306 | -0.27427 | 5.651098 | -3.08834  | 0.00625  | 0.218828 | -2.22951 |
|           | 8025588 | -0.49423 | 5.179862 | -2.934    | 0.008753 | 0.306322 | -2.47623 |           | 8014749 | 0.259973 | 6.251264 | -3.08939  | 0.006311 | 0.220304 | -2.23    |
|           | 7895839 | 0.768812 | 3.620343 | -2.93398  | 0.008761 | 0.306422 | -2.47626 |           | 8030352 | 0.414091 | 2.987098 | -3.083304 | 0.00632  | 0.220304 | -2.23922 |
| ECT2      | 8083941 | 0.30801  | 4.13455  | -2.933346 | 0.008773 | 0.306523 | -2.47742 | GATSL3    | 8075322 | -0.29318 | 5.439917 | -3.08307  | 0.006323 | 0.220304 | -2.23968 |
| EXT2      | 7939524 | 0.234622 | 6.186396 | -2.932658 | 0.008786 | 0.30666  | -2.47868 | RBM14-RB  | 7941709 | 0.242605 | 7.579698 | -3.082976 | 0.006324 | 0.220304 | -2.23986 |
| SIRT7     | 8019296 | -0.26053 | 5.346043 | -2.93182  | 0.008802 | 0.3069   | -2.48022 | PAN3      | 7968274 | -0.25231 | 7.856845 | -3.08265  | 0.006329 | 0.220304 | -2.24049 |
| SNX16     | 8151572 | 0.316114 | 3.778752 | -2.928941 | 0.008858 | 0.308271 | -2.48548 |           | 7952225 | 0.254565 | 5.203027 | -3.082421 | 0.006332 | 0.220304 | -2.24093 |
|           | 7947127 | -0.28018 | 2.70009  | -2.92881  | 0.008876 | 0.308271 | -2.48572 |           | 7893949 | -0.39162 | 8.686978 | -3.08015  | 0.006364 | 0.221176 | -2.24531 |
| SCLT17A   | 8132503 | 0.344908 | 5.9214   | -2.927858 | 0.008878 | 0.308587 | -2.48746 | BHLHE40   | 8077441 | 0.458876 | 8.201148 | -3.079344 | 0.006375 | 0.221304 | -2.24686 |
| ANKH      | 8111101 | 0.227209 | 8.299628 | -2.925872 | 0.008917 | 0.3096   | -2.4911  | GPR89A // | 7904853 | -0.35501 | 7.058676 | -3.07894  | 0.006381 | 0.221304 | -2.24765 |
| IPK2      | 8087201 | 0.245284 | 7.070275 | -2.92502  | 0.008928 | 0.309661 | -2.49214 | OCLM      | 7908347 | -0.52496 | 5.933311 | -3.0784   | 0.006388 | 0.221335 | -2.24868 |
| HAND1     | 8115391 | -0.23227 | 7.821425 | -2.92467  | 0.00894  | 0.309761 | -2.49328 | MTIP2     | 7925413 | -0.31891 | 6.335336 | -3.07772  | 0.006398 | 0.221435 | -2.24999 |
| RRP1B     | 8068902 | 0.285244 | 6.578573 | -2.923653 | 0.008966 | 0.310323 | -2.49568 |           | 8096391 | -0.28065 | 5.401794 | -3.07604  | 0.006421 | 0.22202  | -2.25323 |
| SNORA16   | 7952021 | 0.289573 | 7.926678 | -2.922732 | 0.008978 | 0.310427 | -2.49667 | SPS1A     | 7993320 | -0.45596 | 5.363222 | -3.07454  | 0.006403 | 0.22202  | -2.25436 |
| SNORD11C  | 7981963 | -0.26185 | 5.896312 | -2.92205  | 0.009014 | 0.310945 | -2.50017 | SMARCA1   | 8174985 | -0.21522 | 6.933745 | -3.07483  | 0.006428 | 0.22202  | -2.25556 |
| MYR1      | 7895562 | 0.462184 | 6.300673 | -2.920408 | 0.009023 | 0.310945 | -2.50109 |           | 7893705 | -0.55665 | 7.411078 | -3.07463  | 0.006441 | 0.22202  | -2.25595 |
| PTPLB     | 8086689 | -0.3181  | 3.902738 | -2.9196   | 0.009039 | 0.310945 | -2.50257 |           | 7892903 | -0.63179 | 6.364589 | -3.07234  | 0.006474 | 0.222644 | -2.26037 |
| NRNP      | 7908779 | 0.290682 | 7.953021 | -2.919434 | 0.009043 | 0.310945 | -2.50286 |           | 7895178 | -0.34309 | 6.61515  | -3.07158  | 0.006484 | 0.222644 | -2.26183 |
| PEX3      | 8122409 | 0.306834 | 6.789429 | -2.919259 | 0.009046 | 0.310945 | -2.50319 | SLCOA41   | 8063923 | 0.367973 | 3.809293 | -3.070777 | 0.006496 | 0.222644 | -2.26337 |
|           | 7928489 | -0.3928  | 5.869571 | -2.91904  | 0.00905  | 0.310945 | -2.50358 |           | 7895576 | -0.78061 | 6.238863 | -3.07057  | 0.006499 | 0.222644 | -2.26378 |
| CBOR17    | 8148463 | -0.29182 | 8.120498 | -2.91854  | 0.00906  | 0.310945 | -2.50451 | CAMK1D    | 7926223 | 0.401176 | 7.271769 | -3.069733 | 0.006511 | 0.222644 | -2.26538 |
| SCL27A4   | 8158224 | 0.305314 | 6.85862  | -2.91793  | 0.009072 | 0.310945 | -2.50561 |           | 7907462 | -0.238   | 2.760083 | -3.06874  | 0.006525 | 0.222644 | -2.26731 |
| PRSS8     | 8001007 | 0.600937 | 5.983997 | -2.917232 | 0.009086 | 0.310945 | -2.50689 | MYOT      | 8108256 | -0.41326 | 3.604505 | -3.06729  | 0.006546 | 0.222644 | -2.2701  |
| ZNF141    | 8093336 | -0.19867 | 7.486013 | -2.91699  | 0.009101 | 0.310945 | -2.50734 | MSI2      | 8008682 | 0.2158   | 6.171259 | -3.067175 | 0.006547 | 0.222644 | -2.27031 |
|           | 8117656 | -0.3514  | 10.27739 | -2.91622  | 0.009106 | 0.310945 | -2.50875 | RRBP6     | 7994161 | -0.20666 | 7.714326 | -3.06693  | 0.006551 | 0.222644 | -2.27078 |
| SNX5      | 8054923 | -0.49423 | 5.179862 | -2.91594  | 0.009113 | 0.310945 | -2.50948 |           | 7894353 | -0.47248 | 6.121094 | -3.06694  | 0.006559 | 0.222644 | -2.27195 |
| CHD1L     | 7904883 | 0.391279 | 6.484175 | -2.915797 | 0.009114 | 0.310945 | -2.50951 | SPRYD3    | 7963577 | 0.30545  | 5.952943 | -3.066406 | 0.006559 | 0.222644 | -2.27179 |
| MYL113A   | 8124531 | 0.442369 | 6.145969 | -2.915172 | 0.009127 | 0.311049 | -2.51065 | CDH15     | 7997880 | 0.947715 | 6.010485 | -3.06546  | 0.006572 | 0.222644 | -2.27362 |
| C19orf53  | 8026193 | 0.193828 | 8.312879 | -2.913452 | 0.009161 | 0.311581 | -2.5138  |           | 7895919 | -0.49965 | 8.591146 | -3.06477  | 0.006582 | 0.222644 | -2.27495 |
|           | 7895143 | -0.53766 | 5.896012 | -2.91345  | 0.009161 | 0.311581 | -2.51381 | TBC1D23   | 8081256 | -0.22044 | 7.570864 | -3.06466  | 0.006584 | 0.222644 | -2.27515 |
|           | 7894745 | -0.52277 | 2.45211  | -2.91282  | 0.009174 | 0.311677 | -2.51495 | SPP1      | 8096301 | 0.103731 | 6.763019 | -3.064418 | 0.006587 | 0.222644 | -2.27562 |
|           | 8143984 | -0.28408 | 3.428084 | -2.91166  | 0.009197 | 0.311677 | -2.51707 |           | 7894428 | 0.306579 | 7.292115 | -3.063641 | 0.006598 | 0.222644 | -2.27712 |
| ZWILCH    | 7984330 | 0.301709 | 5.800866 | -2.910901 | 0.009212 | 0.311677 | -2.51845 |           | 7893838 | -0.33467 | 10.49834 | -3.06278  | 0.006611 | 0.222644 | -2.27878 |
| ABC8      | 8140752 | 0.440577 | 9.691714 | -2.910837 | 0.009213 | 0.311677 | -2.51857 | BAAT      | 8162870 | -0.33887 | 11.68716 | -3.06243  | 0.006616 |          |          |

|            |         |           |          |          |          |          |          |
|------------|---------|-----------|----------|----------|----------|----------|----------|
| UNC119B    | 7959212 | 0.271538  | 5.853134 | 3.017763 | 0.007297 | 0.230466 | -2.3653  |
| ANXAS      | 8102619 | 0.440955  | 8.602816 | 3.017684 | 0.007298 | 0.230466 | -2.36545 |
| FLI45079   | 8018818 | -0.19834  | 2.652971 | -0.10741 | 0.007302 | 0.230466 | -2.36596 |
| #NV        | 8161737 | -0.41852  | 5.530209 | -0.1681  | 0.007312 | 0.230553 | -2.36713 |
| RN7SKP1    | 7971075 | 0.223446  | 2.095273 | 3.01572  | 0.007329 | 0.230792 | -2.36921 |
| #NV        | 7993974 | -0.27255  | 7.378743 | -0.1479  | 0.007344 | 0.230792 | -2.371   |
| #NV        | 8091885 | -0.20406  | 2.180667 | -0.1439  | 0.007351 | 0.230792 | -2.37177 |
| POIG       | 7991258 | 0.185785  | 6.155724 | 3.014324 | 0.007352 | 0.230792 | -2.37189 |
| PION       | 8140478 | -0.33051  | 8.163154 | -0.1418  | 0.007354 | 0.230792 | -2.37217 |
| #NV        | 7895332 | -0.70258  | 4.538412 | -0.1178  | 0.007393 | 0.231771 | -2.37676 |
| #NV        | 7994570 | -0.56296  | 5.000217 | -0.1138  | 0.007399 | 0.231771 | -2.37753 |
| #NV        | 7896240 | 0.344506  | 8.223079 | 3.008551 | 0.007445 | 0.232529 | -2.38296 |
| #NV        | 7894830 | 0.457978  | 6.198987 | 3.00816  | 0.007452 | 0.232529 | -2.38371 |
| #NV        | 8180390 | 0.291174  | 6.47678  | 3.007125 | 0.007468 | 0.232529 | -2.38569 |
| #NV        | 7933929 | -0.50924  | 3.076398 | -0.00705 | 0.00747  | 0.232529 | -2.38584 |
| ZMYND12    | 7915425 | -0.3323   | 5.449726 | -0.00674 | 0.007475 | 0.232529 | -2.38643 |
| RAP2B      | 8083457 | 0.309155  | 6.187474 | 3.00653  | 0.007478 | 0.232529 | -2.38683 |
| PLGLA ///  | 8044149 | -0.19427  | 8.861755 | -0.00646 | 0.007479 | 0.232529 | -2.38696 |
| DNMT1      | 8033912 | 0.332735  | 6.150795 | 3.005696 | 0.007492 | 0.232529 | -2.38843 |
| #NV        | 7894570 | -1.27523  | 3.582526 | -3.00555 | 0.007494 | 0.232529 | -2.38897 |
| HMCN1      | 7908204 | 0.596872  | 6.992084 | 3.005469 | 0.007496 | 0.232529 | -2.38886 |
| RS5        | 8146685 | 0.241013  | 5.206216 | 3.004029 | 0.007519 | 0.232529 | -2.39162 |
| ZNF141     | 8093336 | -0.20456  | 7.486013 | -0.00334 | 0.007531 | 0.232529 | -2.39295 |
| ARHGAP5    | 7973840 | -0.1981   | 7.515647 | -0.00284 | 0.007539 | 0.232529 | -2.3939  |
| TAOK2      | 7994692 | 0.176734  | 6.968891 | 3.002821 | 0.007539 | 0.232529 | -2.39394 |
| SLCO1A2    | 7961626 | -1.0064   | 5.43882  | -0.0019  | 0.007554 | 0.232529 | -2.39569 |
| XAGE-4     | 8173176 | 0.41287   | 3.749163 | 3.00189  | 0.007554 | 0.232529 | -2.39572 |
| GABRE ///  | 8175666 | 0.813462  | 6.186229 | 3.001709 | 0.007557 | 0.232529 | -2.39607 |
| PRAMEF10   | 7912561 | 0.611151  | 3.728909 | 3.001538 | 0.00756  | 0.232529 | -2.39639 |
| #NV        | 7899322 | -0.40827  | 7.50106  | -0.00135 | 0.007563 | 0.232529 | -2.39675 |
| MTOR       | 7912412 | 0.241495  | 8.130458 | 3.000942 | 0.00757  | 0.232529 | -2.39753 |
| KPNA2      | 8013977 | 0.617831  | 6.277191 | 3.000047 | 0.007585 | 0.232529 | -2.39929 |
| DSG3       | 8020762 | 0.208135  | 2.495803 | 2.999458 | 0.007595 | 0.232529 | -2.40038 |
| MTMR4      | 8017019 | -0.22548  | 9.430489 | -2.9993  | 0.007597 | 0.232529 | -2.40067 |
| FEM1A      | 8024898 | 0.47294   | 4.523553 | 2.99913  | 0.0076   | 0.232529 | -2.401   |
| SNORD115   | 7982070 | -0.68782  | 5.035176 | -2.99821 | 0.007615 | 0.232529 | -2.40276 |
| #NV        | 8180206 | -0.20473  | 6.152655 | -2.99597 | 0.007653 | 0.232529 | -2.40705 |
| FCFAB4B    | 7960381 | -0.39822  | 5.697534 | -2.99542 | 0.007662 | 0.232529 | -2.40811 |
| #NV        | 7894731 | -0.45875  | 5.50091  | -2.99498 | 0.007669 | 0.232529 | -2.40895 |
| #NV        | 7894935 | -0.45875  | 5.50091  | -2.99498 | 0.007669 | 0.232529 | -2.40895 |
| #NV        | 7894918 | -1.13749  | 3.296845 | -2.99482 | 0.007672 | 0.232529 | -2.40925 |
| #NV        | 7896214 | -1.13749  | 3.296845 | -2.99482 | 0.007672 | 0.232529 | -2.40925 |
| KCNQ1      | 8172493 | 0.304287  | 4.454913 | 2.994804 | 0.007672 | 0.232529 | -2.40929 |
| #NV        | 810681  | -0.458288 | 4.81318  | -2.99466 | 0.007675 | 0.232529 | -2.40956 |
| #NV        | 8019910 | 0.223219  | 2.77244  | 2.994353 | 0.00768  | 0.232529 | -2.41015 |
| C6orf25    | 8179313 | 0.234193  | 4.341404 | 2.993644 | 0.007692 | 0.232529 | -2.41151 |
| TRAF7      | 7992529 | 0.235243  | 7.001472 | 2.993617 | 0.007692 | 0.232529 | -2.41156 |
| POLR3B     | 7958275 | -0.25203  | 6.763283 | -2.99358 | 0.007693 | 0.232529 | -2.41163 |
| LRRCS8     | 8089830 | -0.21969  | 7.340514 | -2.99311 | 0.007701 | 0.232529 | -2.41253 |
| FOX2       | 8135544 | -0.35369  | 6.138001 | -2.99303 | 0.007702 | 0.232529 | -2.41269 |
| #NV        | 8115677 | -0.17097  | 1.997033 | -2.993   | 0.007703 | 0.232529 | -2.41274 |
| FKBP1B     | 8040530 | 0.391574  | 5.974593 | 2.992541 | 0.00771  | 0.232529 | -2.41362 |
| HSF4       | 7996430 | 0.387515  | 6.144565 | 2.990736 | 0.007741 | 0.233258 | -2.41707 |
| SNORA55    | 7915227 | 0.51745   | 6.174885 | 2.989041 | 0.00777  | 0.233912 | -2.42031 |
| #NV        | 7996805 | -0.58733  | 4.021186 | -2.98861 | 0.007777 | 0.233919 | -2.42113 |
| ZC3HC11    | 7915415 | -0.20944  | 7.388767 | -2.98735 | 0.007798 | 0.234352 | -2.42354 |
| SNORD115   | 7982060 | -0.35235  | 2.314553 | -2.98677 | 0.007808 | 0.234439 | -2.42466 |
| NADK       | 7911600 | 0.333842  | 7.345943 | 2.986293 | 0.007816 | 0.234473 | -2.42557 |
| LOC10065   | 8007976 | -0.22174  | 8.420021 | -2.98354 | 0.007864 | 0.235677 | -2.43085 |
| CBR4       | 8103622 | -0.35242  | 7.791335 | -2.98288 | 0.007875 | 0.235801 | -2.43209 |
| GNB2       | 8134890 | 0.199344  | 7.65133  | 2.981068 | 0.007906 | 0.236314 | -2.43556 |
| PARK2      | 8130645 | -0.33065  | 5.709999 | -2.98071 | 0.007912 | 0.236314 | -2.43624 |
| ZNF808     | 8030946 | -0.38931  | 7.617566 | -2.98065 | 0.007913 | 0.236314 | -2.43635 |
| CCT3       | 7920984 | 0.258736  | 8.212432 | 2.980077 | 0.007923 | 0.2364   | -2.43746 |
| METTL20    | 7954701 | -0.37336  | 5.634403 | -2.9788  | 0.007945 | 0.236846 | -2.43989 |
| SNORA57    | 7940667 | 0.701546  | 7.113458 | 2.977346 | 0.007971 | 0.237388 | -2.44268 |
| #NV        | 8078497 | -0.32684  | 3.559217 | -2.97515 | 0.008009 | 0.238132 | -2.44687 |
| UBRN7      | 8093312 | -0.21736  | 7.901647 | -2.97509 | 0.008001 | 0.238132 | -2.44698 |
| TSSK3      | 7899790 | -0.29505  | 4.155686 | -2.97248 | 0.008056 | 0.239097 | -2.45197 |
| RN7SKP8    | 7972442 | -0.26166  | 3.604323 | -2.97226 | 0.00806  | 0.239097 | -2.4524  |
| PTPN4      | 8044849 | -0.22254  | 6.009865 | -2.97192 | 0.008066 | 0.239097 | -2.45304 |
| RPL10 ///  | 8170863 | 0.251577  | 9.14646  | 2.970668 | 0.008088 | 0.239097 | -2.45543 |
| #NV        | 7893491 | -0.33949  | 9.205566 | -2.97059 | 0.008089 | 0.239097 | -2.45558 |
| FAM185A    | 8140461 | -0.30315  | 7.217166 | -2.97052 | 0.00809  | 0.239097 | -2.45572 |
| LRRC40     | 7916910 | -0.30848  | 6.957444 | -2.96877 | 0.008121 | 0.239097 | -2.45906 |
| HIST1H4A   | 7961483 | 0.324184  | 8.657473 | 2.968734 | 0.008122 | 0.239097 | -2.45913 |
| NAP1L2     | 8173600 | 0.218913  | 2.844046 | 2.968559 | 0.008125 | 0.239097 | -2.45946 |
| SFXN2      | 7930148 | -0.35586  | 7.99519  | -2.96813 | 0.008133 | 0.239097 | -2.46029 |
| #NV        | 8056823 | 0.245862  | 2.38667  | 2.967769 | 0.008139 | 0.239097 | -2.46097 |
| FOXN3      | 7990680 | -0.26707  | 8.655795 | -2.96773 | 0.00814  | 0.239097 | -2.46105 |
| WASL       | 8132671 | -0.18054  | 8.296281 | -2.96759 | 0.008142 | 0.239097 | -2.4613  |
| #NV        | 8078384 | -0.18553  | 1.896241 | -2.96733 | 0.008147 | 0.239097 | -2.46181 |
| CDH26      | 8063761 | -0.29528  | 3.701782 | -2.96713 | 0.00815  | 0.239097 | -2.46218 |
| SLC26A6    | 8087119 | 0.32062   | 5.460669 | 2.966742 | 0.008157 | 0.239097 | -2.46293 |
| #NV        | 7895946 | -0.50904  | 7.921987 | -2.96615 | 0.008168 | 0.239196 | -2.46406 |
| DNAJB11    | 8084634 | 0.375172  | 7.303156 | 2.965014 | 0.008188 | 0.239404 | -2.46623 |
| PI4K2A     | 7929677 | 0.38164   | 6.27656  | 2.964945 | 0.008189 | 0.239404 | -2.46636 |
| ATPB04     | 7987369 | -0.31537  | 6.574893 | -2.96419 | 0.008203 | 0.239586 | -2.4678  |
| #NV        | 7894828 | -0.39505  | 1.946143 | -2.96334 | 0.008218 | 0.239703 | -2.46941 |
| #NV        | 7895538 | -0.54485  | 6.970315 | -2.9631  | 0.008222 | 0.239703 | -2.46987 |
| SNORD115   | 7982088 | -0.64573  | 2.378537 | -2.96277 | 0.008228 | 0.239703 | -2.47052 |
| #NV        | 7893726 | -0.38708  | 5.876254 | -2.96212 | 0.00824  | 0.239788 | -2.47175 |
| CYP2A13    | 8028973 | -0.37882  | 11.32222 | -2.96147 | 0.008252 | 0.239788 | -2.47208 |
| WEI1       | 7938448 | -0.22523  | 6.215707 | -2.9614  | 0.008253 | 0.239788 | -2.47312 |
| NEK8       | 8005959 | 0.248009  | 4.662067 | 2.959735 | 0.008283 | 0.240183 | -2.4763  |
| PHC3       | 8092035 | -0.22408  | 9.176166 | -2.95948 | 0.008288 | 0.240183 | -2.47679 |
| PCBP1      | 8042515 | 0.243942  | 8.701592 | 2.959447 | 0.008288 | 0.240183 | -2.47685 |
| GAPDHP27   | 7919049 | -0.30346  | 3.821864 | -2.95809 | 0.008313 | 0.240391 | -2.47944 |
| ZNF254     | 8027368 | -0.36974  | 7.018581 | -2.95775 | 0.008319 | 0.240391 | -2.4801  |
| ACTB /// U | 8137979 | 0.230186  | 11.87195 | 2.957288 | 0.008327 | 0.240391 | -2.48097 |
| ENFP1      | 8122099 | -0.24109  | 10.23621 | -2.9569  | 0.008334 | 0.240391 | -2.48171 |
| #NV        | 7894960 | -0.42093  | 8.598866 | -2.95676 | 0.008337 | 0.240391 | -2.48197 |
| NLRP14     | 7938195 | -0.4215   | 3.91463  | -2.95648 | 0.008342 | 0.240391 | -2.48251 |
| #NV        | 8058693 | 0.24631   | 2.48082  | 2.955877 | 0.008353 | 0.240391 | -2.48366 |
| HTR5A      | 8137517 | 0.23726   | 3.536764 | 2.955866 | 0.008353 | 0.240391 | -2.48368 |
| ESRRB      | 7975876 | -0.21498  | 3.197919 | -2.95325 | 0.008401 | 0.24062  | -2.48866 |
| TTL8 /// T | 8076882 | 0.182343  | 3.414379 | 2.953238 | 0.008401 | 0.24062  | -2.48869 |
| #NV        | 7924551 | -0.28454  | 6.69429  | -2.95307 | 0.008404 | 0.24062  | -2.48901 |
| #NV        | 7925523 | -0.28454  | 6.69429  | -2.95307 | 0.008404 | 0.24062  | -2.48901 |
| #NV        | 8132690 | -0.28454  | 6.69429  | -2.95307 | 0.008404 | 0.24062  | -2.48901 |
| KLKB1      | 8098654 | -0.1803   | 11.15619 | -2.95274 | 0.00841  | 0.24062  | -2.48964 |
| ZFH4       | 8147000 | -0.30066  | 7.894217 | -2.95242 | 0.008416 | 0.24062  | -2.49025 |
| TOR1AIP2   | 7922637 | -0.25763  | 8.749988 | -2.95223 | 0.00842  | 0.24062  | -2.49061 |
| BOP1       | 8153664 | 0.224467  | 5.875129 | 2.950276 | 0.008455 | 0.24062  | -2.49434 |
| TRIM16 /// | 8005475 | -0.26304  | 6.669353 | -2.95009 | 0.008459 | 0.24062  | -2.49469 |
| #NV        | 7895084 | 0.398042  | 8.067585 | 2.950013 | 0.00846  | 0.24062  | -2.49484 |
| ZC3HC1C    | 7975772 | 0.32326   | 4.507995 | 2.949464 | 0.00847  | 0.24062  | -2.49589 |
| LRG1       | 7964602 | -0.2802   | 7.375761 | -2.94939 | 0.008473 | 0.24062  | -2.49614 |
| CCDC144A   | 8013479 | -0.55623  | 5.851612 | -2.94874 | 0.008484 | 0.24062  | -2.49727 |
| ABCF1      | 8117929 | 0.271885  | 7.379436 | 2.948736 | 0.008484 | 0.24062  | -2.49727 |
| ABCF1      | 8177797 | 0.271885  | 7.379436 | 2.948736 | 0.008484 | 0.24062  | -2.49727 |
| ABCF1      | 8179112 | 0.271885  | 7.379436 | 2.948736 | 0.008484 | 0.24062  | -2.49727 |
| FAM50A     | 8170906 | 0.229289  | 7.246598 | 2.947948 | 0.008498 | 0.240829 | -2.49877 |
| PDIA6      | 8050278 | 0.267431  | 9.661318 |          |          |          |          |



|            |         |            |          |           |          |          |          |
|------------|---------|------------|----------|-----------|----------|----------|----------|
| SCN2A      | 8046020 | -0.2749    | 3.106751 | -2.94023  | 0.008643 | 0.242844 | -2.51347 |
| OSGEP11    | 8057689 | -0.28987   | 5.867877 | -2.93822  | 0.00868  | 0.243411 | -2.5173  |
| FAM59B     | 8040632 | 0.225455   | 4.233627 | 2.937642  | 0.008691 | 0.243411 | -2.5184  |
| SH3D19     | 8103166 | -0.21009   | 8.057231 | -2.93757  | 0.008693 | 0.243411 | -2.51855 |
| #NV        | 7893123 | -0.47516   | 6.978402 | -2.93695  | 0.008705 | 0.243411 | -2.51972 |
| EGFL7      | 8159354 | 0.251081   | 5.713925 | 2.936301  | 0.008717 | 0.243411 | -2.52095 |
| #NV        | 7901852 | -0.38066   | 4.977944 | -2.9363   | 0.008717 | 0.243411 | -2.52096 |
| #NV        | 7895990 | -0.62008   | 5.208603 | -2.93583  | 0.008726 | 0.243411 | -2.52185 |
| TNAP       | 7971159 | -0.3247    | 3.000595 | -2.93562  | 0.00873  | 0.243411 | -2.52226 |
| VKORC1     | 8000998 | 0.482209   | 10.52004 | 2.935332  | 0.008735 | 0.243411 | -2.5228  |
| LOC10050   | 8056426 | -0.38092   | 6.547488 | -2.9353   | 0.008736 | 0.243411 | -2.52286 |
| #NV        | 8070755 | -0.26868   | 2.553565 | -2.93485  | 0.008744 | 0.243445 | -2.52371 |
| ARF1 /// N | 7910229 | 0.215399   | 10.01941 | 2.93291   | 0.008781 | 0.244202 | -2.52741 |
| MYO9B      | 8026638 | 0.249351   | 7.325513 | 2.932209  | 0.008795 | 0.244202 | -2.52874 |
| EIF2AK3    | 8053668 | 0.351567   | 6.457683 | 2.931659  | 0.008805 | 0.244202 | -2.52979 |
| DCUN1D1    | 8092321 | -0.3324    | 8.28249  | -2.93112  | 0.008816 | 0.244202 | -2.5308  |
| #NV        | 7942912 | -0.45417   | 5.924706 | -2.93083  | 0.008821 | 0.244202 | -2.53137 |
| SND1       | 8135876 | 0.292915   | 8.846291 | 2.930052  | 0.008836 | 0.244202 | -2.53284 |
| #NV        | 7917050 | -0.46008   | 6.908174 | -2.92963  | 0.008844 | 0.244202 | -2.53364 |
| FBXL4      | 7960280 | -0.29843   | 5.311185 | -2.92963  | 0.008844 | 0.244202 | -2.53365 |
| C7orf49 // | 8143065 | 0.298132   | 6.760068 | 2.928792  | 0.00886  | 0.244202 | -2.53524 |
| PIK3C2G    | 7954208 | -0.30056   | 8.528425 | -2.92841  | 0.008868 | 0.244202 | -2.53597 |
| KATR       | 7995055 | 0.145857   | 6.663424 | 2.928384  | 0.008868 | 0.244202 | -2.53602 |
| #NV        | 8068733 | 0.245901   | 2.246958 | 2.928333  | 0.008869 | 0.244202 | -2.53611 |
| SPTSSA     | 7978553 | 0.600858   | 5.626497 | 2.927672  | 0.008882 | 0.244202 | -2.53737 |
| #NV        | 7894613 | -0.3602    | 10.2024  | -2.92745  | 0.008886 | 0.244202 | -2.53779 |
| PLEKHO2    | 7984217 | 0.252693   | 5.938278 | 2.927242  | 0.00889  | 0.244202 | -2.53819 |
| WIP1       | 8017850 | 0.381355   | 6.127574 | 2.926884  | 0.008897 | 0.244202 | -2.53887 |
| WPXDC1     | 8123678 | 0.466264   | 8.799164 | 2.926563  | 0.008903 | 0.244202 | -2.53948 |
| PTFRK      | 8129418 | -0.19244   | 8.365974 | -2.92656  | 0.008904 | 0.244202 | -2.53948 |
| MLLT4      | 8123407 | -0.20937   | 8.249173 | -2.92578  | 0.008919 | 0.244229 | -2.54097 |
| CARD11     | 8137874 | 0.249322   | 4.480979 | 2.925495  | 0.008924 | 0.244229 | -2.54154 |
| #NV        | 7896251 | 0.794494   | 4.759009 | 2.925376  | 0.008927 | 0.244229 | -2.54173 |
| GPC5       | 7969596 | -0.50951   | 5.075856 | -2.92378  | 0.008958 | 0.24475  | -2.54476 |
| KCTD15     | 8027584 | 0.382804   | 8.563564 | 2.923641  | 0.00896  | 0.24475  | -2.54503 |
| #NV        | 8090934 | -0.27974   | 5.520329 | -2.92212  | 0.00899  | 0.245358 | -2.54792 |
| #NV        | 7982292 | -0.20058   | 2.259445 | -2.9202   | 0.009028 | 0.246186 | -2.55158 |
| RFC5       | 7959052 | -0.26089   | 7.010704 | -2.9179   | 0.009073 | 0.246404 | -2.55593 |
| #NV        | 7982533 | -0.22201   | 2.603546 | -2.91781  | 0.009075 | 0.246404 | -2.55612 |
| FPG5       | 8158123 | -0.23646   | 7.047735 | -2.91753  | 0.00908  | 0.246404 | -2.55664 |
| RS124D1P:  | 8021374 | -0.28442   | 2.88504  | -2.91711  | 0.009088 | 0.246404 | -2.55745 |
| #NV        | 8097947 | -0.22511   | 2.718974 | -2.91692  | 0.009092 | 0.246404 | -2.55781 |
| #NV        | 8123340 | -0.24103   | 3.806861 | -2.91599  | 0.009111 | 0.246404 | -2.55956 |
| RANGAP1    | 8076307 | 0.269766   | 7.04126  | 2.915409  | 0.009122 | 0.246404 | -2.56007 |
| #NV        | 7894178 | 0.679315   | 4.293788 | 2.915362  | 0.009123 | 0.246404 | -2.56076 |
| #NV        | 7896145 | 0.679315   | 4.293788 | 2.915362  | 0.009123 | 0.246404 | -2.56076 |
| SNORD115   | 7982040 | -0.51853   | 3.376602 | -2.91513  | 0.009128 | 0.246404 | -2.5612  |
| SNORD115   | 7982042 | -0.51853   | 3.376602 | -2.91513  | 0.009128 | 0.246404 | -2.5612  |
| SNORD115   | 7982044 | -0.51853   | 3.376602 | -2.91513  | 0.009128 | 0.246404 | -2.5612  |
| ST3GAL2    | 8002370 | 0.301401   | 6.528438 | 2.914616  | 0.009138 | 0.246404 | -2.56218 |
| SLC9A3R1   | 8009685 | 0.233109   | 8.952812 | 2.913494  | 0.00916  | 0.246404 | -2.56431 |
| #NV        | 8111913 | -0.28926   | 4.00573  | -2.91332  | 0.009164 | 0.246404 | -2.56465 |
| #NV        | 7895004 | -0.34434   | 8.365555 | -2.91288  | 0.009172 | 0.246404 | -2.56547 |
| FBXO17 //  | 8036676 | 0.390568   | 8.221484 | 2.912431  | 0.009181 | 0.246404 | -2.56633 |
| #NV        | 7896418 | -0.61884   | 6.327449 | -2.91242  | 0.009182 | 0.246404 | -2.56635 |
| DAPK3      | 8032718 | -0.299943  | 5.446162 | -2.912363 | 0.009183 | 0.246404 | -2.56646 |
| C15orf52   | 7987511 | 0.236434   | 4.47539  | 2.910965  | 0.009211 | 0.246404 | -2.56911 |
| RPS6KA1    | 7899192 | 0.377526   | 6.28841  | 2.910828  | 0.009213 | 0.246404 | -2.56937 |
| PDPK1 ///  | 7998825 | 0.208181   | 9.227292 | 2.910635  | 0.009217 | 0.246404 | -2.56974 |
| PNN        | 7974066 | 0.260139   | 8.298073 | 2.910206  | 0.009226 | 0.246404 | -2.57055 |
| ST3GAL1    | 8153021 | -0.24662   | 9.15566  | -2.91016  | 0.009227 | 0.246404 | -2.57064 |
| DMRTB1     | 7901557 | 0.223996   | 3.986622 | 2.909849  | 0.009233 | 0.246404 | -2.57123 |
| LOC10013:  | 7958724 | -0.25623   | 3.525926 | -2.90956  | 0.009239 | 0.246404 | -2.57178 |
| STK32C     | 7937089 | 0.230283   | 4.339462 | 2.909289  | 0.009244 | 0.246404 | -2.57229 |
| IRGQ       | 8037352 | 0.234018   | 4.206897 | 2.909176  | 0.009247 | 0.246404 | -2.57251 |
| APIG2      | 7978066 | 0.453397   | 6.512624 | 2.908989  | 0.00925  | 0.246404 | -2.57286 |
| #NV        | 7892501 | -0.72928   | 2.861398 | -2.90816  | 0.009267 | 0.24665  | -2.57443 |
| #NV        | 8130470 | 0.274729   | 5.230008 | 2.907245  | 0.009285 | 0.246654 | -2.57617 |
| #NV        | 7896574 | -0.56053   | 6.217453 | -2.90724  | 0.009286 | 0.246654 | -2.57619 |
| ARMGAP5:   | 7978538 | -0.36983   | 4.849341 | -2.90698  | 0.009291 | 0.246654 | -2.57667 |
| BMP2K      | 8096004 | -0.21876   | 6.962776 | -2.90636  | 0.009303 | 0.246654 | -2.57786 |
| KLHDC1     | 7974214 | -0.30971   | 7.053742 | -2.90632  | 0.009304 | 0.246654 | -2.57793 |
| CTBP1      | 8098880 | 0.1717     | 8.402547 | 2.905531  | 0.00932  | 0.246803 | -2.57942 |
| GORASP1    | 8086317 | 0.185604   | 5.689932 | 2.905121  | 0.009328 | 0.246803 | -2.5802  |
| MBNL3      | 8175177 | -0.2983    | 9.160786 | -2.90471  | 0.009337 | 0.246803 | -2.58099 |
| #NV        | 7892734 | -0.56287   | 5.449261 | -2.90439  | 0.009343 | 0.246803 | -2.58159 |
| LYPLAL1    | 7909801 | -0.30943   | 5.95147  | -2.90407  | 0.00935  | 0.246803 | -2.5822  |
| PHF3       | 8120441 | -0.21424   | 8.279413 | -2.90385  | 0.009354 | 0.246803 | -2.58262 |
| WTF1-AS    | 7939131 | -0.41861   | 3.09269  | -2.90308  | 0.00937  | 0.246896 | -2.58407 |
| #NV        | 8097805 | -0.35971   | 5.366995 | -2.90256  | 0.00938  | 0.246896 | -2.58507 |
| RALGAP1    | 7978653 | -0.28385   | 7.818001 | -2.90216  | 0.009389 | 0.246896 | -2.58582 |
| #NV        | 7923179 | -0.39387   | 3.899991 | -2.90194  | 0.009393 | 0.246896 | -2.58624 |
| NR4A2      | 8055952 | -0.38473   | 4.462699 | -2.90185  | 0.009395 | 0.246896 | -2.5864  |
| PSEN2      | 7910146 | 0.317893   | 5.859383 | 2.901     | 0.009412 | 0.247158 | -2.58802 |
| #NV        | 8113346 | 0.533522   | 3.395499 | 2.900364  | 0.009425 | 0.247305 | -2.58922 |
| KIAA2026   | 8160011 | -0.29197   | 9.03745  | -2.89987  | 0.009435 | 0.247374 | -2.59016 |
| MANEAL     | 7900183 | 0.313592   | 5.813396 | 2.89963   | 0.009496 | 0.248763 | -2.59573 |
| #NV        | 7893610 | -0.56576   | 3.92529  | -2.89481  | 0.00954  | 0.249285 | -2.59976 |
| #NV        | 7893298 | -0.56341   | 9.711731 | -2.89475  | 0.009541 | 0.249285 | -2.59987 |
| NTSE       | 8120967 | -0.42023   | 7.818171 | -2.89458  | 0.009544 | 0.249285 | -2.60019 |
| #NV        | 8163714 | -0.27034   | 8.374792 | -2.89451  | 0.009546 | 0.249285 | -2.60032 |
| #NV        | 7916851 | -0.22696   | 3.165461 | -2.89416  | 0.009553 | 0.249285 | -2.60099 |
| #NV        | 7892968 | 0.240097   | 7.267824 | 2.893597  | 0.009565 | 0.24932  | -2.60026 |
| #NV        | 7894094 | 0.543512   | 5.32246  | 2.893152  | 0.009574 | 0.24932  | -2.60289 |
| #NV        | 8167893 | -0.35004   | 4.103263 | -2.8927   | 0.009583 | 0.24932  | -2.60375 |
| PABPC3     | 7968128 | -0.15955   | 4.435676 | -2.89265  | 0.009584 | 0.24932  | -2.60385 |
| E2F4       | 7996455 | 0.22265    | 6.747396 | 2.890946  | 0.00962  | 0.249744 | -2.60707 |
| NOMO1 //   | 7993371 | 0.245138   | 9.720163 | 2.890428  | 0.009631 | 0.249744 | -2.60805 |
| NOMO1 //   | 7993511 | 0.245138   | 9.720163 | 2.890428  | 0.009631 | 0.249744 | -2.60805 |
| NOMO1 //   | 7999791 | 0.245138   | 9.720163 | 2.890428  | 0.009631 | 0.249744 | -2.60805 |
| GZMA       | 8105340 | 0.4657     | 4.539075 | 2.889725  | 0.009645 | 0.24993  | -2.60938 |
| #NV        | 8038343 | -0.47057   | 6.476754 | -2.8888   | 0.009665 | 0.250176 | -2.61114 |
| #NV        | 7895604 | 0.446017   | 8.063978 | 2.888419  | 0.009673 | 0.250176 | -2.61186 |
| #NV        | 7895302 | -0.77771   | 5.851282 | -2.8882   | 0.009677 | 0.250176 | -2.61228 |
| RHOQ /// I | 8045289 | 0.333717   | 7.180952 | 2.887016  | 0.009702 | 0.250482 | -2.61451 |
| #NV        | 8071817 | -0.24857   | 2.667434 | -2.88668  | 0.009709 | 0.250482 | -2.61515 |
| FASTK      | 8143863 | 0.286545   | 6.138808 | 2.886401  | 0.009715 | 0.250482 | -2.61568 |
| #NV        | 7896107 | -0.44419   | 7.346207 | -2.88604  | 0.009723 | 0.250482 | -2.61637 |
| USP53      | 8097098 | -0.26376   | 7.464312 | -2.88548  | 0.009735 | 0.250482 | -2.61742 |
| FICD       | 7958410 | 0.675188   | 5.695471 | 2.885097  | 0.009743 | 0.250482 | -2.61815 |
| PAH        | 7965884 | -0.18347   | 12.26052 | -2.88449  | 0.009747 | 0.250482 | -2.61852 |
| SWSAP1     | 8025888 | -0.19225   | 5.179986 | -2.88478  | 0.009749 | 0.250482 | -2.61875 |
| ZNF334     | 8066745 | -0.53223   | 5.198506 | -2.8831   | 0.009785 | 0.250918 | -2.62193 |
| #NV        | 8154221 | -0.29953   | 2.254082 | -2.88297  | 0.009788 | 0.250918 | -2.62217 |
| C19orf10   | 8032863 | 0.264961   | 7.632907 | 2.882772  | 0.009792 | 0.250918 | -2.62255 |
| CNKSRI2    | 8166355 | -0.43884   | 5.257172 | -2.88224  | 0.009803 | 0.250918 | -2.62356 |
| SNORA45    | 7952823 | 0.396704   | 5.738318 | 2.882059  | 0.009807 | 0.250918 | -2.62394 |
| SNORA70B   | 8053524 | -0.30844   | 4.396393 | -2.88083  | 0.009823 | 0.250918 | -2.62612 |
| #NV        | 7896247 | 0.438738   | 10.36099 | 2.880406  | 0.009842 | 0.250918 | -2.62703 |
| GPR148     | 8045216 | -0.24443   | 3.75864  | -2.88033  | 0.009844 | 0.250918 | -2.62717 |
| TXNDC16    | 7979158 | -0.33971   | 4.43798  | -2.87997  | 0.009852 | 0.250918 | -2.62786 |
| GPDI       | 7955348 | 0.441134   | 8.797955 | 2.879676  | 0.009858 | 0.250918 | -2.62841 |
| DPYSL2     | 8145470 | 0.392077   | 7.958623 | 2.878847  | 0.009876 | 0.250918 | -2.62998 |
| #NV        | 8111796 | -0.21346</ |          |           |          |          |          |

|        |         |          |          |          |          |          |          |
|--------|---------|----------|----------|----------|----------|----------|----------|
| STK17A | 8132503 | 0.338735 | 5.9214   | 2.875456 | 0.009948 | 0.25152  | -2.63639 |
| NPM1P8 | 8166659 | -0.25148 | 2.127608 | -2.87357 | 0.009989 | 0.252361 | -2.63996 |



**Table S5 Target genes of the top 3 active and inactive transcription factors in non-obese liver**

**filtered target genes of AACACUG in non-obese liver**

| Promoter        | Score | Gene Symbol | Name   | probe_ID | logFC    | PValue   | FDR      | Probe ID   | RELATION_T UCSC_REFGENE_GROUP | UCSC_REFGENE_NAME | ND-non    |
|-----------------|-------|-------------|--------|----------|----------|----------|----------|------------|-------------------------------|-------------------|-----------|
| chr8_+_17354562 | 0.446 | SLC7A2      | SLC7A2 | 8144786  | -0.4366  | 0.002735 | 0.237132 | cg02786378 | N/A Body;Body;5'UTR           | SLC7A2            | -6.50E-02 |
| chr9_+_90112754 | 0.456 | DAPK1       | DAPK1  | 8156199  | -0.39404 | 0.000735 | 0.197693 | cg14286732 | N/A Body                      | DAPK1             | -8.45E-02 |

**filtered target genes of AAGGCAC in non-obese liver**

| Promoter         | Score | Gene Symbol | Name    | probe_ID | logFC    | PValue   | FDR      | Probe ID   | RELATION_T UCSC_REFGENE_GROUP | UCSC_REFGENE_NAME | ND-non    |
|------------------|-------|-------------|---------|----------|----------|----------|----------|------------|-------------------------------|-------------------|-----------|
| chr9_-_130331350 | 1.183 | FAM129B     | FAM129B | 8164217  | 0.370197 | 0.00706  | 0.293466 | cg14409919 | N/A Body;Body                 | FAM129B           | -2.53E-02 |
| chr6_-_134496006 | 2.152 | SGK1        | SGK1    | 8129677  | 0.795798 | 0.004794 | 0.261671 | cg21078322 | N/A 3'UTR;3'UTR;3'UTR;3'UTR   | SGK1              | -9.01E-02 |

**filtered target genes of IKZF2 in non-obese liver**

| Promoter        | Score | Gene Symbol | Name | probe_ID | logFC    | PValue   | FDR      | Probe ID   | RELATION_T UCSC_REFGENE_GROUP | UCSC_REFGENE_NAME | ND-non    |
|-----------------|-------|-------------|------|----------|----------|----------|----------|------------|-------------------------------|-------------------|-----------|
| chr8_-_18541441 | 1.7   | PSD3        | PSD3 | 8149555  | -0.43479 | 0.004261 | 0.255766 | cg12082271 | N/A Body;Body                 | PSD3              | -5.96E-02 |

**filtered target genes of RBPJ in non-obese liver**

| Promoter          | Score | Gene Symbol | Name     | probe_ID | logFC    | PValue   | FDR      | Probe ID   | RELATION_T UCSC_REFGENE_GROUP | UCSC_REFGENE_NAME | ND-non    |
|-------------------|-------|-------------|----------|----------|----------|----------|----------|------------|-------------------------------|-------------------|-----------|
| chr8_-_18541441   | 0.638 | PSD3        | PSD3     | 8149555  | -0.43479 | 0.004261 | 0.255766 | cg12082271 | N/A Body;Body                 | PSD3              | -5.96E-02 |
| chr10_-_105437908 | 0.522 | SH3PXD2A    | SH3PXD2A | 7936115  | -0.51315 | 0.005999 | 0.280566 | cg12569119 | N/A Body                      | SH3PXD2A          | -5.34E-02 |
| chr10_-_105437908 | 0.522 | SH3PXD2A    | SH3PXD2A | 7936115  | -0.51315 | 0.005999 | 0.280566 | cg20241299 | Island Body                   | SH3PXD2A          | -3.45E-02 |

**filtered target genes of UUGGUCC in non-obese liver**

| Promoter         | Score | Gene Symbol | Name | probe_ID | logFC    | PValue   | FDR      | Probe ID   | RELATION_T UCSC_REFGENE_GROUP | UCSC_REFGENE_NAME | T2D-non   |
|------------------|-------|-------------|------|----------|----------|----------|----------|------------|-------------------------------|-------------------|-----------|
| chr6_+_143382030 | 0.968 | AIG1        | AIG1 | 8122396  | -0.24073 | 0.005884 | 0.216536 | cg21234032 | N/A Body                      | AIG1              | -2.44E-02 |

**filtered target genes of UUGGUCC in non-obese liver**

| Promoter         | Score | Gene Symbol | Name | probe_ID | logFC    | PValue   | FDR      | Probe ID   | RELATION_T UCSC_REFGENE_GROUP | UCSC_REFGENE_NAME | ND-non    |
|------------------|-------|-------------|------|----------|----------|----------|----------|------------|-------------------------------|-------------------|-----------|
| chr6_-_134496006 | 1.448 | SGK1        | SGK1 | 8129677  | 0.795798 | 0.004794 | 0.261671 | cg21078322 | N/A 3'UTR;3'UTR;3'UTR;3'UTR   | SGK1              | -9.01E-02 |

**filtered target genes of UUGGUCC in non-obese liver**

| Promoter         | Score | Gene Symbol | Name   | probe_ID | logFC    | PValue   | FDR      | Probe ID   | RELATION_T UCSC_REFGENE_GROUP | UCSC_REFGENE_NAME | T2D-non   |
|------------------|-------|-------------|--------|----------|----------|----------|----------|------------|-------------------------------|-------------------|-----------|
| chr12_-_49177876 | 0.555 | ADCY6       | ADCY6  | 7962842  | 0.327264 | 0.006701 | 0.222644 | cg00160359 | S_Shore 5'UTR;TSS1500         | ADCY6             | -0.0247   |
| chr19_+_34287662 | 0.568 | KCTD15      | KCTD15 | 8027584  | 0.382804 | 0.00896  | 0.24475  | cg04566826 | S_Shore 5'UTR;5'UTR;5'UTR     | KCTD15            | -3.09E-02 |
| chr16_+_58059281 | 0.89  | MMP15       | MMP15  | 7996185  | 0.337665 | 0.005773 | 0.216441 | cg05517218 | S_Shore 3'UTR                 | MMP15             | -3.31E-02 |
| chr16_+_58059281 | 0.89  | MMP15       | MMP15  | 7996185  | 0.337665 | 0.005773 | 0.216441 | cg05521581 | N_Shore Body                  | MMP15             | -4.17E-02 |
| chr12_-_49177876 | 0.555 | ADCY6       | ADCY6  | 7962842  | 0.327264 | 0.006701 | 0.222644 | cg24092939 | N_Shore 5'UTR                 | ADCY6             | -0.05374  |

**filtered target genes of TP53 in non-obese liver**

| Position         | Score | Gene Name | Name    | probe_ID | logFC    | PValue   | FDR      | Probe ID   | RELATION_T UCSC_REFGENE_GROUP | UCSC_REFGENE_NAME | T2D-non   |
|------------------|-------|-----------|---------|----------|----------|----------|----------|------------|-------------------------------|-------------------|-----------|
| chr11_+_45826640 | 1.584 | SLC35C1   | SLC35C1 | 7939590  | 0.762783 | 0.002823 | 0.176496 | cg17066254 | N_Shore TSS1500;TSS1500       | SLC35C1           | -2.11E-02 |

Table S6 Target genes of the top 3 active and inactive transcription factors in ND-obese liver

filtered target genes of HMX1 in ND-obese liver

| Promoter    | Score | Gene Symbol | Name    | probe_ID | logFC    | PValue  | FDR      | Probe ID  | RELATION_TO_UCSC_CPG | UCSC_REFGENE_GROUP | UCSC_REFGENE | ND-non   |
|-------------|-------|-------------|---------|----------|----------|---------|----------|-----------|----------------------|--------------------|--------------|----------|
| chr9_-1303: | 0.58  | FAM129B     | FAM129B | 8164217  | 0.370197 | 0.00706 | 0.293466 | cg1440991 | N/A                  | Body;Body          | FAM129B      | -0.02526 |
| chr9_-1303: | 0.327 | FAM129B     | FAM129B | 8164217  | 0.370197 | 0.00706 | 0.293466 | cg1440991 | N/A                  | Body;Body          | FAM129B      | -0.02526 |

filtered target genes of MAFB in ND-obese liver

| Promoter    | Score | Gene Symbol | Name    | probe_ID | logFC    | PValue   | FDR      | Probe ID  | RELATION_TO_UCSC_CPG | UCSC_REFGENE_GROUP | UCSC_REFGENE | ND-non   |
|-------------|-------|-------------|---------|----------|----------|----------|----------|-----------|----------------------|--------------------|--------------|----------|
| chr12_-404: | 0.794 | SLC2A13     | SLC2A13 | 7962327  | 0.44039  | 0.000411 | 0.183282 | cg0264194 | N/A                  | Body               | SLC2A13      | -0.10166 |
| chr7_-2883: | 0.544 | GNA12       | GNA12   | 8137865  | 0.469257 | 0.000113 | 0.144561 | cg0893327 | N/A                  | 3'UTR              | GNA12        | -0.04248 |
| chr11_-613: | 1.256 | SYT7        | SYT7    | 7948588  | 0.924832 | 0.002107 | 0.229377 | cg1339585 | N/A                  | Body               | SYT7         | -0.04829 |
| chr13+_980  | 0.711 | RAP2A       | RAP2A   | 7969693  | 0.536908 | 5.93E-05 | 0.130579 | cg1928329 | S_Shelf              | Body               | RAP2A        | -0.09815 |
| chr13+_980  | 0.799 | RAP2A       | RAP2A   | 7969693  | 0.536908 | 5.93E-05 | 0.130579 | cg1928329 | S_Shelf              | Body               | RAP2A        | -0.09815 |
| chr11_-613: | 1.256 | SYT7        | SYT7    | 7948588  | 0.924832 | 0.002107 | 0.229377 | cg2391784 | N/A                  | Body               | SYT7         | -0.06545 |
| chr3_-1952: | 0.49  | PPP1R2      | PPP1R2  | 8092959  | 0.336147 | 0.001158 | 0.210565 | cg2723053 | N_Shelf              | Body               | PPP1R2       | -0.06141 |

filtered target genes of NKX2-3, NKX2-5 in ND-obese liver

| Promoter    | Score | Gene Symbol | Name     | probe_ID | logFC    | PValue   | FDR      | Probe ID  | RELATION_TO_UCSC_CPG | UCSC_REFGENE_GROUP        | UCSC_REFGENE | ND-non   |
|-------------|-------|-------------|----------|----------|----------|----------|----------|-----------|----------------------|---------------------------|--------------|----------|
| chr8_-1757: | 0.762 | MTUS1       | MTUS1    | 8149500  | -0.31468 | 0.00047  | 0.184307 | cg0012138 | N/A                  | Body;TSS200;Body;Body;Bod | MTUS1        | -0.17207 |
| chr3_-7117: | 0.286 | FOXP1       | FOXP1    | 8088776  | -0.29018 | 0.003497 | 0.250433 | cg0097075 | N/A                  | Body                      | FOXP1        | -0.06017 |
| chr3_-7117: | 0.297 | FOXP1       | FOXP1    | 8088776  | -0.29018 | 0.003497 | 0.250433 | cg0097075 | N/A                  | Body                      | FOXP1        | -0.06017 |
| chr3_-7117: | 0.286 | FOXP1       | FOXP1    | 8088776  | -0.29018 | 0.003497 | 0.250433 | cg0736885 | N/A                  | 5'UTR;5'UTR               | FOXP1        | -0.09083 |
| chr3_-7117: | 0.297 | FOXP1       | FOXP1    | 8088776  | -0.29018 | 0.003497 | 0.250433 | cg0736885 | N/A                  | 5'UTR;5'UTR               | FOXP1        | -0.09083 |
| chr10_-105: | 0.297 | SH3PXD2A    | SH3PXD2A | 7936115  | -0.51315 | 0.005999 | 0.280566 | cg1256911 | N/A                  | Body                      | SH3PXD2A     | -0.05335 |
| chr3_-7117: | 0.286 | FOXP1       | FOXP1    | 8088776  | -0.29018 | 0.003497 | 0.250433 | cg1547288 | N/A                  | Body                      | FOXP1        | -0.03368 |
| chr3_-7117: | 0.297 | FOXP1       | FOXP1    | 8088776  | -0.29018 | 0.003497 | 0.250433 | cg1547288 | N/A                  | Body                      | FOXP1        | -0.03368 |
| chr6+_1361  | 0.676 | PDE7B       | PDE7B    | 8122222  | -0.44658 | 0.005818 | 0.27898  | cg1714850 | N/A                  | Body                      | PDE7B        | -0.04140 |
| chr17+_378  | 0.258 | GRB7        | GRB7     | 8006940  | -0.4159  | 0.009987 | 0.317595 | cg1735571 | N/A                  | TSS1500;TSS1500           | GRB7         | 0.07341  |
| chr10_-105: | 0.297 | SH3PXD2A    | SH3PXD2A | 7936115  | -0.51315 | 0.005999 | 0.280566 | cg2024129 | Island               | Body                      | SH3PXD2A     | -0.03453 |
| chr17+_378  | 0.258 | GRB7        | GRB7     | 8006940  | -0.4159  | 0.009987 | 0.317595 | cg2567621 | N/A                  | Body;Body                 | GRB7         | -0.03880 |

filtered target genes of PAX2 in ND-obese liver

| Promoter    | Score | Gene Symbol | Name   | probe_ID | logFC    | PValue   | FDR      | Probe ID  | RELATION_TO_UCSC_CPG | UCSC_REFGENE_GROUP      | UCSC_REFGENE | ND-non   |
|-------------|-------|-------------|--------|----------|----------|----------|----------|-----------|----------------------|-------------------------|--------------|----------|
| chr6_-5321: | 1.121 | ELOVL5      | ELOVL5 | 8127145  | 0.398788 | 0.004198 | 0.255766 | cg1174835 | N/A                  | 5'UTR                   | ELOVL5       | -0.07295 |
| chr6_-5321: | 0.753 | ELOVL5      | ELOVL5 | 8127145  | 0.398788 | 0.004198 | 0.255766 | cg1174835 | N/A                  | 5'UTR                   | ELOVL5       | -0.07295 |
| chr6_-5321: | 0.983 | ELOVL5      | ELOVL5 | 8127145  | 0.398788 | 0.004198 | 0.255766 | cg1174835 | N/A                  | 5'UTR                   | ELOVL5       | -0.07295 |
| chr17_-269: | 0.937 | ALDOC       | ALDOC  | 8013660  | 0.650618 | 0.006585 | 0.289152 | cg1569223 | N/A                  | TSS200                  | ALDOC        | 0.02484  |
| chr17_-269: | 0.938 | ALDOC       | ALDOC  | 8013660  | 0.650618 | 0.006585 | 0.289152 | cg1569223 | N/A                  | TSS200                  | ALDOC        | 0.02484  |
| chr6_-1344: | 1.182 | SGK1        | SGK1   | 8129677  | 0.795798 | 0.004794 | 0.261671 | cg2107832 | N/A                  | 3'UTR;3'UTR;3'UTR;3'UTR | SGK1         | -0.09014 |

filtered target genes of UUUUUGC in ND-obese liver

| Promoter    | Score | Gene Symbol | Name | probe_ID | logFC    | PValue  | FDR      | Probe ID  | RELATION_TO_UCSC_CPG | UCSC_REFGENE_GROUP | UCSC_REFGENE | ND-non   |
|-------------|-------|-------------|------|----------|----------|---------|----------|-----------|----------------------|--------------------|--------------|----------|
| chr7_-1217: | 1.337 | AASS        | AASS | 8142554  | -0.73651 | 0.00119 | 0.211413 | cg1168548 | N/A                  | Body               | AASS         | -0.03429 |
| chr7_-1217: | 1.337 | AASS        | AASS | 8142554  | -0.73651 | 0.00119 | 0.211413 | cg1173878 | N/A                  | Body               | AASS         | -0.05801 |

filtered target genes of ZNF423 in ND-obese liver

No results found

Table S7 Target genes of the top 3 active and inactive transcription factors in T2D-obese liver

filtered target genes of ACAGUAI in T2D-obese liver

| Promoter         | Score | Gene Symbol | Name | probe_ID | logFC    | PValue   | FDR      | Probe ID   | RELATION_TO_UCSC_CPG_ISL | UCSC_REFGENE_GROUP | UCSC_REFGENE_NAME | T2D-non   |
|------------------|-------|-------------|------|----------|----------|----------|----------|------------|--------------------------|--------------------|-------------------|-----------|
| chr4_+_126237566 | 0.53  | FAT4        | FAT4 | 8097288  | -0.38904 | 0.000594 | 0.107867 | cg04171487 | N/A                      | Body               | FAT4              | -2.73E-02 |

filtered target genes of CUUUGGU in T2D-obese liver

| Promoter         | Score | Gene Symbol | Name  | probe_ID | logFC    | PValue   | FDR      | Probe ID   | RELATION_TO_UCSC_CPG_ISL | UCSC_REFGENE_GROUP | UCSC_REFGENE_NAME | T2D-non   |
|------------------|-------|-------------|-------|----------|----------|----------|----------|------------|--------------------------|--------------------|-------------------|-----------|
| chr7_-_121784236 | 0.542 | AASS        | AASS  | 8142554  | -0.90496 | 0.000168 | 0.0762   | cg11738782 | N/A                      | Body               | AASS              | -3.13E-02 |
| chr7_+_114055048 | 0.439 | FOXP2       | FOXP2 | 8135544  | -0.35369 | 0.007702 | 0.232529 | cg17356750 | N/A                      | Body;Body;Body     | FOXP2             | -3.72E-02 |

filtered target genes of AGCUGCC in T2D-obese liver

| Position         | Score | Gene Name | Name  | probe_ID | logFC    | PValue   | FDR      | Probe ID   | RELATION_TO_UCSC_CPG_ISL | UCSC_REFGENE_GROUP | UCSC_REFGENE_NAME | T2D-non  |
|------------------|-------|-----------|-------|----------|----------|----------|----------|------------|--------------------------|--------------------|-------------------|----------|
| chr12_-_49177876 | 0.381 | ADCY6     | ADCY6 | 7962842  | 0.327264 | 0.006701 | 0.222644 | cg00160359 | S_Shore                  | 5'UTR;TSS1500      | ADCY6             | -0.0247  |
| chr12_-_49177876 | 0.381 | ADCY6     | ADCY6 | 7962842  | 0.327264 | 0.006701 | 0.222644 | cg24092939 | N_Shore                  | 5'UTR              | ADCY6             | -0.05374 |

filtered target genes of PATZ1 in T2D-obese liver

| Promoter          | Score | Gene Symbol | Name    | probe_ID | logFC    | PValue   | FDR      | Probe ID   | RELATION_TO_UCSC_CPG_ISL | UCSC_REFGENE_GROUP | UCSC_REFGENE_NAME | T2D-non   |
|-------------------|-------|-------------|---------|----------|----------|----------|----------|------------|--------------------------|--------------------|-------------------|-----------|
| chr12_-_49182718  | 1.228 | ADCY6       | ADCY6   | 7962842  | 0.327264 | 0.006701 | 0.222644 | cg00160359 | S_Shore                  | 5'UTR;TSS1500      | ADCY6             | -0.0247   |
| chr11_+_69455837  | 0.831 | CCND1       | CCND1   | 7942123  | 0.647451 | 0.005353 | 0.212972 | cg00248856 | S_Shelf                  | Body               | CCND1             | -2.92E-02 |
| chr11_+_69455938  | 0.85  | CCND1       | CCND1   | 7942123  | 0.647451 | 0.005353 | 0.212972 | cg00248856 | S_Shelf                  | Body               | CCND1             | -2.92E-02 |
| chr1_+_9352931    | 0.904 | SPSB1       | SPSB1   | 7897449  | 0.566254 | 0.00643  | 0.22202  | cg00890054 | N/A                      | 5'UTR              | SPSB1             | -5.23E-02 |
| chr1_+_9352955    | 0.974 | SPSB1       | SPSB1   | 7897449  | 0.566254 | 0.00643  | 0.22202  | cg00890054 | N/A                      | 5'UTR              | SPSB1             | -5.23E-02 |
| chr17_-_1083008   | 0.901 | ABR         | ABR     | 8010983  | 0.530553 | 0.002177 | 0.16838  | cg05633070 | Island                   | Body;Body;Body     | ABR               | -5.63E-02 |
| chr1_+_9352931    | 0.904 | SPSB1       | SPSB1   | 7897449  | 0.566254 | 0.00643  | 0.22202  | cg06943197 | N_Shore                  | 5'UTR              | SPSB1             | -1.52E-02 |
| chr1_+_9352955    | 0.974 | SPSB1       | SPSB1   | 7897449  | 0.566254 | 0.00643  | 0.22202  | cg06943197 | N_Shore                  | 5'UTR              | SPSB1             | -1.52E-02 |
| chr2_+_45878912   | 1.746 | PRKCE       | PRKCE   | 8041763  | 1.326419 | 0.000369 | 0.095471 | cg08203192 | S_Shore                  | Body               | PRKCE             | -2.86E-02 |
| chr11_+_129685732 | 0.955 | TMEM45B     | TMEM45B | 7945169  | 1.363032 | 0.000986 | 0.129046 | cg08809251 | N/A                      | Body               | TMEM45B           | -3.76E-02 |
| chr5_-_1523908    | 0.913 | LPCAT1      | LPCAT1  | 8110841  | 0.339133 | 0.001373 | 0.14027  | cg11576486 | N/A                      | Body               | LPCAT1            | -3.58E-02 |
| chr17_-_1083008   | 0.901 | ABR         | ABR     | 8010983  | 0.530553 | 0.002177 | 0.16838  | cg14236443 | N/A                      | Body;Body;Body     | ABR               | -5.41E-02 |
| chr1_+_955609     | 1.203 | AGRN        | AGRN    | 7896822  | 0.348024 | 0.002127 | 0.16628  | cg22379708 | N_Shore                  | Body               | AGRN              | -3.14E-02 |
| chr1_+_955468     | 1.067 | AGRN        | AGRN    | 7896822  | 0.348024 | 0.002127 | 0.16628  | cg22379708 | N_Shore                  | Body               | AGRN              | -3.14E-02 |
| chr12_-_49182718  | 1.228 | ADCY6       | ADCY6   | 7962842  | 0.327264 | 0.006701 | 0.222644 | cg24092939 | N_Shore                  | 5'UTR              | ADCY6             | -0.05374  |
| chr1_-_11714738   | 1.377 | FBXO2       | FBXO2   | 7912473  | 0.539928 | 0.002814 | 0.176496 | cg25276694 | Island                   | Body               | FBXO2             | 2.93E-02  |
| chr1_-_11714471   | 1.341 | FBXO2       | FBXO2   | 7912473  | 0.539928 | 0.002814 | 0.176496 | cg25276694 | Island                   | Body               | FBXO2             | 2.93E-02  |
| chr1_-_11714396   | 0.955 | FBXO2       | FBXO2   | 7912473  | 0.539928 | 0.002814 | 0.176496 | cg25276694 | Island                   | Body               | FBXO2             | 2.93E-02  |

filtered target genes of PRRX1 in T2D-obese liver

| Promoter         | Score | Gene Symbol | Name  | probe_ID | logFC    | PValue   | FDR      | Probe ID   | RELATION_TO_UCSC_CPG_ISL | UCSC_REFGENE_GROUP | UCSC_REFGENE_NAME | T2D-non   |
|------------------|-------|-------------|-------|----------|----------|----------|----------|------------|--------------------------|--------------------|-------------------|-----------|
| chr14_+_32798478 | 1.587 | AKAP6       | AKAP6 | 7973850  | -0.35931 | 0.005923 | 0.216536 | cg10359332 | N/A                      | 5'UTR              | AKAP6             | -2.93E-02 |
| chr7_+_114066554 | 3.421 | FOXP2       | FOXP2 | 8135544  | -0.35369 | 0.007702 | 0.232529 | cg17356750 | N/A                      | Body;Body;Body     | FOXP2             | -3.72E-02 |

filtered target genes of TP53 in T2D-obese liver

| Position         | Score | Gene Name | Name    | probe_ID | logFC    | PValue   | FDR      | Probe ID   | RELATION_TO_UCSC_CPG_ISL | UCSC_REFGENE_GROUP | UCSC_REFGENE_NAME | T2D-non   |
|------------------|-------|-----------|---------|----------|----------|----------|----------|------------|--------------------------|--------------------|-------------------|-----------|
| chr11_+_45826640 | 1.584 | SLC35C1   | SLC35C1 | 7939590  | 0.762783 | 0.002823 | 0.176496 | cg17066254 | N_Shore                  | TSS1500;TSS1500    | SLC35C1           | -2.11E-02 |

**Table S8 Hypomethylation of glycolytic and lipogenic genes.**

| gene name    | total # probes | Obese versus Non-Obese |                 | Type 2 diabetic versus Non-Obese |                 |
|--------------|----------------|------------------------|-----------------|----------------------------------|-----------------|
|              |                | hypomethylated         | hypermethylated | hypomethylated                   | hypermethylated |
| <i>GCK</i>   | 25             | 14                     | 2               | 9                                | 0               |
| <i>PFKL</i>  | 31             | 11                     | 2               | 6                                | 1               |
| <i>ACACA</i> | 48             | 20                     | 0               | 10                               | 1               |
| <i>ACLY</i>  | 22             | 2                      | 1               | 1                                | 1               |
| <i>FASN</i>  | 55             | 14                     | 2               | 7                                | 1               |
| <i>PRKCE</i> | 61             | 26                     | 2               | 12                               | 1               |
| <i>ATF6</i>  | 25             | 5                      | 2               | 5                                | 1               |

CpG-methylation measured using an Illumina Infinium 450k Bead Chip. Column entitled *total # probes* describes total number of probes per gene measured by the Bead Chip. Remaining columns describe number of probes per gene hypo- or hypermethylated. Hypomethylation was assumed when  $M\text{-value}_{\text{obese}} - M\text{-value}_{\text{non-obese}} \leq 0.25$ . Hypermethylation was assumed when  $M\text{-value}_{\text{obese}} - M\text{-value}_{\text{non-obese}} \geq 0.25$ . This table is related to Figure 4.

**Table S9 Correlation between ATF-motif methylation and clinical parameters**

|                         |          | Correlations   |                |                |          |                |
|-------------------------|----------|----------------|----------------|----------------|----------|----------------|
| Parameter               |          | FASN_ATF       | PRKCE_ATF      | PFKL_ATF       | ACLY_ATF | ACACA_ATF      |
| <b>Age</b>              | <i>r</i> | -.032          | -.072          | -.042          | .167     | -.112          |
|                         | P-value  | .868           | .722           | .827           | .378     | .587           |
| <b>Height</b>           | <i>r</i> | .199           | -.154          | -.131          | .038     | -.204          |
|                         | P-value  | .259           | .399           | .461           | .829     | .272           |
| <b>Weight</b>           | <i>r</i> | -.215          | -.273          | <b>-.597**</b> | -.032    | <b>-.487**</b> |
|                         | P-value  | .223           | .130           | <b>.000</b>    | .855     | <b>.005</b>    |
| <b>BMI</b>              | <i>r</i> | -.311          | -.259          | <b>-.619**</b> | -.050    | <b>-.459**</b> |
|                         | P-value  | .073           | .152           | <b>.000</b>    | .777     | <b>.009</b>    |
| <b>Waist</b>            | <i>r</i> | -.201          | -.234          | <b>-.641**</b> | -.054    | <b>-.411*</b>  |
|                         | P-value  | .296           | .240           | <b>.000</b>    | .778     | <b>.037</b>    |
| <b>HDL</b>              | <i>r</i> | .034           | .312           | .089           | .199     | .224           |
|                         | P-value  | .873           | .158           | .679           | .339     | .329           |
| <b>LDL</b>              | <i>r</i> | .095           | .241           | .087           | .013     | .103           |
|                         | P-value  | .667           | .280           | .692           | .952     | .656           |
| <b>Cholesterol</b>      | <i>r</i> | .300           | .209           | .069           | -.005    | .081           |
|                         | P-value  | .154           | .351           | .748           | .980     | .727           |
| <b>Triglycerides</b>    | <i>r</i> | <b>-.408*</b>  | <b>-.443*</b>  | -.225          | -.085    | -.340          |
|                         | P-value  | <b>.048</b>    | <b>.039</b>    | .290           | .686     | .132           |
| <b>HbA<sub>1c</sub></b> | <i>r</i> | <b>-.557**</b> | -.306          | -.236          | .062     | -.413          |
|                         | P-value  | <b>.005</b>    | .166           | .268           | .767     | .063           |
| <b>Glucose</b>          | <i>r</i> | <b>-.640**</b> | -.110          | -.239          | .009     | <b>-.516*</b>  |
|                         | P-value  | <b>.000</b>    | .609           | .240           | .966     | <b>.012</b>    |
| <b>Insulin</b>          | <i>r</i> | -.217          | <b>-.554**</b> | <b>-.588**</b> | -.140    | <b>-.648**</b> |
|                         | P-value  | .277           | <b>.004</b>    | <b>.001</b>    | .477     | <b>.001</b>    |
| <b>HOMA-IR</b>          | <i>r</i> | -.377          | <b>-.520*</b>  | <b>-.588**</b> | -.103    | <b>-.713**</b> |
|                         | P-value  | .076           | <b>.016</b>    | <b>.003</b>    | .631     | <b>.000</b>    |

Pearson correlation coefficients (*r*) between ATF-motif methylation and clinical parameters studied. Significant relationships are highlighted in bold font. \*\*P<0.01 (2-tailed). \*P<0.05 (2-tailed). This table is related to Figure 4.





Table S10 Comparison of MBD4 Chip ENCODE data with DNA methylation (Infinium 450k) in liver from T2D-obese and non-diabetic obese men

Comparison of MBD4 Chip ENCODE data with DNA methylation (Infinium 450k) in liver from non-diabetic obese versus non-obese men

| Chromosome | MBD4_ENCF002CKQ_Start | MBD4_ENCF002CKQ_End | MBD4_ENCF002CKQ | ND-non_Start | ND-non_End | ND-non_450K_Name | ND-non_GeneName | ND-non M-value |
|------------|-----------------------|---------------------|-----------------|--------------|------------|------------------|-----------------|----------------|
| chr14      | 102701517             | 102702081           | ENCODE_MBD4_333 | 102702045    | 102702095  | cg02022488       | NLRG1           | -0.757933929   |
| chr8       | 132915493             | 132916057           | ENCODE_MBD4_400 | 132915715    | 132915765  | cg07665487       | RFR3A           | -0.743278571   |
| chr11      | 82611614              | 82612178            | ENCODE_MBD4_445 | 82612022     | 82612072   | cg03602013       | C11orf82        | -0.6579375     |
| chr6       | 44225252              | 44225816            | ENCODE_MBD4_452 | 44225648     | 44225698   | cg11699666       | SLC35B2         | -0.639560714   |
| chr11      | 64007783              | 64008347            | ENCODE_MBD4_588 | 64007813     | 64007863   | cg12423493       | FKBP2           | -0.633054821   |
| chr2       | 21231099              | 21231663            | ENCODE_MBD4_149 | 21231605     | 21231655   | cg05961176       | APOB            | -0.60185       |
| chr6       | 26594815              | 26595379            | ENCODE_MBD4_457 | 26595280     | 26595330   | cg26478107       | N/A             | -0.581525714   |
| chr3       | 128399898             | 128400462           | ENCODE_MBD4_380 | 128400220    | 128400270  | cg02610898       | N/A             | -0.508798214   |
| chr10      | 81965285              | 81965849            | ENCODE_MBD4_279 | 81965490     | 81965540   | cg15186042       | ANXA11          | -0.494023214   |
| chr7       | 138818153             | 138818717           | ENCODE_MBD4_321 | 138818388    | 138818438  | cg04662241       | TTC26           | -0.457928571   |
| chr15      | 38746039              | 38746603            | ENCODE_MBD4_428 | 38746242     | 38746292   | cg05843574       | FAM98B          | -0.413928571   |
| chr6       | 155816112             | 155816676           | ENCODE_MBD4_350 | 155816164    | 155816214  | cg16095551       | N/A             | -0.409040714   |
| chr4       | 84376928              | 84377492            | ENCODE_MBD4_221 | 84377292     | 84377342   | cg22541143       | HELQ            | -0.391464286   |
| chr5       | 33440514              | 33441078            | ENCODE_MBD4_399 | 33440737     | 33440787   | cg06484562       | TARS            | -0.360903571   |
| chr16      | 67260774              | 67261338            | ENCODE_MBD4_447 | 67260827     | 67260877   | cg22834154       | LRRC29          | -0.3544125     |
| chr11      | 119039023             | 119039587           | ENCODE_MBD4_300 | 119039171    | 119039221  | cg05169666       | NLRX1           | -0.351985714   |
| chr7       | 94286670              | 94287234            | ENCODE_MBD4_318 | 94286669     | 94286719   | cg20041873       | SGCE            | -0.341902929   |
| chr9       | 136218911             | 136219475           | ENCODE_MBD4_453 | 136219331    | 136219381  | cg13454524       | SURF1           | -0.336157143   |
| chr6       | 52860000              | 52860564            | ENCODE_MBD4_274 | 52860082     | 52860132   | cg25760338       | GSTA4           | -0.3346875     |
| chr7       | 94286670              | 94287234            | ENCODE_MBD4_318 | 94286679     | 94286843   | cg05509218       | SGCE            | -0.306770563   |
| chr13      | 103497959             | 103498523           | ENCODE_MBD4_191 | 103497991    | 103497991  | cg20374041       | ERCC5           | -0.297808929   |
| chr2       | 192542647             | 192543211           | ENCODE_MBD4_558 | 192542877    | 192542927  | cg19839149       | OBFC2A          | -0.2941875     |
| chr6       | 126307900             | 126308464           | ENCODE_MBD4_470 | 126307897    | 126307947  | cg12199684       | TRMT11          | 0.276058929    |
| chr3       | 142297403             | 142297967           | ENCODE_MBD4_379 | 142297747    | 142297797  | cg00969988       | ATR             | 0.280758929    |
| chr2       | 95830964              | 95831528            | ENCODE_MBD4_571 | 95831296     | 95831346   | cg17995403       | ZNF2            | 0.296353571    |
| chr12      | 32111664              | 32112228            | ENCODE_MBD4_460 | 32112207     | 32112257   | cg17281556       | C12orf35        | 0.298735714    |
| chr14      | 24616079              | 24616643            | ENCODE_MBD4_537 | 24616618     | 24616668   | cg12590010       | PSME2           | 0.3497875      |
| chr5       | 112196496             | 112197060           | ENCODE_MBD4_546 | 112197007    | 112197057  | cg10484990       | SRP19           | 0.357289286    |
| chr17      | 80476681              | 80477245            | ENCODE_MBD4_351 | 80477010     | 80477060   | cg01137065       | FOXK2           | 0.373189286    |
| chr4       | 103940479             | 103941043           | ENCODE_MBD4_478 | 103941039    | 103941089  | cg06618713       | NHEDC1          | 0.397458929    |
| chr6       | 148663144             | 148663708           | ENCODE_MBD4_396 | 148663626    | 148663676  | cg01452444       | SASH1           | 0.421192857    |
| chr12      | 81471064              | 81471628            | ENCODE_MBD4_551 | 81471419     | 81471469   | cg00354572       | ACSS3           | 0.438119643    |
| chr12      | 81471366              | 81471930            | ENCODE_MBD4_528 | 81471419     | 81471469   | cg00354572       | ACSS3           | 0.438119643    |
| chr10      | 5726157               | 5726721             | ENCODE_MBD4_106 | 5726466      | 5726516    | cg20676401       | C10orf18        | 0.45003571     |
| chr10      | 116286163             | 116286727           | ENCODE_MBD4_137 | 116286605    | 116286655  | cg01449818       | ABUM1           | 0.471242857    |
| chr3       | 57541526              | 57542090            | ENCODE_MBD4_315 | 57541798     | 57541848   | cg07317755       | PDE12           | 0.542855357    |

Comparison of MBD4 Chip ENCODE data with DNA methylation (Infinium 450k) in liver from T2-diabetic obese versus non-obese men

| Chromosome | MBD4_ENCF002CKQ_Start | MBD4_ENCF002CKQ_End | MBD4_ENCF002CKQ | T2D-non_Start | T2D-non_End | T2D-non_450K_Name | T2D-non_GeneName | T2D-non M-value |
|------------|-----------------------|---------------------|-----------------|---------------|-------------|-------------------|------------------|-----------------|
| chr7       | 11012820              | 11013384            | ENCODE_MBD4_573 | 11013340      | 11013390    | cg07287563        | PHF14            | -0.670432143    |
| chr5       | 74162556              | 74163120            | ENCODE_MBD4_382 | 74162851      | 74162901    | cg06460691        | FAM169A          | -0.532806143    |
| chr6       | 27447138              | 27447702            | ENCODE_MBD4_238 | 27447492      | 27447542    | cg27226147        | N/A              | -1.126012857    |
| chr6       | 87864882              | 87865446            | ENCODE_MBD4_577 | 87865314      | 87865364    | cg03098356        | ZNF292           | -0.40785        |
| chr6       | 143771597             | 14377721            | ENCODE_MBD4_345 | 143771552     | 143771602   | cg08452146        | ADAT2            | 0.408916071     |
| chr10      | 75935830              | 75936394            | ENCODE_MBD4_412 | 75936028      | 75936078    | cg16088251        | ADK              | -0.7512625      |
| chr10      | 121484607             | 121485171           | ENCODE_MBD4_268 | 121485064     | 121485114   | cg19004007        | INPP5F           | -0.832216071    |
| chr11      | 16759866              | 16760430            | ENCODE_MBD4_319 | 16760230      | 16760280    | cg25556987        | C11orf58         | -0.4267625      |
| chr4       | 103940479             | 103941043           | ENCODE_MBD4_478 | 103941039     | 103941089   | cg06618713        | NHEDC1           | 0.439883929     |
| chr12      | 57482027              | 57482591            | ENCODE_MBD4_144 | 57482528      | 57482578    | cg06200494        | NAB2             | -0.254073214    |
| chr1       | 235814038             | 235814602           | ENCODE_MBD4_238 | 235814009     | 235814059   | cg17816394        | GNMG4            | 0.646419643     |
| chr2       | 15701265              | 15701829            | ENCODE_MBD4_111 | 15701450      | 15701500    | cg04222876        | NBAS             | 0.309708929     |
| chr2       | 20646601              | 20647165            | ENCODE_MBD4_354 | 20646743      | 20646793    | cg19594691        | RHOB             | 0.378032143     |
| chr14      | 24630104              | 24630668            | ENCODE_MBD4_146 | 24630380      | 24630430    | cg11065693        | IRF9             | 0.276928571     |
| chr14      | 24630368              | 24630932            | ENCODE_MBD4_467 | 24630380      | 24630430    | cg11065693        | IRF9             | 0.276928571     |
| chr15      | 38746039              | 38746603            | ENCODE_MBD4_428 | 38746242      | 38746292    | cg05843574        | FAM98B           | -0.649541071    |
| chr17      | 79476223              | 79476787            | ENCODE_MBD4_125 | 79476521      | 79476571    | cg22098511        | N/A              | -0.4889         |
| chr17      | 79476223              | 79476787            | ENCODE_MBD4_125 | 79476186      | 79476236    | cg02500691        | N/A              | -0.535840375    |
| chr17      | 80225376              | 80225940            | ENCODE_MBD4_314 | 80225377      | 80225427    | cg04428071        | CSNK1D           | 0.323494286     |

Comparison of MBD4 Chip ENCODE data with DNA methylation (Infinium 450k) in liver from ND-obese versus T2D-obese men

| Chromosome | MBD4_ENCF002CKQ_Start | MBD4_ENCF002CKQ_End | MBD4_ENCF002CKQ | ND-T2D_Start | ND-T2D_End | ND-T2D_450K_Name | ND-T2D_GeneName | ND-T2D M-value |
|------------|-----------------------|---------------------|-----------------|--------------|------------|------------------|-----------------|----------------|
| chr7       | 138818153             | 138818717           | ENCODE_MBD4_321 | 138818388    | 138818438  | cg04662241       | TTC26           | -0.40085       |
| chr3       | 57541526              | 57542090            | ENCODE_MBD4_315 | 57541798     | 57541848   | cg07317755       | PDE12           | 0.5383         |
| chr11      | 65769412              | 65769976            | ENCODE_MBD4_456 | 65769428     | 65769478   | cg09783858       | E1F1AD          | 0.3677125      |
| chr11      | 75946401              | 75946965            | ENCODE_MBD4_189 | 75946452     | 75946502   | cg08868379       | N/A             | -1.48969125    |
| chr12      | 32111664              | 32112228            | ENCODE_MBD4_460 | 32112207     | 32112257   | cg17281556       | C12orf35        | 0.4857125      |
| chr12      | 57482027              | 57482591            | ENCODE_MBD4_144 | 57482528     | 57482578   | cg06200494       | NAB2            | 0.326125       |
| chr1       | 93810820              | 93811384            | ENCODE_MBD4_527 | 93810826     | 93810876   | cg02421543       | DR1             | -0.521225      |
| chr20      | 3800427               | 3800991             | ENCODE_MBD4_361 | 3800838      | 3800888    | cg10780647       | C20orf29        | 0.250975       |
| chr20      | 3800626               | 3801190             | ENCODE_MBD4_491 | 3800838      | 3800888    | cg10780647       | C20orf29        | 0.250975       |
| chr20      | 35724220              | 35724784            | ENCODE_MBD4_421 | 35724590     | 35724640   | cg16239906       | RBL1            | 0.4400375      |
| chr16      | 29984483              | 29985047            | ENCODE_MBD4_114 | 29984665     | 29984715   | cg10316764       | TAOK2           | -0.473952625   |
| chr17      | 80476681              | 80477245            | ENCODE_MBD4_351 | 80477010     | 80477060   | cg01137065       | FOXK2           | 0.5166375      |

**Table S11 Primer sequences for bisulfite PCR pyrosequencing and Luciferase Assays**

| <b>Gene</b>       | <b>Forward Primer</b>             | <b>Reverse Primer</b>              | <b>Sequencing Primer</b>  |
|-------------------|-----------------------------------|------------------------------------|---------------------------|
| <b>GCK_ATF</b>    | GTTATATGGAGGAGATGTAGAATGT         | [Btm]ACACCAAAACCACCAAAACCTAAATTATA | AATGTGGAGTTGGT            |
| <b>PFKL_ATF</b>   | GGGTTTTAGGGAGTAGTTGTATTT          | [Btm]CCTCCCTTTCTACCCTAACAAT        | TGAGTTTGGAGGAGG           |
| <b>ACLY_ATF</b>   | TTTGTAGTTGGTAGGGTAGATAGA          | [Btm]AACATCAAAACCAAAATTACACAATCACT | TTGGTAGGGTAGATAGATTA      |
| <b>ACACA_ATF</b>  | AAGGTAGTAGTGAATGGAGATTGTATTA      | [Btm]ACCCACCTCCATATATTTTCTCTA      | ATTGTATTGGAGTGGTAT        |
| <b>FASN_ATF</b>   | GGAGTTTTGGAAGGTTGAGA              | [Btm]CCCTTCCTCATATAACCAATTCC       | TTTGGGAAGGTTGAGATTT       |
| <b>PRKCE_ATF</b>  | AGATTGGTATATAGAGTATTATGATGTAGG    | [Btm]ATTATAAAATACACTAAACCCACAACA   | GTATATAGAGTATTATGATGTAGGA |
| <b>PFKL_Luci</b>  | TTAATGCATCAGAGGGTCGAGAGGCAGA      | TTAGGATCCTCGGTCTCCCTGCTGAAGG       |                           |
| <b>ACACA_Luci</b> | TTAATGCATTGGCCTGCGTCACAAATCAA     | TTAGGATCCCGCACTTCTAATTAAGCCAAGTGA  |                           |
| <b>FASN_Luci</b>  | TTAATGCATCAGGACAAGGCCCAAGGTAG     | TTAGGATCCACCACGTCAGCCACTGTG        |                           |
| <b>PRKCE_Luci</b> | TTAATGCATATATTCCCCGGAGAGCAATTATTC | TTAGGATCCCCTAAACCCACAGCAAAATAGCC   |                           |

Primer sequences are in 5' to 3' orientation. Primers for pyrosequencing of the common ATF motif (Primer name\_ATF) were generated using the PyroMark Assay Design Software (Qiagen) and are designed to bind to human bisulfite-treated DNA. Primers to amplify human genomic DNA for the Luciferase-Assay (primer name\_Luci) were generated using Primer3. This table is related to the information provided in Experimental Procedures.
